# Supplementary material
Source: PubMed Central journal article supplement (PMC6044424)
Supplement: NIHMS77112-supplement-Supplementary_information.pdf [file NIHMS77112-supplement-Supplementary_information.pdf]

# **Supplementary Information**

## **Versatile protein recognition by the encoded display of chemical elements on a constant macrocyclic scaffold**

Yizhou Li<sup>1,2\*</sup>, Roberto De Luca<sup>2</sup>, Samuele Cazzamalli<sup>2</sup>, Francesca Pretto<sup>3</sup>, Davor Bajic<sup>2</sup>, Jörg Scheuermann<sup>2\*</sup> & Dario Neri<sup>2\*</sup>

### **Affiliation**

1 Chongqing Key Laboratory of Natural Product Synthesis and Drug Research, School of Pharmaceutical Sciences, Chongqing University, 55 Daxuecheng South Road, Shapingba, Chongqing, 401331, P. R. China.

2 Department of Chemistry and Applied Biosciences, Swiss Federal Institute of Technology (ETH Zürich), Vladimir-Prelog-Weg 4, CH-8093 Zürich, Switzerland

3 Philochem AG, 8112 Otelfingen, Switzerland.

### **\* Corresponding Authors**

Tel: +41-44-6337401; e-mail: [yizhouli@cqu.edu.cn](mailto:yizhouli@cqu.edu.cn); [joerg.scheuermann@pharma.ethz.ch](mailto:joerg.scheuermann@pharma.ethz.ch); [dario.neri@pharma.ethz.ch](mailto:dario.neri@pharma.ethz.ch)

## Table of Contents

|          |                                                                               |            |
|----------|-------------------------------------------------------------------------------|------------|
| <b>1</b> | <b>Abbreviations</b>                                                          | <b>S2</b>  |
| <b>2</b> | <b>Materials and General Methods</b>                                          | <b>S3</b>  |
| <b>3</b> | <b>Library Synthesis, Purification, and Characterization</b>                  | <b>S4</b>  |
| <b>4</b> | <b>Affinity Selections of the Library against Immobilized Target Proteins</b> | <b>S39</b> |
| <b>5</b> | <b>Affinity Measurement of Macrocycles Selected from the Library</b>          | <b>S44</b> |
| <b>6</b> | <b>Immunofluorescence Performance of Selected PSA Binder</b>                  | <b>S81</b> |
| <b>7</b> | <b><i>In vivo</i> Performance of CAIX Binder</b>                              | <b>S82</b> |
| <b>8</b> | <b>Performance of Chemical Probes Developed from Selected CaM Binder</b>      | <b>S85</b> |
| <b>9</b> | <b>References</b>                                                             | <b>S91</b> |

## 1. Abbreviations.

BSA: bovine serum albumin

CBB: coomassie brilliant blue

DAPI: 4',6-Diamidino-2'-phenylindole dihydrochloride

DCM: dichloromethane

DE: diversity element

DIPEA: *N, N'*-diisopropylethylamine

DMF: *N, N'*-dimethylformamide

DMSO: dimethyl sulfoxide

DPBS: Dulbecco's phosphate buffered saline

EDC: 1-ethyl-3- (3-dimethylaminopropyl) carbodiimide

EDC-HCl: 1-ethyl-3- (3-dimethylaminopropyl) carbodiimide hydrochloride

EDTA: ethylenediaminetetraacetic acid

FITC: Fluorescein isothiocyanate isomer I

Fmoc: 9-fluorenylmethyloxycarbonyl

HFIP: 1, 1, 1, 3, 3, 3-hexafluoro-2-propanol

HOAt: 1-hydroxy-7-azabenzotriazole

NHS: *N*-hydroxysuccinimide

PAGE: polyacrylamide gel electrophoresis

PBS: phosphate buffered saline

PyBOP: benzotriazol-1-yl-oxytritypyrrolidinophosphonium hexafluorophosphate

SE: succinimidyl ester

sNHS: *N*-hydroxysulfosuccinimide sodium salt

SPPS: solid phase peptide synthesis

TBTA: tris[(1-benzyl-1*H*-1, 2, 3-triazol-4-yl)methyl]amine

TEAA: triethylammonium acetate

TEA: triethylamine

TCEP-HCl: tris(2-carboxyethyl)phosphine hydrochloride

TFA: trifluoroacetic acid

Tfa: trifluoroacetate

TNBS: trinitrobenzenesulfonic acid

Tris-HCl: tris(hydroxymethyl)aminomethane hydrochloride

## **2. Materials and General Methods.**

Unless otherwise noted, all reagents and solvents were purchased from commercial sources and used as received. Oligonucleotides were purchased from DNA Technology (Denmark) and IBA (Germany). All DNA sequences are written in 5' - to 3' - orientation unless otherwise noted. Carboxylic acids and terminal alkynes were purchased from several commercial suppliers including ABCR, ChemBridge, Sigma-Aldrich, TCI Europe, Alfa Aesar, Matrix Scientific, Enamine Store and Acros Organics. Water was purified with a Millipore Milli-Q system. All gel images were captured by a Bio-Rad Chemidoc image system. Nvoc-off and photo-crossing-linking experiments were conducted by a UVP CL-1000 Ultraviolet crosslinker at 365 nm with an intensity of approximately 100  $\mu\text{J}/\text{cm}^2$ .

### 3. Library Synthesis, Purification, and Characterization.

#### (a) Scaffold structures, synthesis, purification and characterization.

As discussed in the main text, three orthogonal amino protecting groups were incorporated in the cyclodecapeptide scaffold **1** using *N*- $\alpha$ -Fmoc- $\epsilon$ -protected- *L*-Lys-OH. The cyclodecapeptide scaffold **1** was synthesized following a modified procedure reported by Boturn and co-workers<sup>1</sup>. Assembly of all peptides was carried out using the Fmoc strategy manually in a glass reaction vessel fitted with a sintered glass frit. Coupling reactions were performed manually by using 2.0 equiv. of *N*-Fmoc-protected amino acid (relative to the resin loading) activated *in situ* with 2.0 equiv. of PyBOP and 5.0 equiv. of DIPEA in DMF for 60 min. The coupling efficiency in manual synthesis was assessed by TNBS tests. Fmoc-protecting groups were removed by treatment with a piperidine/DMF solution (1:4) for 10 min. The process was repeated three times and the completeness of deprotection verified by UV absorption of the piperidine washings at 299 nm. Synthetic linear peptides were recovered directly upon acid cleavage. Before cleavage, the resin was washed thoroughly with DCM. The peptide was released from the resin using a cleavage solution of TFE/AcOH/DCM (2:1:7, 2  $\times$  30 min).

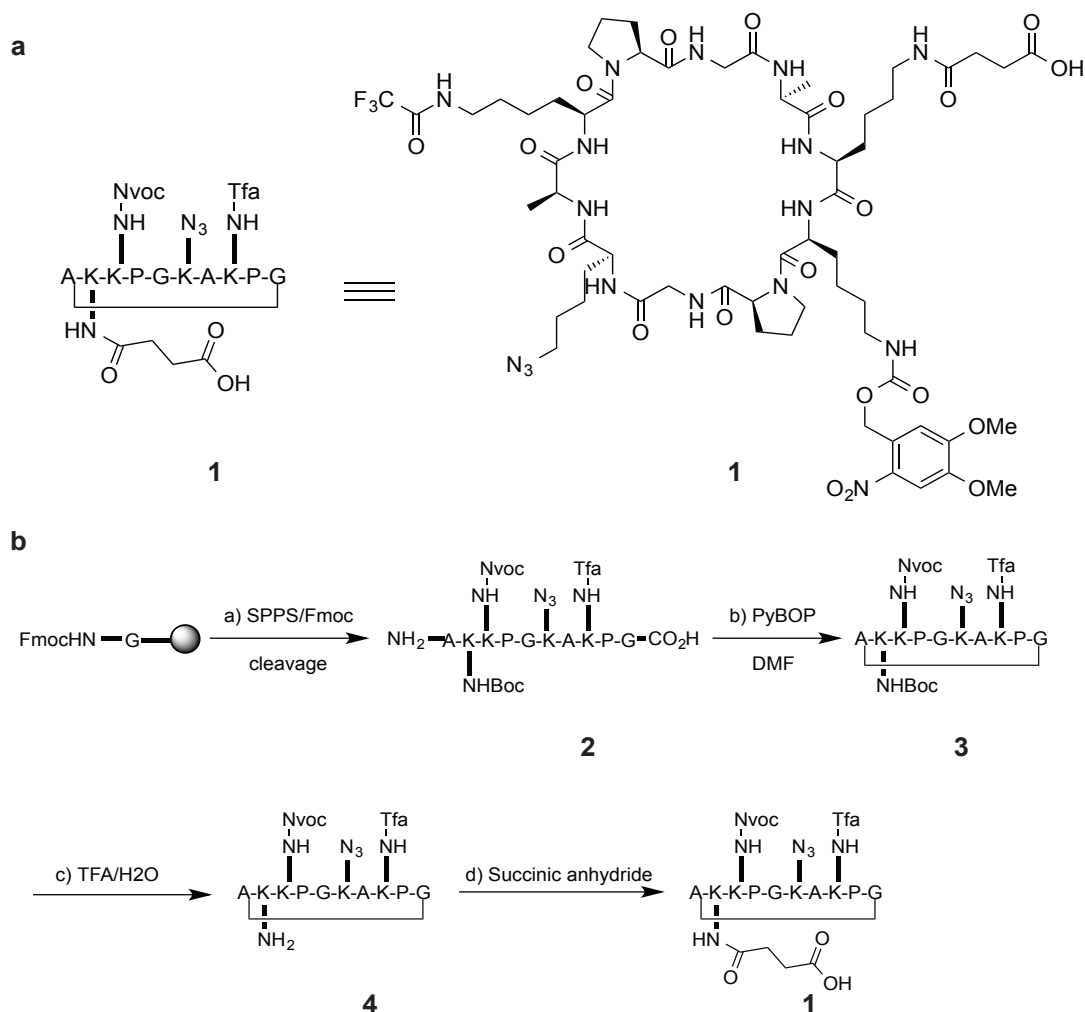

**Supplementary Figure 1 | Structure of scaffold 1 for library construction.** **a**, Structure of the cyclodecapeptide scaffold with three orthogonal amino protecting groups. All amino acid residues in the peptide sequence are in the *L*-form. **b**, Synthesis scheme of scaffold **1**. a) Fmoc-protected amino acid: 2.0 eq., PyOB: 2.0 eq., DIPEA: 5.0 eq., SPPS; b) PyBOP: 1.0 eq. 25 °C, 3 h; c) TFA/H<sub>2</sub>O (20:1), 25 °C, 1 h; d) Succinic anhydride: 1.0 eq., 25 °C, 1 hour.

**Synthesis of the linear decapeptide 2:** the linear decapeptide was assembled on Fmoc-Gly-2-chlorotriylchloride® Tenta gel-resin (0.1 mmol, loading of 0.17 mmol/g, Rapp, Catalog: RA1213) using the general procedure in the following sequence: Fmoc-*L*-Pro-OH (Aldrich, Catalog: 47636), Fmoc-*L*-Lys(Tfa)-OH (Senn, Catalog: 100575), Fmoc-*L*-Ala-OH (Aldrich, Catalog: 531480), Fmoc-*L*-Lys(N<sub>3</sub>)-OH (ChemPep, 101227), Fmoc-Gly-OH (Novabiochem, Catalog: 04-12-1001-25), Fmoc-*L*-Pro-OH, Fmoc-*L*-Lys(Nvoc)-OH (Anaspec, Catalog: AS62574-1000), Fmoc-*L*-Lys(Boc)-OH (Fluka, 47624), Fmoc-*L*-Ala-OH. The peptide was released from the resin using a cleavage solution of TFE/AcOH/DCM (2:1:7). Linear protected peptide was obtained as a white-yellow powder after precipitation and washing with diethyl ether, dissolved by CH<sub>3</sub>CN/H<sub>2</sub>O (1:1) and lyophilized. **HRMS (*m/z*, C<sub>61</sub>H<sub>94</sub>F<sub>3</sub>N<sub>17</sub>O<sub>20</sub>, ESI):** calculated [M+H]<sup>+</sup>: 1442.6891; found: 1442.6886.

**Synthesis of the cyclodecapeptide 3:** the linear decapeptide 2 (5 mM) was dissolved in DMF and the pH was adjusted to 9 by addition of DIPEA. PyBOP (1.0 equiv.) was added and the solution stirred at 25 °C for 3 h. Solvent was removed under reduced pressure and the residue dissolved in CH<sub>3</sub>CN/H<sub>2</sub>O (1:1), followed by reverse-phase HPLC purification. The desired cyclodecapeptide 3 was recovered as a white-yellow powder after lyophilization. **HRMS (*m/z*, C<sub>61</sub>H<sub>92</sub>F<sub>3</sub>N<sub>17</sub>O<sub>19</sub>, ESI):** calculated [M+H]<sup>+</sup>: 1424.6786; found: 1424.6793.

**Synthesis of the cyclodecapeptide 4:** to the cyclodecapeptide 3 was added 1 mL H<sub>2</sub>O and 20 mL TFA and the solution stirred at room temperature for 1 hour. Solvent was removed under reduced pressure and the residue dissolved in CH<sub>3</sub>CN/H<sub>2</sub>O (1:1). The desired cyclodecapeptide 4 was recovered as a white-yellow powder after lyophilization. **HRMS (*m/z*, C<sub>56</sub>H<sub>84</sub>F<sub>3</sub>N<sub>17</sub>O<sub>17</sub>, ESI):** calculated [M+H]<sup>+</sup>: 1324.6261; found: 1324.6267.

**Synthesis of the cyclodecapeptide 1:** the linear decapeptide 4 (0.5 M) were dissolved in DMF and the pH was adjusted to 9 by addition of DIPEA (5.0 equiv.). Succinic anhydride (1.0 equiv.) was added and the solution stirred at 25 °C for 1 h. The solvent was removed under reduced pressure and the residue dissolved in CH<sub>3</sub>CN/H<sub>2</sub>O (1:1), followed by reverse-phase HPLC purification. The desired cyclodecapeptide 1 was recovered as a white-yellow powder after lyophilization. **HRMS (*m/z*, C<sub>60</sub>H<sub>88</sub>F<sub>3</sub>N<sub>17</sub>O<sub>20</sub>, ESI):** calculated [M+H]<sup>+</sup>: 1424.6422; found: 1424.6416.

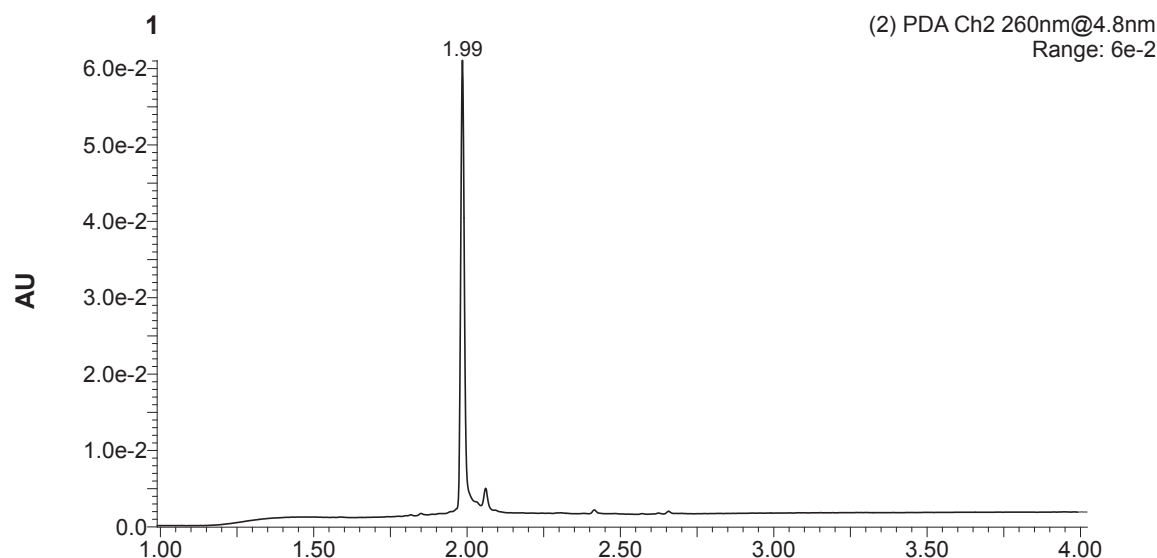

**Supplementary Figure 2 | UPLC chromatogram of SC-1.** UPLC analyses were performed on a BEH C18 2.1 × 50 mm column at a flow rate of 0.6 mL/min with gradient: 5 % B (0 to 0.5 minutes), 5% to 100 % B (0.5 to 4 minutes), 100 % B (4 to 6 minutes), (A= 0.1 % formic acid in water, B= CH<sub>3</sub>CN with 0.1 % formic acid), at 40 °C. Detection by absorbance at 260 nm.

**(b) Testing the reactivity of the orthogonal protection groups.**

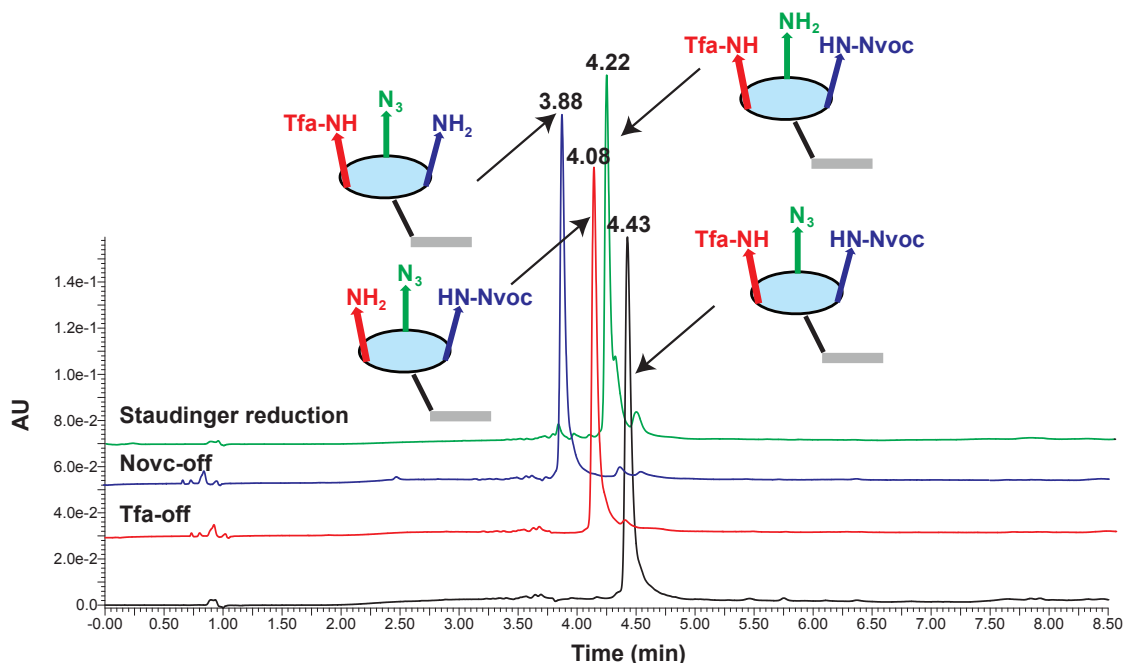

**Supplementary Figure 3 | UPLC chromatogram of scaffold-oligonucleotide conjugate and orthogonal deprotections.** UPLC analyses were performed on a XBridge<sup>®</sup> Oligonucleotide BEH C18 10 × 50 mm column at a flow rate of 0.5 mL/min with gradient: 0 % to 5 % B (0 to 0.5 minutes), 5 % to 50 % B (0.5 to 7 minutes), 50 % to 100 % B (7 to 7.1 minutes), 100 % B (7 to 8 minutes), 100 % to 0% B (8 to 10 minutes) (A= TEA 10 mM, HFIP 5 mM in water, B= MeOH), at 60 °C. Detection by absorbance at 260 nm.

**Conjugation of scaffold to oligonucleotide:** To a solution of amino-modified oligonucleotide (code 1: 5'-amino-C6-GGAGCTTCTGAATTCTGTGTGCTGTTATGGCGAGTCCCATGGCGC -3'-OH, 100 nmol) in MOPS buffer (50 mM, pH 8.0, 0.5 M NaCl, 720  $\mu$ L) was added a mixture of scaffold (cyclodecapeptide **1**) (60 mM, 450  $\mu$ L), EDC (300 mM, 40  $\mu$ L), HOAt (60 mM, 40  $\mu$ L) and DIPEA (300 mM, 40  $\mu$ L) in DMSO, previously activated for 15 minutes at room temperature. The reaction was agitated at room temperature for 16 h. The reaction solution was then treated with a second addition of freshly activated scaffold in DMSO (same activation mixture as above) and it was agitated for further 6 h at room temperature. Conjugation reactions were quenched with Tris-HCl (200  $\mu$ L, 500 mM, pH 8.0) at 30 °C for 1 h.<sup>2</sup> After quenching, the conjugate was precipitated with ethanol before purification by HPLC. The separated and collected conjugate was vacuum-dried overnight, redissolved in H<sub>2</sub>O (500  $\mu$ L), quantified by UV absorption at 260 nm yielding a recovery of 45 %. The scaffold conjugate was characterized by UPLC-MS. Deconvoluted molecular mass: predicted: 15491; found: 15491.

**Tfa deprotection:** To the scaffold-oligonucleotide conjugate (10 nmol) ammonium hydroxide solution (25 % aq, 400  $\mu$ L, Aldrich, Catalog: 30501) was added and the Tfa deprotection was allowed for 2h at 25 °C. The Tfa-off conjugates were



vacuum-dried overnight, redissolved in H<sub>2</sub>O (200 μL), and quantified by UV absorption at 260 nm. The recovery yield was over 95 %. TFA-deprotection was analyzed by UPLC-MS. Deconvoluted molecular mass: predicted: 15395; found: 15395.

**Novc-deprotection:** Scaffold-oligonucleotide conjugate (10 nmol) in H<sub>2</sub>O (500 μL) was subjected to irradiation at 365 nm for 60 min at 0 °C (on ice)<sup>3</sup>. The recovery yield was over 85 %. Novc deprotection was analyzed by UPLC-MS. Deconvoluted molecular mass: predicted: 15252; found: 15252.

**Staudinger reduction:** Scaffold-oligonucleotide conjugate (10 nmol) was dissolved in Tris-HCl (1 mL, 500 mM, pH 8.0), followed by addition of TCEP (20 mg, Aldrich, Catalog: 41996). The Staudinger reduction lasted for 12 h at 25 °C, the reduction product was isolated by ethanol precipitation and the pellet was dissolved in H<sub>2</sub>O (200 μL). The recovery yield was over 90 % and the reduction was analyzed by UPLC-MS. Deconvoluted molecular mass: predicted 15465; found: 15465.

As shown in Supplementary Fig. 3, all three protection groups were orthogonally removed with high conversion (over 80 %), indicating the suitability of the designed scaffold **1** for library construction.

**(c) Conjugation of scaffold to code 1 and deprotection of Tfa, purification and characterization.**

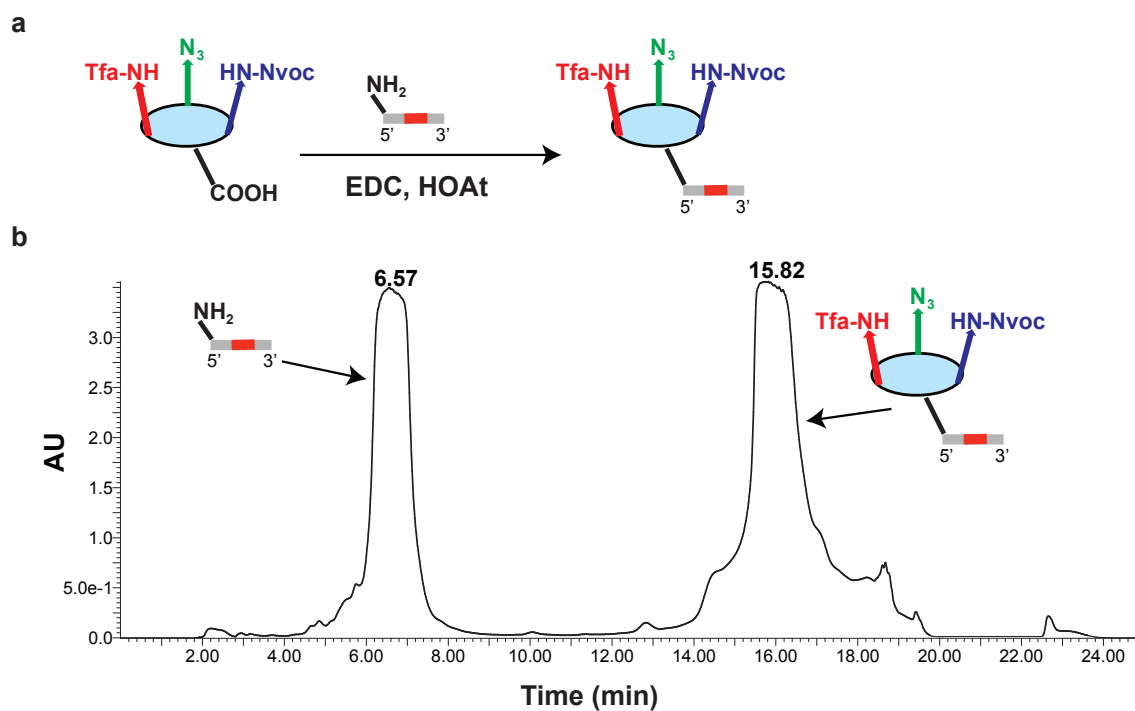

**Supplementary Figure 4 | Conjugation of scaffold to code 1.** **a**, Conjugation of scaffold to code 1 oligonucleotide by EDC and HOAt. **b**, Representative HPLC chromatogram of scaffold-code 1 conjugate. HPLC purifications were performed on a CT18-XTerra 10 × 150 mm column at a flow rate of 4 mL/min with gradient: 10 % B to 40 % B in 15 minutes, (A= TEAA 0.1 M in water, B= CH<sub>3</sub>CN 80 % in water), at 25 °C. Detection by absorbance at 260 nm.

To a solution of amino-modified oligonucleotide (code 1: 5'-amino-C6-GGAGCTTCTGAATTCTGTGTGCTG **NNNNNN**CGAGTCCCATGGCGC-3'-OH, **N** represents variable bases serving as code, 100 nmol) in MOPS buffer (50 mM, pH 8.0, 0.5 M NaCl, 720 μL) was added a mixture of scaffold (cyclodecapeptide **1**) (60 mM, 450 μL), EDC (300 mM, 40 μL), HOAt (60 mM, 40 μL) and DIPEA (300 mM, 40 μL) in DMSO, previously activated for 15 minutes at room temperature. The reaction was agitated at room temperature for 16 h. The reaction solution was then treated with a second addition of freshly activated scaffold in DMSO (same activation mixture as above) and it was agitated for further 6 h at room temperature. Conjugation reactions were quenched with Tris-HCl (200 μL, 500 mM, pH 8.0) at 30 °C for 1 h. After quenching, the conjugates were precipitated with ethanol before purifying by HPLC (See Supplementary Fig. 4). The separated and collected conjugates were vacuum-dried overnight, redissolved in H<sub>2</sub>O (500 μL), and quantified by UV absorption at 260 nm. Obtained yields were around 20 - 50 %. All 283 conjugates were characterized by UPLC-MS (see Supplementary Fig. 5).

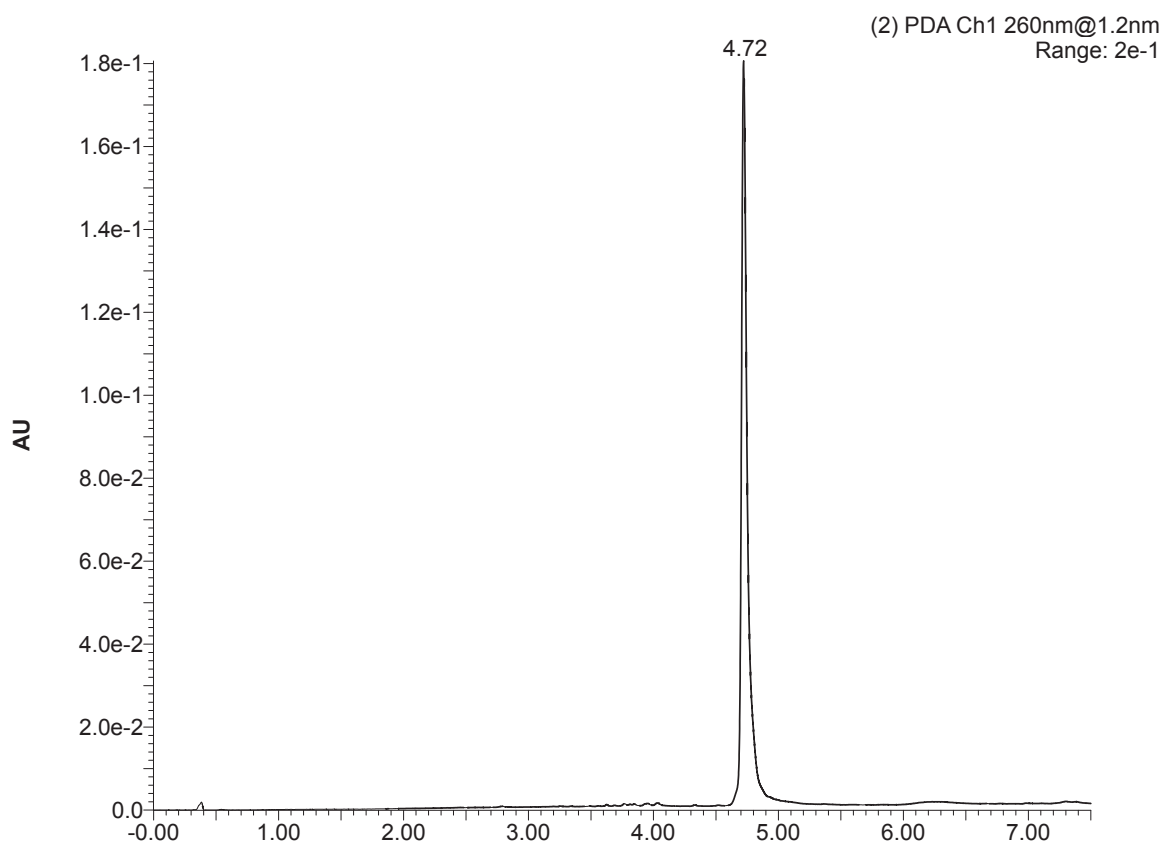

**Supplementary Figure 5 | UPLC chromatogram of scaffold-code 1 conjugate after HPLC purification.** UPLC analyses were performed on a XBridge@ Oligonucleotide BEH C18 10 × 50 mm column at a flow rate of 0.5 mL/min with gradient: 0 % to 5 % B (0 to 0.5 minutes), 5 % to 50 % B (0.5 to 7 minutes), 50 % to 100 % B (7 to 7.1 minutes), 100 % B (7 to 8 minutes), 100 % to 0 % B (8 to 10 minutes) (A= TEA 10 mM, HFIP 5 mM in water, B= MeOH), at 60 °C. Detection by absorbance at 260 nm.

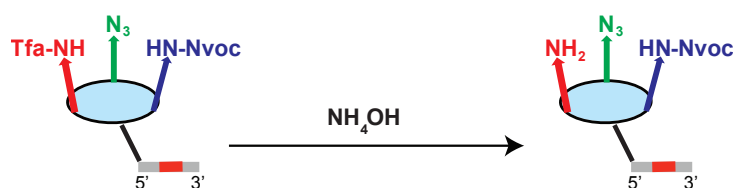

**Supplementary Figure 6 | Deprotection of Tfa by ammonium hydroxide solution.**

To scaffold-code 1 conjugates (10 nmol), ammonium hydroxide solution (25 % aq) was added and the Tfa deprotection reactions performed at 25 °C for 2 h. The Tfa-off conjugates were vacuum-dried overnight, redissolved in H<sub>2</sub>O (200 μL), and quantified by UV absorption at 260 nm. The recovery yields were over 95 %. All 283 conjugates were characterized by UPLC-MS.

(d) Conjugation of 281 carboxylic acids as 1<sup>st</sup> diversity elements (DE-1) and characterization.

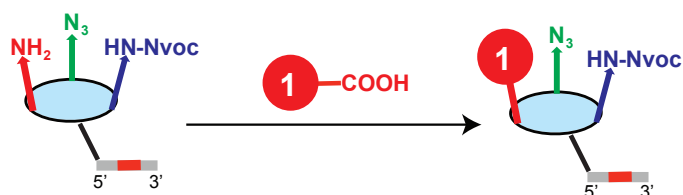

Supplementary Figure 7 | Conjugation of 1<sup>st</sup> diversity elements.

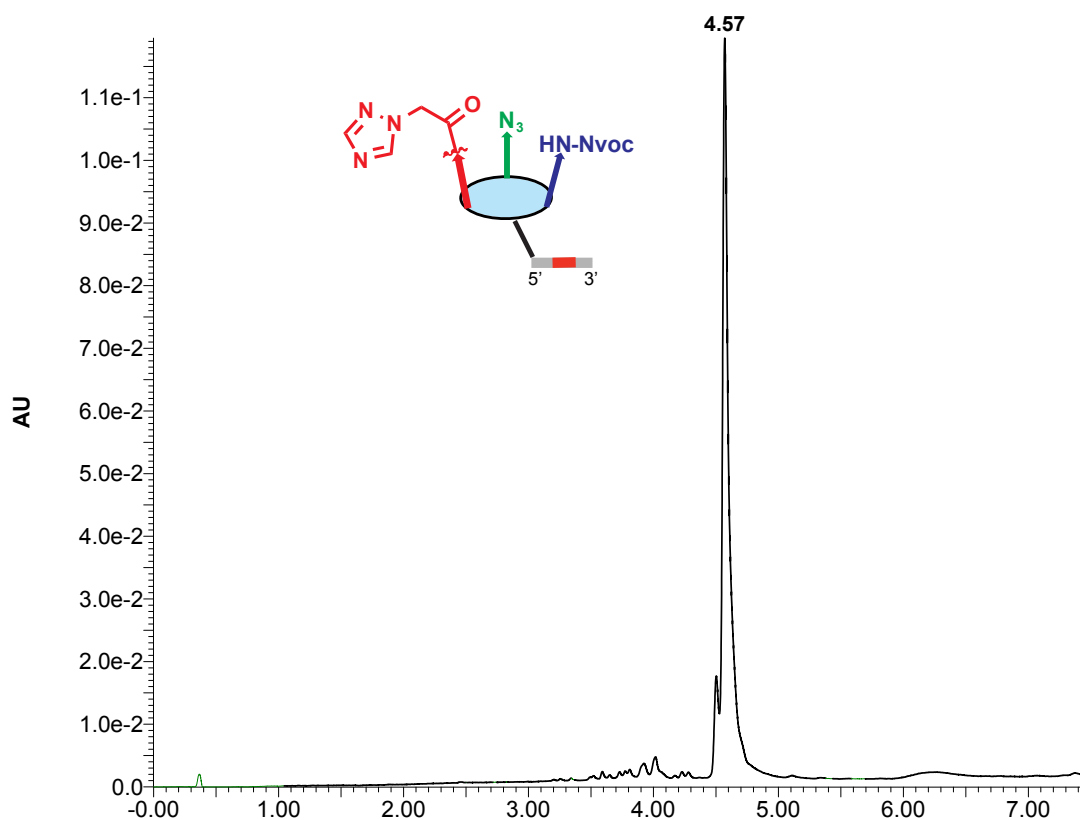

Supplementary Figure 8 | Representative UPLC chromatogram of the 1<sup>st</sup> diversity element conjugate. UPLC analyses were performed on a on a XBridge@ Oligonucleotide BEH C18 10 × 50 mm column at a flow rate of 0.5 mL/min with gradient: 0 % to 5 % B (0 to 0.5 minutes), 5 % to 50 % B (0.5 to 7 minutes), 50 % to 100 % B (7 to 7.1 minutes), 100 % B (7 to 8 minutes), 100 % to 0 % B (8 to 10 minutes) (A= TEA 10 mM, HFIP 5 mM in water, B= MeOH), at 60 °C. Detection by absorbance at 260 nm.

The conjugates (5 nmol) were immobilized on DEAE sepharose (0.1 mL of slurry, GE Healthcare, Catalog: 17-0709-01). The resin was washed with aq AcOH (3 × 0.5 mL, 10 mM), H<sub>2</sub>O (3 × 0.5 mL) and DMSO (3 × 0.5 mL). To the resin-immobilized DNA-conjugate was added a solution of the corresponding carboxylic acid as diversity element (50 mM), EDC-

HCl (50 mM, Aldrich, Catalog: 03449) and HOAt (5 mM, Aldrich Catalog: 41996) in DMSO (0.5 mL). The slurry was agitated at 25 °C for 2 h. The solution was removed, the resin was washed with DMSO (3 × 0.5 mL) and treated with freshly activated reaction solution. These steps were repeated to reach two coupling steps of 2 h each. The reaction solution was removed and the resin washed with DMSO (3 × 0.5 mL) and aq AcOH (3 × 0.5 mL, 10 mM). The DNA was eluted from the resin by incubation with aq AcOH (3 × 0.2 mL, 3 M) for 30 min each time<sup>4</sup>. The DNA-conjugates were isolated by ethanol precipitation, the pellets were redissolved in deionized water (500 µL), quantified by UV absorption at 260 nm. Recovery yields were around 80 - 90 %. 281 carboxylic acids and 283 DNA tags were employed as first diversity elements and corresponding barcodes (One extra tag was used to encode “Tfa-on” a further tag was used to encode “Tfa-off” [NH<sub>2</sub>]). All 283 conjugates were characterized by UPLC-MS and conversion yields were all over 80 %, based on the UPLC peak UV integral at 260 nm (see Supplementary Fig. 8). The analysis results are listed as follows:

| Number | Smiles                                                      | Codon  | Predicted (Da) | Found (Da) |
|--------|-------------------------------------------------------------|--------|----------------|------------|
| 1      | <chem>C\C=C\CCC(O)=O</chem>                                 | CACGTT | 15435          | 15436      |
| 2      | <chem>CC(C)CC(O)=O</chem>                                   | ATCTAT | 15422          | 15422      |
| 3      | <chem>CCC(C)CC(O)=O</chem>                                  | AGAATA | 15495          | 15495      |
| 4      | <chem>CC(C)CCC(O)=O</chem>                                  | GTGAGA | 15527          | 15528      |
| 5      | <chem>OC(=O)CC1CCCC1</chem>                                 | TCATTA | 15449          | 15449      |
| 6      | <chem>OC(=O)CC1CCCCC1</chem>                                | TTGACT | 15479          | 15479      |
| 7      | <chem>CN(C)CC(O)=O</chem>                                   | ACTGTG | 15465          | 15466      |
| 8      | <chem>OCC(O)=O</chem>                                       | GCCGCT | 15399          | 15399      |
| 9      | <chem>CC1=CC(C)=C(CCC(O)=O)C=C1</chem>                      | ATAGCT | 15524          | 15524      |
| 10     | <chem>OC(=O)CNC(=O)C1=CC=CC=C1</chem>                       | CACGCA | 15495          | 15495      |
| 11     | <chem>OC(=O)C[C@@H]1C[C@H]2CC[C@@H]1C2</chem>               | TACCGG | 15501          | 15501      |
| 12     | <chem>CC1=CC=CC=C1CC(O)=O</chem>                            | TGGTTC | 15503          | 15503      |
| 13     | <chem>CC1=CC=C(CC(O)=O)C=C1</chem>                          | ACCACG | 15466          | 15465      |
| 14     | <chem>CC1=CC(CC(O)=O)=CC=C1</chem>                          | TGGTCA | 15512          | 15512      |
| 15     | <chem>OC(=O)CCS(=O)(=O)C1=CC=CC=C1</chem>                   | TGCAAC | 15545          | 15545      |
| 16     | <chem>CC1(C)[C@@H]2CC[C@@H]1(C)[C@H](CC(O)=O)[C@H]2O</chem> | AAGTAC | 15567          | 15567      |
| 17     | <chem>CN(CC(O)=O)C(=O)C1=CC=CC=C1</chem>                    | AGCCGC | 15525          | 15525      |
| 18     | <chem>CC1=CC=C(SCC(O)=O)C=C1</chem>                         | ATCAAG | 15537          | 15537      |
| 19     | <chem>O[C@H](CC(O)=O)C1=CC=CC=C1</chem>                     | TCCTAG | 15488          | 15488      |
| 20     | <chem>COC1=CC(CCC(O)=O)=C(OC)C=C1</chem>                    | ACTATT | 15531          | 15530      |
| 21     | <chem>CC(O)(CC(O)=O)C(F)(F)F</chem>                         | CCTAAT | 15478          | 15478      |
| 22     | <chem>OCC1=CC=C(CC(O)=O)C=C1</chem>                         | AGTAAT | 15536          | 15536      |
| 23     | <chem>OC(=O)CC1=CC=C2OCOC2=C1</chem>                        | CTAAGT | 15526          | 15526      |
| 24     | <chem>COC1=CC(CC(O)=O)=CC=C1O</chem>                        | GAAGAT | 15577          | 15577      |
| 25     | <chem>COC1=CC(OC)=NC(CCC(O)=O)=N1</chem>                    | ACTGAC | 15543          | 15543      |
| 26     | <chem>OC(=O)CCC1=CC=CN=C1</chem>                            | GAATGC | 15522          | 15522      |
| 27     | <chem>OC(=O)CCCC1=CC=C(I)C=C1</chem>                        | AATTGG | 15676          | 15676      |
| 28     | <chem>COC1=CC2=C(NC(CC(O)=O)=C2)C=C1</chem>                 | ATTAGA | 15575          | 15576      |
| 29     | <chem>OC(=O)C[C@]12CC3CC(C[C@@](O)(C3)C1)C2</chem>          | CGTGCG | 15573          | 15573      |
| 30     | <chem>OC(=O)CC1=CC(F)=C(F)C(F)=C1</chem>                    | TGGCGT | 15568          | 15569      |
| 31     | <chem>OC(=O)CCNC(=O)C1=CC=C(C=C1)[N+](=[O-])=O</chem>       | TTCTGA | 15575          | 15576      |
| 32     | <chem>CCOC1=CC(CC(O)=O)=CC=C1O</chem>                       | TCACTT | 15493          | 15493      |
| 33     | <chem>COC1=CC2=C(C=C1)C(=O)C(CC(O)=O)C2</chem>              | GTCACT | 15542          | 15543      |

|    |                                                     |        |       |       |
|----|-----------------------------------------------------|--------|-------|-------|
| 34 | <chem>OC(=O)CCC1CNC2=C1C=CC=C2</chem>               | TTCACA | 15497 | 15498 |
| 35 | <chem>OC(=O)CC1=CC2=C(S1)C=CC(Cl)=C2</chem>         | GTCTAA | 15572 | 15573 |
| 36 | <chem>COC1=CC=C(Br)C=C1CC(O)=O</chem>               | AATCTC | 15551 | 15510 |
| 37 | <chem>OC(=O)CC1NC(=O)NC1=O</chem>                   | AATGGT | 15544 | 15544 |
| 38 | <chem>OC(=O)CCN1C(=O)OC2=C1C=CC=C2</chem>           | TCTTAA | 15528 | 15528 |
| 39 | <chem>OC(=O)CC1=C(F)C(F)=C(F)C(F)=C1F</chem>        | CTACAA | 15541 | 15542 |
| 40 | <chem>OC(=O)CC1=CC=C(OC2=CC=CC=C2)C=C1</chem>       | CTTGGA | 15590 | 15590 |
| 41 | <chem>OC(=O)CCC1=CC=C(N1)C1=CC=CC=C1</chem>         | CTCAGG | 15562 | 15562 |
| 42 | <chem>CC1=CN(CC(O)=O)C(=O)NC1=O</chem>              | CCATAA | 15499 | 15499 |
| 43 | <chem>OC(=O)CC1=CC=C(Cl)N=C1</chem>                 | GACGTG | 15559 | 15559 |
| 44 | <chem>NS(=O)(=O)C1=CC=C(NC(=O)CCC(O)=O)C=C1</chem>  | GAGACA | 15652 | 15652 |
| 45 | <chem>OC(=O)CC1C2=C(C=CC=C2)C2=C1C=CC=C2</chem>     | GTGATT | 15601 | 15601 |
| 46 | <chem>OC(=O)CC1=CC=CC=C1OC1=CC=CC=C1</chem>         | CGGCAC | 15560 | 15560 |
| 47 | <chem>NS(=O)(=O)C1=CC=C(NC(=O)CSCC(O)=O)C=C1</chem> | TGCGCG | 15667 | 15668 |
| 48 | <chem>CN(CC(O)=O)S(=O)(=O)C1=CC=CC=C1</chem>        | GTACAT | 15575 | 15576 |
| 49 | <chem>NC(=O)NCCC(O)=O</chem>                        | GCACGA | 15488 | 15488 |
| 50 | <chem>OC(=O)CC1OC2=C(NC1=O)C=CC=C2</chem>           | CTCGAT | 15529 | 15529 |
| 51 | <chem>OC(=O)CC1=CC2=C(N1)C=CC=C2</chem>             | TAGCAC | 15506 | 15506 |
| 52 | <chem>CC1=C(CC(O)=O)NC2=C1C=CC=C2</chem>            | ACACGG | 15545 | 15545 |
| 53 | <chem>COC1=C(CO)C=CC(OCC(O)=O)=C1</chem>            | AGTTCT | 15549 | 15549 |
| 54 | <chem>CC1=C(CCC(O)=O)C=CC=C1</chem>                 | CTGGTG | 15542 | 15542 |
| 55 | <chem>OC(=O)CCC1=CC(=O)C2=C(O1)C=CC(F)=C2</chem>    | GCGCAC | 15568 | 15568 |
| 56 | <chem>OC(=O)CCC1=NN=C(O1)C1=CC=CC=C1</chem>         | CTCCGC | 15501 | 15501 |
| 57 | <chem>OC(=O)CCC1=NOC(=C1)C1=CC=C(Cl)C=C1</chem>     | TGAGCA | 15622 | 15623 |
| 58 | <chem>OC(=O)CC1=CC=C2C=CC=CC2=C1</chem>             | TGCCAG | 15533 | 15533 |
| 59 | <chem>OC(=O)CC1=CSC=C1</chem>                       | GAGAAG | 15562 | 15562 |
| 60 | <chem>OC(=O)CCC(=O)C1=CC=CS1</chem>                 | GTAGCA | 15555 | 15555 |
| 61 | <chem>COC1=CC(CC(O)=O)=CC=C1F</chem>                | CATCTA | 15490 | 15490 |
| 62 | <chem>OCC1=CC=C(OCCC(O)=O)C=C1</chem>               | TCGATT | 15533 | 15533 |
| 63 | <chem>OC(=O)CCN1C(=O)COC2=C1C=C(Cl)C=C2</chem>      | GTTAGC | 15617 | 15618 |
| 64 | <chem>OC(=O)CCC#C</chem>                            | TATATC | 15419 | 15419 |
| 65 | <chem>OC(=O)CCN1C=NC2=C(C=CC=C2)C1=O</chem>         | GAAGTC | 15589 | 15590 |
| 66 | <chem>CC1=NC2=C(C=CC=C2)N1CCC(O)=O</chem>           | ATGTTA | 15565 | 15565 |
| 67 | <chem>OC(=O)CCC1=NC(=NO1)C1=CN=CC=C1</chem>         | GCTCGC | 15542 | 15542 |
| 68 | <chem>OC(=O)CCN1C=CC(=O)NC1=O</chem>                | TCTCTC | 15457 | 15457 |
| 69 | <chem>CC1=CC2=C(C=C1)C(CC(O)=O)C(=O)N2</chem>       | TTAATA | 15550 | 15550 |
| 70 | <chem>COC1=C(C=CC=C1)C1=NOC(CCC(O)=O)=N1</chem>     | TTGCTT | 15576 | 15576 |
| 71 | <chem>OC(=O)CCC1=NC(=NO1)C1=CC=CO1</chem>           | TGAGGC | 15595 | 15595 |
| 72 | <chem>CC1=NC2=CC(F)=CC=C2C(=C1)C(O)=O</chem>        | CCTCGT | 15503 | 15504 |
| 73 | <chem>CC1=NC2=CC=C(C=C2C=C1)C(O)=O</chem>           | AACATT | 15517 | 15517 |
| 74 | <chem>OC(=O)C1CC2CCC1C2</chem>                      | AGGTGA | 15551 | 15552 |
| 75 | <chem>OC(=O)C1=C2C=CN=CC2=CC=C1</chem>              | TCCAGC | 15480 | 15481 |
| 76 | <chem>OC(=O)C1=NC=CC2=CC=CC=C12</chem>              | TCAGAT | 15519 | 15519 |
| 77 | <chem>OC(=O)C1=CNC(=O)NC1=O</chem>                  | CCAGCT | 15463 | 15463 |
| 78 | <chem>OC(=O)C1=CC=C2NC=CC2=C1</chem>                | CACGAG | 15517 | 15518 |
| 79 | <chem>OC(=O)CC1=CNC2=CC=C(Br)C=C12</chem>           | TATGGA | 15640 | 15640 |
| 80 | <chem>CN1N=C(C(O)=O)C2=CC=CC=C12</chem>             | GCCTCA | 15483 | 15483 |
| 81 | <chem>OC(=O)C1=CC=C2NC=NC2=C1</chem>                | TAGAGG | 15573 | 15573 |
| 82 | <chem>OC(=O)C1=NC2=C(C=CC=C2)N=C1</chem>            | GTGTCT | 15527 | 15528 |
| 83 | <chem>OC(=O)C1=CC2=C(C=C1)N=CC=N2</chem>            | CACCAA | 15474 | 15474 |
| 84 | <chem>CC1=NC(C)=C(CC(O)=O)C(O)=N1</chem>            | TCACAG | 15513 | 15513 |
| 85 | <chem>OC(=O)CCNC(=O)NC12CC3CC(CC(C3)C1)C2</chem>    | TTGAAC | 15612 | 15612 |
| 86 | <chem>OC(=O)C1=NNC(=C1)C1CC1</chem>                 | TAATGT | 15513 | 15513 |
| 87 | <chem>OC(=O)C1=CN2C=CSC2=N1</chem>                  | GCTATG | 15530 | 15530 |
| 88 | <chem>CSC1=NC=C(N1CC1=CC=CC=C1)C(O)=O</chem>        | TACGTA | 15509 | 15509 |
| 89 | <chem>OC(=O)C1=CC=C(C=C1)N1C=CN=C1</chem>           | CCTCAC | 15455 | 15455 |
| 90 | <chem>CC1=NC2=CC=C(C=C2N=C1)C(O)=O</chem>           | CGCCTT | 15500 | 15500 |

|     |                                                              |        |       |       |
|-----|--------------------------------------------------------------|--------|-------|-------|
| 91  | <chem>OC(=O)CC1CCN(CC2=CC=CC=C2)CC1</chem>                   | GATAGT | 15619 | 15620 |
| 92  | <chem>OC(=O)C1=CC=C(C=C1)C1=NN=NN1</chem>                    | AGCGTC | 15537 | 15537 |
| 93  | <chem>OC(=O)C1=CC=C(CN2C=NN=N2)C=C1</chem>                   | GTCATA | 15550 | 15550 |
| 94  | <chem>CCN1N=C(C=C1C(O)=O)C(O)C</chem>                        | TGTTGT | 15550 | 15551 |
| 95  | <chem>CC(C)C1=CC(=NO1)C(O)=O</chem>                          | GTGTTG | 15548 | 15549 |
| 96  | <chem>OC(=O)C1=CC=C(CN2C=CC=N2)O1</chem>                     | TCTTGC | 15505 | 15506 |
| 97  | <chem>CC1(C)NC(=O)N(CC(O)=O)C1=O</chem>                      | CTATAT | 15507 | 15507 |
| 98  | <chem>OC(=O)CCCN1CC2=CC=CC=C2C1</chem>                       | TGCAGA | 15576 | 15577 |
| 99  | <chem>OC(=O)C1CCN(CC2=CC=CO2)CC1</chem>                      | ATGAGG | 15620 | 15620 |
| 100 | <chem>OC(=O)CCN1CCCCC1=O</chem>                              | GTAACG | 15556 | 15556 |
| 101 | <chem>NC(=O)CN1CCCC(C1)C(O)=O</chem>                         | TAAGCT | 15532 | 15532 |
| 102 | <chem>OC(=O)C12CC3CC(CC(C3)(C1)NIC=NC=N1)C2</chem>           | TACAAT | 15577 | 15577 |
| 103 | <chem>OC(=O)C1C2CC(C=C2)C1C(=O)NC1CC1</chem>                 | TCGAGA | 15592 | 15592 |
| 104 | <chem>OC(=O)C1=CN=C(N=C1)C1=CC=CN=C1</chem>                  | CCACTG | 15508 | 15509 |
| 105 | <chem>CC1=CC=C(C=C1N1CCNC1=O)C(O)=O</chem>                   | ATTCGC | 15542 | 15543 |
| 106 | <chem>OC(=O)[C@@H]1C[C@H]1C1=CC=CC=C1</chem>                 | CGTATA | 15508 | 15508 |
| 107 | <chem>CC1(C)C2CCC1(C(O)=O)C(=O)C2</chem>                     | GACAAC | 15522 | 15522 |
| 108 | <chem>CCCN(CCC)[C@@H](C)C(O)=O</chem>                        | TTGCCG | 15511 | 15512 |
| 109 | <chem>CN1[C@@H]([C@H](CC1=O)C(O)=O)C1=CN=CC=C1</chem>        | TCGGCG | 15583 | 15584 |
| 110 | <chem>OC(=O)[C@@H]1CCC(=O)N1</chem>                          | GCGTTA | 15491 | 15491 |
| 111 | <chem>O[C@@H]1CC(=C[C@H](O)[C@H]1O)C(O)=O</chem>             | TGAACG | 15545 | 15545 |
| 112 | <chem>OCC(C(O)=O)C1=CC=CC=C1</chem>                          | TTACTC | 15463 | 15463 |
| 113 | <chem>OC(=O)[C@@H]1CSC(=O)N1</chem>                          | CTAGTA | 15493 | 15493 |
| 114 | <chem>CC(=O)N1C[C@H](O)C[C@H]1C(O)=O</chem>                  | CGATGT | 15535 | 15535 |
| 115 | <chem>CS(=O)(=O)C1=C2NC(=CC2=CC(F)=C1)C(O)=O</chem>          | CCTTGG | 15595 | 15595 |
| 116 | <chem>CC(C)(O)C#CC1=CC=C(O1)C(O)=O</chem>                    | CCGATA | 15525 | 15525 |
| 117 | <chem>OC(=O)C1CN(CC2=CN=CC=C2)C(=O)C1</chem>                 | CTATCG | 15542 | 15542 |
| 118 | <chem>CC(C)CN1CC(CCC1=O)C(O)=O</chem>                        | TCTGCT | 15512 | 15513 |
| 119 | <chem>CC(=O)C1=C(C)N(CC(O)=O)N=C1C</chem>                    | CCTGAG | 15543 | 15544 |
| 120 | <chem>OC(=O)C1=CC=CC=C1N1CCC(=O)NC1=O</chem>                 | CCACCA | 15510 | 15510 |
| 121 | <chem>OC(=O)C1=NOC(=C1)C1=CC=CC=C1</chem>                    | TTCGTT | 15518 | 15517 |
| 122 | <chem>CC(N(C1=CC=CC=C1)S(C)(=O)=O)C(O)=O</chem>              | GATCAC | 15574 | 15574 |
| 123 | <chem>COC1=CC=C(C=C1)C1=CC(=NN1)C(O)=O</chem>                | AGTGAA | 15613 | 15613 |
| 124 | <chem>OC(=O)C1CCN(CC1)C(=O)C1=CC=C(C=C1)[N+](=[O-])=O</chem> | ACGATC | 15609 | 15609 |
| 125 | <chem>OC(=O)CCCC1=NC(=NO1)C1=CC=NC=C1</chem>                 | TTCCAA | 15539 | 15540 |
| 126 | <chem>CC1=C(NC(=O)C2CCCO2)C=C(C=C1)C(O)=O</chem>             | AAGAGC | 15629 | 15629 |
| 127 | <chem>CN(C)C(=O)N1CCC(CC1)C(O)=O</chem>                      | TCAACT | 15506 | 15506 |
| 128 | <chem>OC(=O)C1=CC=CO1</chem>                                 | AGATAC | 15467 | 15467 |
| 129 | <chem>CC1=CC=C(S1)C(O)=O</chem>                              | CACTCG | 15449 | 15449 |
| 130 | <chem>CC1=C(SC(=N1)C1=CC=NC=C1)C(O)=O</chem>                 | TCCGGT | 15558 | 15558 |
| 131 | <chem>CC1=C(C=NN1C1=CC=CC=C1)C(O)=O</chem>                   | TGTCTT | 15530 | 15531 |
| 132 | <chem>CCOC1=C(C=CC=N1)C(O)=O</chem>                          | AGAGCG | 15563 | 15563 |
| 133 | <chem>OC(=O)C1=CN=C(O)C=C1</chem>                            | TGTCGA | 15501 | 15501 |
| 134 | <chem>CC1=NC=C(C=C1)C(O)=O</chem>                            | CGAGAG | 15533 | 15534 |
| 135 | <chem>OC(=O)C1=CC=C(Br)C=N1</chem>                           | CAGTCA | 15533 | 15533 |
| 136 | <chem>OC(=O)C1=CC=C(OC2=CC=C3OCOC3=C2)N=C1</chem>            | GCGGAT | 15646 | 15646 |
| 137 | <chem>OC(=O)C1=C2C=CC=CC2=CC=C1</chem>                       | ATAACA | 15511 | 15512 |
| 138 | <chem>OC(=O)C1=CC=CC(OC2=CC=CC=C2)=C1</chem>                 | AGTCA  | 15544 | 15544 |
| 139 | <chem>OC(=O)C1=CC=C2OC(F)(F)OC2=C1</chem>                    | TGGCGT | 15580 | 15580 |
| 140 | <chem>CC(=O)NC1=CC=C(C=C1NC(C)=O)C(O)=O</chem>               | CACATA | 15551 | 15552 |
| 141 | <chem>COC1=C(OC)C(=CC=C1)C(O)=O</chem>                       | CAGCAG | 15577 | 15578 |
| 142 | <chem>COC1=CC=C(C=C1OC)C(O)=O</chem>                         | CTACAA | 15497 | 15497 |
| 143 | <chem>OC(=O)C1=CC(F)=C(F)C=C1F</chem>                        | GTCCTG | 15514 | 15514 |
| 144 | <chem>OC(=O)C1=CC=C(C=C1)C(F)(F)F</chem>                     | CGCTTA | 15512 | 15512 |
| 145 | <chem>OC(=O)C1=C(F)C=C(Cl)C=C1</chem>                        | GATATA | 15544 | 15544 |
| 146 | <chem>OC(=O)C1=C(F)C(F)=CC=C1</chem>                         | ATTATG | 15519 | 15520 |

|     |                                                       |        |       |       |
|-----|-------------------------------------------------------|--------|-------|-------|
| 147 | <chem>OC(=O)C1=CC(=C(F)C=C1)C(F)(F)F</chem>           | CGATTG | 15570 | 15570 |
| 148 | <chem>OC(=O)C1=CC(F)=C(C=C1)C(F)(F)F</chem>           | GATTCT | 15545 | 15545 |
| 149 | <chem>OC(=O)C1=CC=C(Cl)C=C1</chem>                    | GAGTGT | 15558 | 15558 |
| 150 | <chem>OC(=O)C1=CC=CC(Cl)=C1</chem>                    | ACCGCA | 15472 | 15472 |
| 151 | <chem>OC(=O)C1=C(Cl)C=CC=C1</chem>                    | GATACG | 15527 | 15527 |
| 152 | <chem>CC1=CC(=CC(C)=C1)C(O)=O</chem>                  | AGTCGT | 15512 | 15512 |
| 153 | <chem>OC(=O)C1=CC=C2C=CC=CC2=C1</chem>                | ACGGAA | 15552 | 15552 |
| 154 | <chem>OC(=O)C1=NNC(=O)C=C1</chem>                     | TTCATC | 15437 | 15437 |
| 155 | <chem>CC1=NC2=CC=CC=C2N1CC(O)=O</chem>                | GCATGT | 15552 | 15553 |
| 156 | <chem>OC(=O)C1=CN=CN=C1</chem>                        | TCCATA | 15430 | 15430 |
| 157 | <chem>OC(=O)C1=CSC(=N1)C1=CC=NC=C1</chem>             | CGGTGG | 15609 | 15609 |
| 158 | <chem>CN(CCC(O)=O)C1CCN(C)C1</chem>                   | GCCAGT | 15533 | 15534 |
| 159 | <chem>OC(=O)C1=CC=CS1</chem>                          | CCAAGG | 15484 | 15484 |
| 160 | <chem>OC(=O)C1=CC=NN1</chem>                          | GAGCGG | 15524 | 15524 |
| 161 | <chem>OC(=O)C1=CC=NN=C1</chem>                        | CATGTG | 15474 | 15474 |
| 162 | <chem>OC(=O)C1=C(N=CC=N1)C(=O)N1CCCCC1</chem>         | CAGGAA | 15506 | 15506 |
| 163 | <chem>CC(=O)NC1=CC(=CC(NC(C)=O)=C1)C(O)=O</chem>      | TAGATA | 15606 | 15606 |
| 164 | <chem>OC(=O)CN1N=C2C=CC=CC2=N1</chem>                 | GCCTGG | 15540 | 15540 |
| 165 | <chem>CCN1CC2=C(C1=O)C(=CC=C2)C(O)=O</chem>           | GCAGTG | 15592 | 15592 |
| 166 | <chem>CN1C(=O)NC(=O)C2=C(C=C(C)N=C12)C(O)=O</chem>    | CATAGA | 15590 | 15590 |
| 167 | <chem>CCOCCOC1=CC=C(C=C1)C(O)=O</chem>                | TCGCAT | 15532 | 15532 |
| 168 | <chem>CCN1CCCC(C)(C1)C(O)=O</chem>                    | CTACTT | 15468 | 15468 |
| 169 | <chem>NC(=O)C1(CC1)C(O)=O</chem>                      | ATCGCG | 15476 | 15476 |
| 170 | <chem>CN(CC(O)=O)C1=NC=NC2=C1NC=N2</chem>             | TACCTC | 15489 | 15489 |
| 171 | <chem>OC(=O)C1=CC=C2N=CNC(=O)C2=C1</chem>             | TAGTGA | 15576 | 15576 |
| 172 | <chem>CS(=O)(=O)C1=CC=CC(=C1)C(O)=O</chem>            | TGTATG | 15577 | 15578 |
| 173 | <chem>OC(=O)C1=CC(=CC=C1)C#C</chem>                   | TACTAC | 15452 | 15453 |
| 174 | <chem>CS(=O)(=O)C1=CC=C(C=C1)C(O)=O</chem>            | ATCCGA | 15531 | 15531 |
| 175 | <chem>OC(=O)C1=CC=CC=C1</chem>                        | ATTGCA | 15468 | 15468 |
| 176 | <chem>OC(=O)C1(CCC1)C1=CC=CC=C1</chem>                | ATTCAT | 15497 | 15497 |
| 177 | <chem>CC1(CCCCC1)C(O)=O</chem>                        | TGACAA | 15497 | 15498 |
| 178 | <chem>CC1(CCCC=C1)C(O)=O</chem>                       | TGAATC | 15486 | 15487 |
| 179 | <chem>OC(=O)C1CN(CC2=CC=CC=C2)C1</chem>               | ATAGAC | 15546 | 15547 |
| 180 | <chem>O[C@@H](C(O)=O)C1=CC=CC=C1</chem>               | ATCAGT | 15498 | 15498 |
| 181 | <chem>O[C@H](C(O)=O)C1=CC=CC=C1</chem>                | GATCGA | 15523 | 15523 |
| 182 | <chem>NC(=O)C1=CC=C(C=C1)C(O)=O</chem>                | GTGCGC | 15528 | 15529 |
| 183 | <chem>CC1=CC=CC(=C1)C(O)=O</chem>                     | GCGCTG | 15499 | 15499 |
| 184 | <chem>CC1=CC=CC=C1C(O)=O</chem>                       | AGATGG | 15547 | 15547 |
| 185 | <chem>OC(=O)C1=CN=CC=C1</chem>                        | CCAGAC | 15452 | 15452 |
| 186 | <chem>OC(=O)C1CCCCC1</chem>                           | TGTGTA | 15505 | 15506 |
| 187 | <chem>CC(C)C(O)C(O)=O</chem>                          | ATGCCT | 15440 | 15440 |
| 188 | <chem>CNC(=O)C1=CC=C(C=C1)C(O)=O</chem>               | TCGCGG | 15542 | 15542 |
| 189 | <chem>CC(=O)N1CCC(CC1)C(O)=O</chem>                   | ATCGGC | 15518 | 15518 |
| 190 | <chem>CC(=O)C1=CC=C(C=C1)C(O)=O</chem>                | AAGCTG | 15535 | 15535 |
| 191 | <chem>COC1=C(OC)C=C(C=C1)C(=O)CCC(O)=O</chem>         | ACTTAT | 15518 | 15518 |
| 192 | <chem>OC(=O)C1=CC(Br)=CC=C1</chem>                    | ACCTGT | 15523 | 15523 |
| 193 | <chem>NS(=O)(=O)C1=CC=C(C=C1)C(O)=O</chem>            | GCGGCA | 15573 | 15574 |
| 194 | <chem>OC(=O)C1=CC=C(I)C=C1</chem>                     | TAGTTG | 15625 | 15625 |
| 195 | <chem>CC(=O)N[C@H](CC1=CC=CC=C1)C(O)=O</chem>         | CAGAAC | 15547 | 15548 |
| 196 | <chem>CC(=O)N[C@@H](CC1=CC=C(O)C=C1)C(O)=O</chem>     | AGGCAT | 15594 | 15594 |
| 197 | <chem>OC(=O)C1CCN(CC1)C(=O)NC1=CC=CC=C1</chem>        | GTTCCA | 15570 | 15570 |
| 198 | <chem>OC(=O)C1=CC=C(C=C1)C#N</chem>                   | ACGACA | 15487 | 15487 |
| 199 | <chem>OC(=O)C1CCC1</chem>                             | CGGATC | 15447 | 15447 |
| 200 | <chem>CC1=NC(=CS1)C(O)=O</chem>                       | AGCACT | 15474 | 15475 |
| 201 | <chem>OC(=O)C1=CSC(=N1)C(F)(F)F</chem>                | TATCCA | 15503 | 15503 |
| 202 | <chem>OC(=O)C1CC2=C(C1)C=CC=C2</chem>                 | CGCACG | 15494 | 15494 |
| 203 | <chem>OC(=O)C[C@H]1NC(=O)[C@@H](CC2=CC=CC=C2)N</chem> | CCATGC | 15569 | 15570 |



|     | C1=O                                                   |        |       |       |
|-----|--------------------------------------------------------|--------|-------|-------|
| 204 | CC1=C(NC(=O)C2=CC=CO2)C=C(C=C1)C(O)=O                  | AACAGG | 15625 | 15626 |
| 205 | CC1=CC=C(NS(=O)(=O)C2=CC=C(C=C2)C(O)=O)C=C1            | CATTAG | 15637 | 15638 |
| 206 | OC(=O)C1=CC(=C(Cl)C=C1)S(=O)(=O)N1CCOCC1               | ATTAAC | 15635 | 15636 |
| 207 | CC1(C)CC2=C(O1)C(OCC(O)=O)=CC=C2                       | AGCATG | 15593 | 15594 |
| 208 | OC(=O)C(CC1=CC=CC=C1)NC(=O)C1=CC=CS1                   | TCGCCA | 15582 | 15583 |
| 209 | CC(C)CC(NC(N)=O)C(O)=O                                 | GAATCA | 15529 | 15530 |
| 210 | NC(=O)N1CCCC1C(O)=O                                    | TGATCT | 15495 | 15496 |
| 211 | OC(=O)C(CC1=CNC2=C1C=CC=C2)NS(=O)(=O)C1=C(C=C(Cl)C=C1) | AACTTA | 15708 | 15709 |
| 212 | CC1=CC=C(CN2CC(CC2=O)C(O)=O)C=C1                       | TCGGTC | 15571 | 15572 |
| 213 | CC1=C(SC2=C1C(=O)NC=N2)C(O)=O                          | ATAGTG | 15596 | 15596 |
| 214 | OC(=O)CN1C=NC=N1                                       | CGCGGT | 15490 | 15490 |
| 215 | CC(C)CN(C(=O)CCC(O)=O)C1=C(N)N(CC(C)C)C(=O)NC1=O       | AACTAG | 15709 | 15710 |
| 216 | CC(C)C(NC(=O)CC1=CC=CC=C1)C(O)=O                       | AGCGAG | 15631 | 15631 |
| 217 | OC(=O)C1CN(CCC2=CC=CC=C2)C(=O)C1                       | CAGTTC | 15555 | 15555 |
| 218 | CC(C)C(NC(=O)NC1=CC=CC=C1)C(O)=O                       | TCTCCG | 15534 | 15535 |
| 219 | OC1CC(N(C1)S(=O)(=O)C1=CC(Cl)=C(Cl)C=C1)C(O)=O         | CCAGGA | 15696 | 15696 |
| 220 | CC(=O)NC1=NC(C(O)=O)=C(Br)C=C1                         | CAGTAT | 15605 | 15605 |
| 221 | OC(=O)C1=C(ON=C1)C1=CC=CC=C1                           | TGGTAG | 15591 | 15592 |
| 222 | CC1=NC(C(O)=O)=C(C)O1                                  | CGCGTG | 15504 | 15505 |
| 223 | OC(=O)C1=CN=C1C1=C(F)C=CC=C1                           | AAGACG | 15586 | 15586 |
| 224 | CN(C1=CC=C(C=C1)C(O)=O)S(=O)(=O)C1=CC=C(C)C=C1         | ATGGAT | 15691 | 15691 |
| 225 | NC1=C(Br)C=C(C=N1)C(O)=O                               | ATATTC | 15538 | 15538 |
| 226 | OC(=O)C1=CC=C(C=C1)S(=O)(=O)NCC=C                      | TGATGA | 15627 | 15628 |
| 227 | OC(=O)CN1NC(=O)C=CC1=O                                 | TGGAGC | 15557 | 15557 |
| 228 | CN1C=C(C(O)=O)C(=N1)C(F)F                              | GCGAGG | 15588 | 15589 |
| 229 | OC(=O)C1CN(C2CC2)C(=O)C1                               | CTTCGG | 15507 | 15508 |
| 230 | OC(=O)C1=CC2=C(N1)C=C(C=C2)C(F)(F)F                    | AGTAGG | 15640 | 15640 |
| 231 | OC(=O)C1=CC=C(C=C1)S(=O)(=O)NC1CC1                     | CTGACA | 15572 | 15573 |
| 232 | OC(=O)C1CCN(CC1)C(=O)C1=CC=CS1                         | CGTTAA | 15585 | 15586 |
| 233 | COC1=C(C=C(C=C1)C(O)=O)S(=O)(=O)NC1CC1                 | AAGTCT | 15617 | 15618 |
| 234 | NC(=O)NC1=CC(=CC=C1)C(O)=O                             | CATCCT | 15462 | 15463 |
| 235 | CC1=NC2=C(C=CC(=C2)C(O)=O)N1C1CC1                      | ACCAGA | 15556 | 15557 |
| 236 | CN1N=C2C=CC=CC2=C1C(O)=O                               | GATGTT | 15553 | 15554 |
| 237 | OC(=O)C1=C(C=C(Cl)C=C1)N1CCCC1=O                       | AGGAGT | 15650 | 15651 |
| 238 | CC1=NC(=C(S1)C(O)=O)C1=CC=CC=C1                        | CTGCTC | 15517 | 15518 |
| 239 | OC(=O)C1=CC2=C(N1)C=CC=C2F                             | GCTACT | 15501 | 15501 |
| 240 | CC1=C(C=C(C=C1)S(=O)(=O)NC1CC1)C(O)=O                  | TGTACA | 15601 | 15602 |
| 241 | OC(=O)C1=C(C=CC=C1)C1=CC=C(C=C1)C(F)(F)F               | CGTAGT | 15628 | 15629 |
| 242 | OC(=O)C1=C(Cl)C=CC(O)=C1                               | TATCAT | 15493 | 15494 |
| 243 | CN1C2=C(N(CC(O)=O)C=N2)C(=O)N(C)C1=O                   | ACCAAT | 15553 | 15554 |
| 244 | CC1=C(C(O)=O)C(=NO1)C1=C(Cl)C=CC=C1F                   | GTTGTC | 15608 | 15609 |
| 245 | OC(=O)[C@@H]1CC(=O)NC(=O)N1                            | ATGTGC | 15520 | 15520 |
| 246 | CC1=C(C(=O)C(O)=O)C2=C(N1)C=CC=C2                      | CCGCCT | 15486 | 15486 |
| 247 | CC1=C(CCC(O)=O)C(=O)NC(=O)N1                           | CGACAT | 15529 | 15529 |
| 248 | NC(=O)NC(CC(O)=O)C1=CC=CS1                             | GCTGGA | 15601 | 15601 |
| 249 | OC(=O)C1(CCCC1)NC(=O)NCC1=CC=CC=C1                     | GCGTGC | 15625 | 15626 |
| 250 | CC(C)C(NC(=O)NCC1=CC=CC=C1)C(O)=O                      | CTCCAG | 15557 | 15558 |
| 251 | OC(=O)C1=CN=C(C=C1)NIC=NC=N1                           | GCTAAC | 15521 | 15522 |
| 252 | OC(=O)C1(CC1)C1=CC(Cl)=CC=C1                           | TTATCA | 15517 | 15518 |
| 253 | CC(C)CN1C(=O)NC(=O)C2=C1N=C(C=C2C(O)=O)C1C=C1          | CGTGTT | 15656 | 15656 |
| 254 | OC(=O)C1=NN(C(=O)C=C1)C1=CC=CC=C1                      | ACACTA | 15531 | 15531 |

|     |                                                    |        |       |        |
|-----|----------------------------------------------------|--------|-------|--------|
| 255 | <chem>CC1=C(N=NNIC1=CC=C(F)C=C1)C(O)=O</chem>      | ATGCAA | 15576 | 15576  |
| 256 | <chem>OC(=O)C1CCCN1C(=O)C1CC1</chem>               | GAGCTC | 15530 | 15530  |
| 257 | <chem>CN1NC(=O)C2=C1NC(=O)C(CC(O)=O)=C2C</chem>    | AGGAAC | 15517 | 15517  |
| 258 | <chem>OC(=O)CCC1=NNC(=O)NC1=O</chem>               | CCGACG | 15517 | 15517  |
| 259 | <chem>CC1=C(CC(O)=O)C(=O)NC(N)=N1</chem>           | ACTCAA | 15498 | 15498  |
| 260 | <chem>OC(=O)C1=NNC2=C1CCC2</chem>                  | CTTATT | 15464 | 15464  |
| 261 | <chem>OC(=O)C1=NNC2=C1CCCC2</chem>                 | ACAGGC | 15536 | 15536  |
| 262 | <chem>CC1=C(C=NC=N1)C(O)=O</chem>                  | TTAAGG | 15524 | 15524  |
| 263 | <chem>CN1C2=C(NC(CCC(O)=O)=N2)C(=O)NC1=O</chem>    | GACTAT | 15584 | 15584  |
| 264 | <chem>OC(=O)C1(CCOCC1)C1=CC=C(F)C=C1</chem>        | GAACAG | 15604 | 15604  |
| 265 | <chem>OC(=O)C1CC1C(=O)N1CCN(CC1)C1=CC=CC=C1</chem> | CCTGCA | 15581 | 15581  |
| 266 | <chem>OC(=O)C1=CC(=CC=C1)N1NC(=O)C=CC1=O</chem>    | CTGAAT | 15578 | 15578  |
| 267 | <chem>NC(=O)C1=CC=C(S1)C(O)=O</chem>               | CGGCCG | 15519 | 15519  |
| 268 | <chem>OC(=O)C1CCCN1C(=O)C1=CC=C(Br)C=C1</chem>     | GAGGAC | 15694 | 15694  |
| 269 | <chem>OC1CC(N(C1)C(=O)C1=CC=C(F)C=C1)C(O)=O</chem> | CACTGT | 15575 | 15575  |
| 270 | <chem>OC(=O)C1=CC=C(C=C1)C(F)F</chem>              | CGACGG | 15544 | 15544  |
| 271 | <chem>OC(=O)CCN1C=CNC(=O)C1=O</chem>               | TATAAG | 15554 | 15554  |
| 272 | <chem>OC(=O)CN1C=C2C=CC=CC2=N1</chem>              | AGTTAG | 15562 | 15562  |
| 273 | <chem>OC(=O)C1=C2C=CC=CN2N=C1</chem>               | ACTAGC | 15493 | 15493  |
| 274 | <chem>CC1=NC(=CN1)C(O)=O</chem>                    | TTGGTA | 15503 | 15503  |
| 275 | <chem>OC(=O)CC1(O)CCCC1</chem>                     | CGCTAC | 15465 | 15466  |
| 276 | <chem>OC(=O)C1(CC1)C1=C(F)C=CC=C1</chem>           | GTTAAT | 15541 | 15541  |
| 277 | <chem>CN1N=C(C(O)=O)C(Br)=C1C</chem>               | ACGAAG | 15599 | 155991 |
| 278 | <chem>CC1=NC(=NO1)C1=CC(=CC=C1)C(O)=O</chem>       | ATAATT | 15549 | 15549  |
| 279 | <chem>OC(=O)C1=C(Br)SC=N1</chem>                   | GTAGAG | 15619 | 15619  |
| 280 | <chem>COC1=C(OC)C=C(C=C1)C1(CCCC1)C(O)=O</chem>    | GTTCGT | 15603 | 15604  |
| 281 | <chem>OC(=O)C1=CNC(=O)C(Br)=C1</chem>              | CGCAGC | 15550 | 1549   |
| 282 | <chem>OC(=O)C(F)(F)F</chem>                        | TACTCA | 15420 | 15420  |
| 283 | [NH2]                                              | CAGACT | 15349 | 15349  |

Supplementary Table 1 | Structures and codons of the 1<sup>st</sup> diversity elements with deconvoluted predicted mass and found mass of the corresponding conjugates.

(e) Deprotection of Nvoc by UV irradiation and assembling of the 1<sup>st</sup> pool.

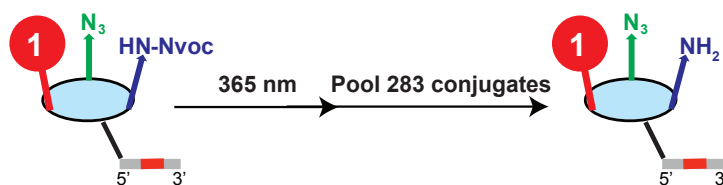

Supplementary Figure 9 | Deprotection of Nvoc by UV irradiation at 365 nm.

The individual conjugates with the first diversity elements were subjected to irradiation at 365 nm for 60 min at 0 °C (on ice). All 283 conjugates were characterized by UPLC-MS and conversion yields exceeded 95 % based on the UPLC UV peak integral of absorption at 260 nm. Equimolar amounts (3 nmol) of the 283 conjugates obtained as described above were combined to generate the 1<sup>st</sup> pool without further purification.

(f) Conjugation of 384 carboxylic acids as second diversity elements (DE-2), encoding by enzymatic ligation, assembling of the 2<sup>nd</sup> pool, purification and characterization.

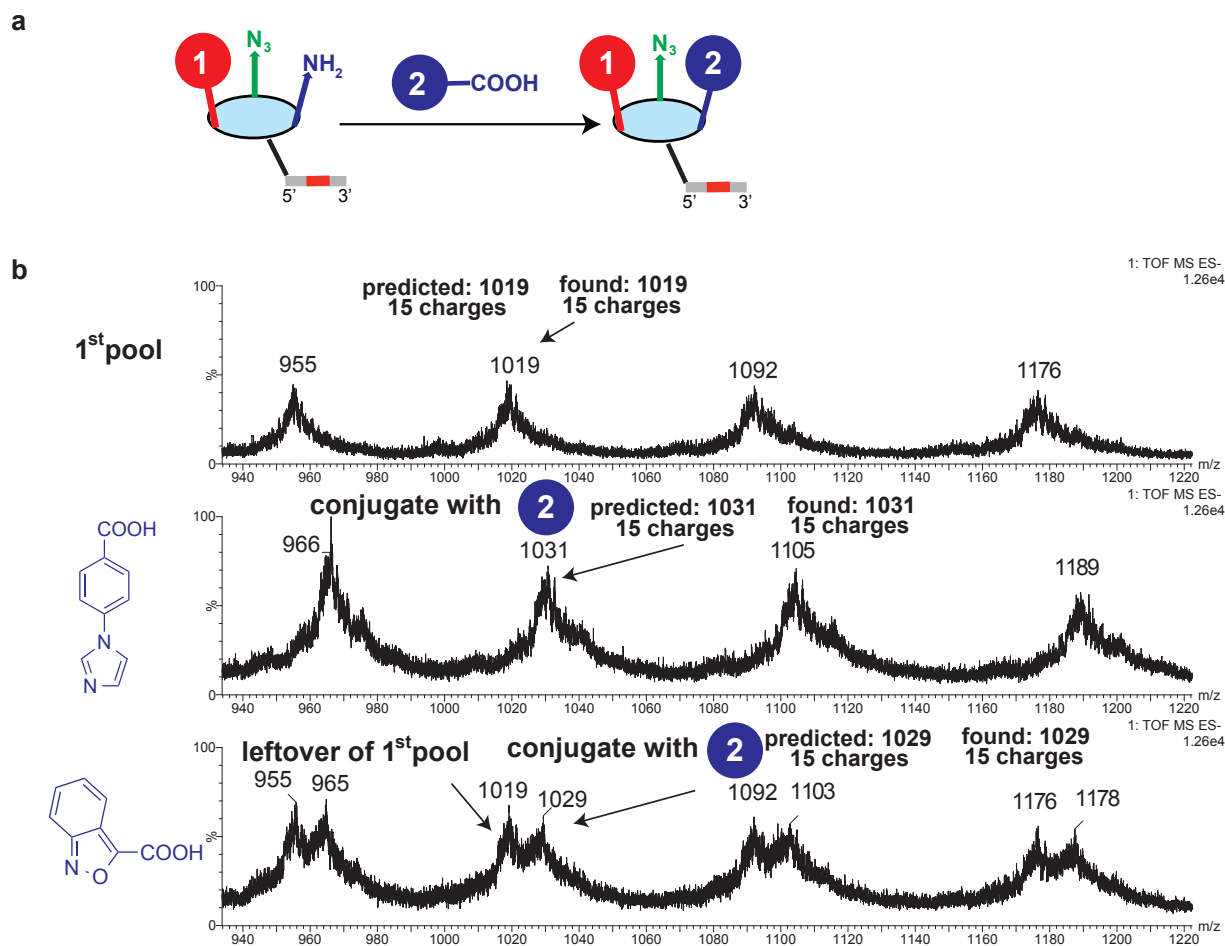

**Supplementary Figure 10 | Conjugation of the 2<sup>nd</sup> diversity elements.** a, Conjugation of 2<sup>nd</sup> diversity elements to 1<sup>st</sup> pool. b, MS spectra of 1<sup>st</sup> pool, conjugates from 1<sup>st</sup> pool coupled to 4-(1*H*-imidazol-1-yl)benzoic acid and conjugates from 1<sup>st</sup> pool coupled to benzo[*c*]isoxazole-3-carboxylic acid, using 50 pmol for injection. MS analyses were performed on a Xevo G2-XS Q-TOF with electrospray ionization source. For 4-(1*H*-imidazol-1-yl)benzoic acid as diversity element, the conversion is over 80 % according to the peak intensity ratio between the conjugates and the starting pool. For benzo[*c*]isoxazole-3-carboxylic acid as diversity element, the conversion is ca. 40 % according to the peak intensity ratio between the conjugates and the starting pool.

The 1<sup>st</sup> pool was further split into 386 aliquots (2 nmol each) and conjugated with 384 carboxylic acids using the same conditions as described above. The DNA-conjugates were isolated by ethanol precipitation and the pellets redissolved in deionized water 200 (μL), the recovery of the conjugates was quantified by UV absorption at 260 nm and the yields determined to be around 60-90 %. All the 384 conjugates were characterized by UPLC-MS and conversion yields were all over

80 % based on the ratio of MS peak intensities of the starting pool (1<sup>st</sup> pool here) and the conjugates from the 2<sup>nd</sup> diversity elements (see Supplementary Fig. 10)<sup>5</sup>.

**a**

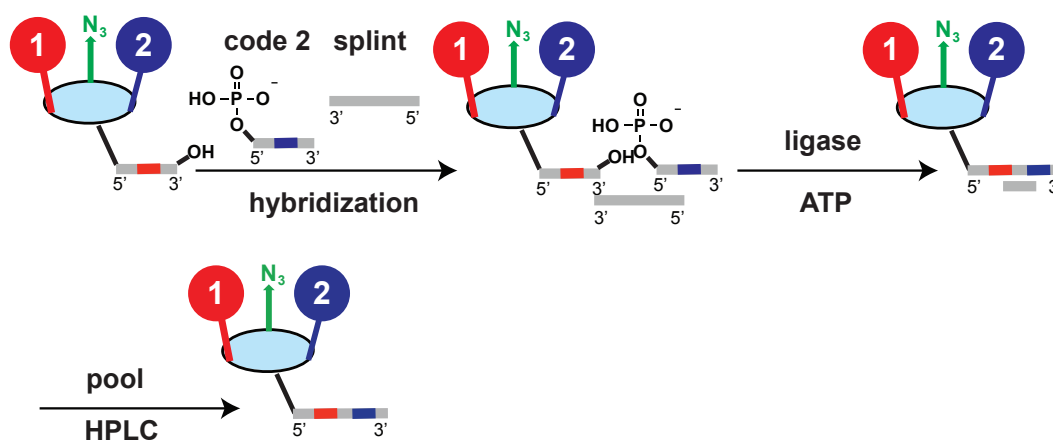

**b**

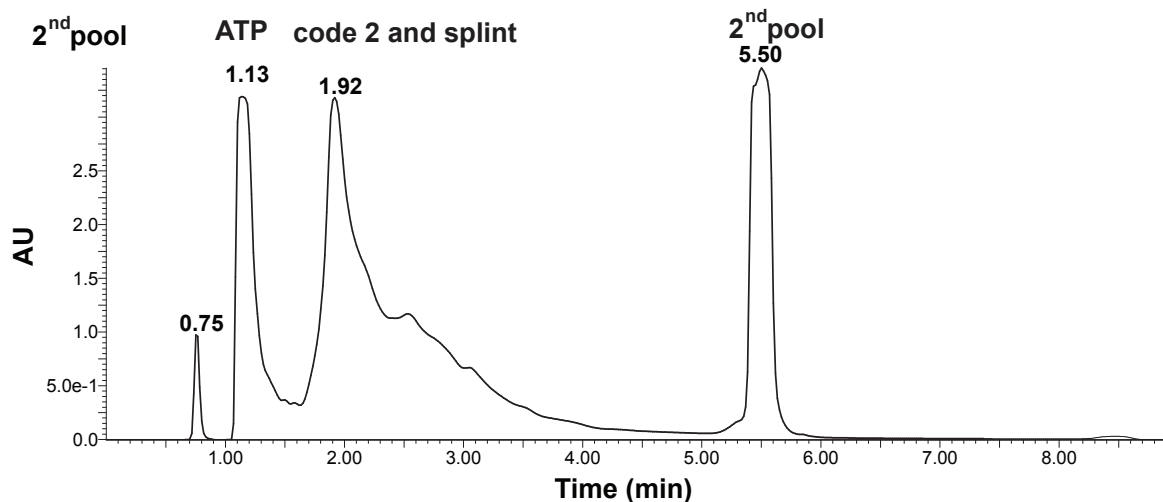

**Supplementary Figure 11 | Encoding of the 2<sup>nd</sup> diversity elements and purification.** **a** Enzymatic encoding for the 2<sup>nd</sup> diversity elements and HPLC purification. **b** Representative HPLC chromatogram for the purification of the 2<sup>nd</sup> pool. HPLC purifications were performed on a CT18-X Terra 10 × 150 mm column at a flow rate of 4 mL/min with gradient: 10 % B (0 to 4 minutes), 60 % B (4.1 to 7 minutes), 10 % B (7.1 to 9 minutes), (A= TEAA 0.1 M in water, B= CH<sub>3</sub>CN 80 % in water), at 65 °C. Detection by absorbance at 260 nm.

Individual conjugates (1.2 nmol, in deionized water 120 μL) with second diversity elements were employed to splint-assisted enzymatic ligation without further purification. To these conjugates, 5'-phosphate-oligos (code 2: 5'-phosphate-CGGATCGACGNNNNNNNGCGTCAGGCAGC-3'-OH, 1.44 nmol, 1.2 equiv.) and splint (5'-OH-CGTCGATCCGGCCCATGGG-3'-OH, 1.8 nmol, 1.5 equiv.) were added, followed with addition of T4 DNA ligase buffer (15 μL, New England BioLabs, Catalog: B0202S) and kept at 65 °C for 10 minutes. After the system cooled down to 22 °C, T4 DNA ligase (1 μL, 400 units, New England BioLabs, Catalog: M0202S) was added and splint-assisted enzymatic ligation reactions stood at 22 °C

for 6 h. The conversion yields were all over 80% based on denaturing PAGE analysis. 384 carboxylic acids and 386 DNA tags were employed as second diversity elements and corresponding barcodes (One extra tag was used to encode “Nvoc-on” and another tag was used to encode “Nvoc-off” [NH<sub>2</sub>]. Equimolar amounts (1.2 nmol) of the 386 conjugates obtained as described above were combined to generate the 2<sup>nd</sup> pool followed with ethanol precipitation. The recovered pellet was redissolved in deionized water (15 mL) and purified by HPLC to remove the splint and excess code 2 (see Supplementary Fig. 11). The HPLC purified 2<sup>nd</sup> pool was dried by lyophilization, redissolved in H<sub>2</sub>O (10 mL), quantified the recovery conjugates by UV absorption at 260 nm and yielded a total of 418 nmol of conjugates. The MS-analysis after splint-assisted enzymatic ligation with code 2 is listed below:

| Number | Smiles                                                     | Codon   | Predicted (Da) | Found (Da) |
|--------|------------------------------------------------------------|---------|----------------|------------|
| 1      | <chem>CC=C/CC(O)=O</chem>                                  | GTCTCAC | 1014           | 1016       |
| 2      | <chem>OC(=O)CCC1CCCC1</chem>                               | GTCGTAC | 1017           | 1018       |
| 3      | <chem>CC(C)(C)CC(O)=O</chem>                               | CTCATTG | 1015           | 1015       |
| 4      | <chem>CC(CC(O)=O)CC(C)(C)C</chem>                          | GTAGAGA | 1021           | 1021       |
| 5      | <chem>CC(CC(O)=O)C=C</chem>                                | GTTACCT | 1015           | 1015       |
| 6      | <chem>CC(=O)[C@@H]1C[C@@H](CC(O)=O)C1(C)C</chem>           | AGTAATT | 1020           | 1020       |
| 7      | <chem>OC(=O)CCC=C</chem>                                   | AGTGAGC | 1017           | 1017       |
| 8      | <chem>CN(C)CC(O)=O</chem>                                  | ACTGATA | 1016           | 1015       |
| 9      | <chem>CCOCCC(O)=O</chem>                                   | ACGTATA | 1016           | 1017       |
| 10     | <chem>OCC(O)=O</chem>                                      | TTCTCCT | 1011           | 1011       |
| 11     | <chem>OC(=O)CNC(=O)C1=CC=CC=C1</chem>                      | AACTGCT | 1018           | 1018       |
| 12     | <chem>OC(=O)CCC1=CC=CC=C1</chem>                           | CACACAC | 1015           | 1015       |
| 13     | <chem>CCCCNC(=O)NCC(O)=O</chem>                            | CACGTGT | 1018           | 1019       |
| 14     | <chem>OC(=O)CCS(=O)(=O)C1=CC=CC=C1</chem>                  | CGAGGTG | 1023           | 1026       |
| 15     | <chem>CC1(C)[C@@H]2CC[C@@]1(C)[C@H](CC(O)=O)[C@H]2O</chem> | AAGCGAG | 1022           | 1023       |
| 16     | <chem>OC(=O)CCOC1=CC=CC=C1</chem>                          | GCGCATG | 1019           | 1021       |
| 17     | <chem>O[C@H](CC(O)=O)C1=CC=CC=C1</chem>                    | GTTGGTC | 1019           | 1020       |
| 18     | <chem>C[C@@H](NC(=O)CCC(O)=O)C1=CC=CC=C1</chem>            | CTTCTCT | 1017           | 1018       |
| 19     | <chem>CN(C)C1=CC=C(CC(O)=O)C=C1</chem>                     | TTGCACG | 1019           | 1019       |
| 20     | <chem>COC1=CC=CC=C1CC(O)=O</chem>                          | GAGTAGA | 1021           | 1021       |
| 21     | <chem>COC1=CC(OC)=C(CCC(O)=O)C=C1</chem>                   | ATGTGAG | 1022           | 1023       |
| 22     | <chem>COC1=CC=CC(CCC(O)=O)=C1OC</chem>                     | AACGTAT | 1020           | 1021       |
| 23     | <chem>CC1=CC=CC=C1C(=O)NCC(O)=O</chem>                     | TCCGGCT | 1018           | 1019       |
| 24     | <chem>CC1=CC(=CC=C1)C(=O)NCC(O)=O</chem>                   | TGATGAT | 1021           | 1021       |
| 25     | <chem>CC1=CC=C(C=C1)C(=O)NCC(O)=O</chem>                   | TGTGGAC | 1021           | 1022       |
| 26     | <chem>CC(O)(CC(O)=O)C(F)(F)F</chem>                        | GTAGTGC | 1020           | 1021       |
| 27     | <chem>OCC1=CC=C(CC(O)=O)C=C1</chem>                        | GCAACAC | 1017           | 1017       |
| 28     | <chem>COC1=CC(CC(O)=O)=CC=C1O</chem>                       | AAGACCG | 1019           | 1020       |
| 29     | <chem>OC(=O)CCC1=CC2=C(OCC2)C=C1</chem>                    | AGAGAGA | 1022           | 1023       |
| 30     | <chem>COC1=CC=C(CC(O)=O)C(OC)=C1OC</chem>                  | TCGAGAT | 1021           | 1022       |
| 31     | <chem>COC1=CC(OC)=NC(CCC(O)=O)=N1</chem>                   | CCGACTT | 1018           | 1019       |
| 32     | <chem>OC(=O)CCC1=CC=CN=C1</chem>                           | TGAGATA | 1019           | 1020       |
| 33     | <chem>OC(=O)CCCC1=CC=C(I)C=C1</chem>                       | TTGGCGT | 1024           | 1026       |
| 34     | <chem>OC(=O)C[C@]12CC3CC(C[C@@](O)(C3)C1)C2</chem>         | AATCCTC | 1017           | 1018       |
| 35     | <chem>COC1=CC(OC)=CC(CCC(O)=O)=C1</chem>                   | CACGTAC | 1019           | 1019       |
| 36     | <chem>CCOC1=CC(CC(O)=O)=CC=C1O</chem>                      | CACACGA | 1018           | 1020       |
| 37     | <chem>COC1=CC2=C(C=C1)C(=O)C(CC(O)=O)C2</chem>             | CGTAACA | 1020           | 1020       |

|    |                                                     |         |      |      |
|----|-----------------------------------------------------|---------|------|------|
| 38 | <chem>OC(=O)CCC1CNC2=C1C=CC=C2</chem>               | AATTCCG | 1018 | 1019 |
| 39 | <chem>COC1=CC=C(Br)C=C1CC(O)=O</chem>               | GCGTTAC | 1021 | 1022 |
| 40 | <chem>CC1=CC=C(F)C=C1CC(O)=O</chem>                 | CTCCATT | 1015 | 1016 |
| 41 | <chem>OC(=O)CC1NC(=O)NC1=O</chem>                   | CGCCGGT | 1018 | 1018 |
| 42 | <chem>OC(=O)CCN1C(=O)OC2=C1C=CC=C2</chem>           | GTAAGAC | 1021 | 1022 |
| 43 | <chem>CC1=CN(CC(O)=O)C(=O)NC1=O</chem>              | GCTGAAT | 1020 | 1020 |
| 44 | <chem>COC1=C(OC)C=C(CC(O)=O)C(Br)=C1</chem>         | ATAAGGT | 1025 | 1025 |
| 45 | <chem>COC1=CC2=C(NC(CC(O)=O)=C2C)C=C1</chem>        | ATCATT  | 1018 | 1020 |
| 46 | <chem>NS(=O)(=O)C1=CC=C(NC(=O)CCC(O)=O)C=C1</chem>  | AGCGAGT | 1024 | 1025 |
| 47 | <chem>COC1=CC=C(CC(O)=O)C=C1O</chem>                | CCAGACT | 1017 | 1018 |
| 48 | <chem>CN1C2N=CN(CC(O)=O)C2C(=O)N(C)C1=O</chem>      | TGACCAG | 1021 | 1023 |
| 49 | <chem>OC(=O)CC1=CC=CC=C1OC1=CC=CC=C1</chem>         | GCCTACA | 1019 | 1020 |
| 50 | <chem>NS(=O)(=O)C1=CC=C(NC(=O)CSCC(O)=O)C=C1</chem> | GCCTCGT | 1023 | 1023 |
| 51 | <chem>CN(CC(O)=O)S(=O)(=O)C1=CC=CC=C1</chem>        | TGTCGTT | 1021 | 1021 |
| 52 | <chem>NC(=O)NCCC(O)=O</chem>                        | GTCTGAA | 1018 | 1018 |
| 53 | <chem>OC(=O)CCCC1=CC=C2OCCOC2=C1</chem>             | CCGTA   | 1019 | 1018 |
| 54 | <chem>OC(=O)CC1OC2=C(NC1=O)C=CC=C2</chem>           | AGGTGTC | 1021 | 1022 |
| 55 | <chem>OC(=O)CC1=CC2=C(N1)C=CC=C2</chem>             | TGCCTGG | 1019 | 1019 |
| 56 | <chem>CC1=C(CC(O)=O)NC2=C1C=CC=C2</chem>            | AGGATGC | 1021 | 1021 |
| 57 | <chem>COC1=C(CO)C=CC(OCC(O)=O)=C1</chem>            | GTTATGC | 1021 | 1021 |
| 58 | <chem>COC1=CC(CC(O)=O)=CC(OC)=C1OC</chem>           | GTAGGAA | 1024 | 1024 |
| 59 | <chem>OC(=O)CCC1=CC2=C(OC2)C=C1</chem>              | GTGTCGT | 1020 | 1021 |
| 60 | <chem>OC(=O)CCC1=NC(=NO1)C1=C(F)C=CC=C1</chem>      | GCTCCTT | 1019 | 1019 |
| 61 | <chem>CC1=CC=C(C=C1)C(=O)CCC(O)=O</chem>            | TTCTGAG | 1020 | 1020 |
| 62 | <chem>OC(=O)CCC(=O)C1=CC=CC=C1</chem>               | TCATGGA | 1019 | 1019 |
| 63 | <chem>COC1=C(CCC(O)=O)C=CC=C1</chem>                | ATCGTAA | 1019 | 1019 |
| 64 | <chem>OC(=O)CCC1=CC(=O)C2=C(O1)C=CC(F)=C2</chem>    | GACTTAT | 1021 | 1021 |
| 65 | <chem>OC(=O)CCC1=CC(=O)C2=C(O1)C=CC(Br)=C2</chem>   | CAACGTT | 1023 | 1023 |
| 66 | <chem>OC(=O)CCC1=NN=C(O1)C1=CC=CC=C1</chem>         | CGATACT | 1019 | 1020 |
| 67 | <chem>OC(=O)CCC1=CC=CS1</chem>                      | TACGATG | 1019 | 1019 |
| 68 | <chem>OC(=O)CC1=CSC=C1</chem>                       | CCAGTGT | 1017 | 1018 |
| 69 | <chem>OC(=O)CCC(=O)C1=CC=CS1</chem>                 | CCTGGTG | 1019 | 1020 |
| 70 | <chem>COC1=CC=C(C=C1F)C(=O)CCC(O)=O</chem>          | CCAGTTG | 1020 | 1020 |
| 71 | <chem>COC1=CC=C(C=C1)C(=O)CCC(O)=O</chem>           | TCATCGT | 1019 | 1019 |
| 72 | <chem>OC(=O)CCC1=C(Cl)C=C(Cl)C=C1</chem>            | ATATATC | 1019 | 1020 |
| 73 | <chem>OC(=O)CCC(=O)C1=CC=C(F)C=C1</chem>            | GTGCCGA | 1020 | 1021 |
| 74 | <chem>OC(=O)CCC(=O)C1=CC(F)=CC(F)=C1</chem>         | CAGACCA | 1019 | 1020 |
| 75 | <chem>OC(=O)CCC(=O)C1=CC=C(Cl)C=C1</chem>           | CGATTGC | 1020 | 1021 |
| 76 | <chem>OC(=O)COC1=CC=C(Cl)C=C1</chem>                | TACCTAC | 1017 | 1017 |
| 77 | <chem>OC(=O)CC1CCC=C1</chem>                        | GATGAGC | 1018 | 1019 |
| 78 | <chem>OC(=O)CCN1C(=O)COC2=C1C=C(Cl)C=C2</chem>      | CAGGTTC | 1022 | 1022 |
| 79 | <chem>OC(=O)CCN1C(=O)COC2=C1C=CC=C2</chem>          | ATAACTA | 1020 | 1020 |
| 80 | <chem>CCC1CCC(CC1)C(=O)NCC(O)=O</chem>              | ACGTCCG | 1019 | 1020 |
| 81 | <chem>OC(=O)CCC1NC(=O)NC1=O</chem>                  | GTGCATA | 1019 | 1020 |
| 82 | <chem>CC1=NC2=C(C=CC=C2)N1CCC(O)=O</chem>           | GAATCAA | 1020 | 1021 |
| 83 | <chem>OC(=O)CCC1=NC(=NO1)C1=CN=CC=C1</chem>         | ACTTGCG | 1020 | 1021 |
| 84 | <chem>OC(=O)CCN1C=CC(=O)NC1=O</chem>                | TGTTCTG | 1019 | 1019 |
| 85 | <chem>CC(=O)C1=C(C)N(CCC(O)=O)N=C1C</chem>          | CCTCCGC | 1017 | 1017 |
| 86 | <chem>CC1=CC2=C(C=C1)C(CC(O)=O)C(=O)N2</chem>       | CTCATAT | 1018 | 1018 |
| 87 | <chem>OC(=O)CCC(=O)NC1CCCCC1</chem>                 | CTGAAGG | 1022 | 1023 |
| 88 | <chem>CN(C1CCCC1)C(=O)CCC(O)=O</chem>               | TCTAGCT | 1019 | 1020 |
| 89 | <chem>COC1=CC=CC=C1C1=NOC(CCCC(O)=O)=N1</chem>      | TTCCTGT | 1021 | 1021 |
| 90 | <chem>OC(=O)CCC1=NC(=NO1)C1=CC=CO1</chem>           | GACTGGA | 1022 | 1022 |
| 91 | <chem>CC1=C(C=CC=C1)C1=NOC(CCC(O)=O)=N1</chem>      | TTAACCG | 1020 | 1021 |
| 92 | <chem>CC1=CC=C2N=C(C)C=C(C(O)=O)C2=C1</chem>        | AGACTGA | 1021 | 1021 |

|     |                                              |         |      |      |
|-----|----------------------------------------------|---------|------|------|
| 93  | OC(=O)C1=NC2=CC=CC=C2C=C1                    | ATCTTGC | 1017 | 1018 |
| 94  | OC(=O)C1=C2C=CC=NC2=CC=C1                    | CTAAGGC | 1019 | 1019 |
| 95  | OC(=O)C1=C2C=CN=CC2=CC=C1                    | ATCGCAT | 1018 | 1018 |
| 96  | OC(=O)C1=NC=CC2=CC=CC=C12                    | AAGTCCA | 1018 | 1019 |
| 97  | OC(=O)C1=CN=C2C=CC=CN2C1=O                   | CATTACG | 1018 | 1019 |
| 98  | OC(=O)C1=CC2=CC(F)=CC=C2N1                   | ATAGCCT | 1018 | 1018 |
| 99  | OC(=O)C1=CC=C2NC=CC2=C1                      | CCAGGTA | 1018 | 1019 |
| 100 | OC(=O)C1=CC=C2C=CNC2=C1                      | AGTAGTA | 1020 | 1021 |
| 101 | OC(=O)C1=CC2=C(N1)C=CC(O)=C2                 | TATGGAG | 1021 | 1022 |
| 102 | COC1=CC=C2NC(=CC2=C1)C(O)=O                  | AGCACGA | 1020 | 1019 |
| 103 | OC(=O)CN1C=C(C(=O)C2CC2)C2=CC=CC=C1<br>2     | AATTGCA | 1022 | 1022 |
| 104 | CN1C=CC2=CC(=CC=C12)C(O)=O                   | CAGATTG | 1019 | 1020 |
| 105 | OC(=O)C1=CC2=CC=CC=C2N1                      | GTCCAAG | 1018 | 1019 |
| 106 | CN1N=C(C(O)=O)C2=CC=CC=C12                   | ATGCGCT | 1018 | 1019 |
| 107 | OC(=O)C1=CC=C2NC=NC2=C1                      | ACATAGT | 1018 | 1019 |
| 108 | OC(=O)C1=CC=C(CN2C=NC3=CC=CC=C23)C<br>=C1    | ATAGAGC | 1023 | 1023 |
| 109 | CC(CC1=CC=C2OCOC2=C1)C(O)=O                  | TATGTCG | 1020 | 1021 |
| 110 | OC(=O)C1=CC=C2OCOC2=C1                       | TATCATT | 1017 | 1018 |
| 111 | OC(=O)C1=NC2=C(C=CC=C2)N=C1                  | CCTTCCG | 1016 | 1016 |
| 112 | OC(=O)C1=CC2=C(C=C1)N=CC=N2                  | TGCGTCG | 1019 | 1019 |
| 113 | CC1=NC(C)=C(CC(O)=O)C(O)=N1                  | AGAAGTG | 1115 | 1115 |
| 114 | OC(=O)C1=CN=C(N=C1)C1=CC=CS1                 | CGTAGGA | 1022 | 1022 |
| 115 | OC(=O)C1=CN=C(N=C1)N1CCOCC1                  | TCCGGTC | 1019 | 1019 |
| 116 | COC1=CC(C(O)=O)=C(OC)N=N1                    | ACGATCA | 1018 | 1019 |
| 117 | OC(=O)C1=C2C(=CC=C1)C(=O)C1=C2C=CC=<br>C1    | TCGTACA | 1020 | 1020 |
| 118 | OC(=O)CCNC(=O)NC12CC3CC(CC(C3)C1)C2          | CTATTAT | 1021 | 1023 |
| 119 | OC(=O)C12CC3CC(CC(C1)C3)C1)C2                | CGCAGGC | 1020 | 1021 |
| 120 | OC(=O)C1=NNC(=C1)C1CC1                       | TAGCTTC | 1016 | 1017 |
| 121 | OC(=O)C1=CC2=C(O1)C=CC=C2                    | CCTTCTC | 1014 | 1015 |
| 122 | COC1=CC=CC2=C1OC(=C2)C(O)=O                  | CTGGCCG | 1019 | 1020 |
| 123 | OC(=O)C1=CC2=C(OC=C2)C=C1                    | GTCGAGC | 1019 | 1019 |
| 124 | CC1=C(C=C(O1)S(=O)(=O)N1CCOCC1)C(O)=<br>O    | TAGATTA | 1023 | 1024 |
| 125 | OC(=O)C1=CN2C=CSC2=N1                        | TTGATAC | 1018 | 1018 |
| 126 | OC(=O)C1=CC=C(C=C1)N1C=CN=C1                 | GCACAAT | 1019 | 1019 |
| 127 | C[C@H]1CC[C@@H](CC1)C(O)=O                   | GCTTGAG | 1019 | 1019 |
| 128 | CC1=NC2=CC=C(C=C2N=C1)C(O)=O                 | TACTTGG | 1020 | 1022 |
| 129 | OC(=O)CC1CCN(CC2=CC=CC=C2)CC1                | CCACATA | 1019 | 1021 |
| 130 | OC(=O)C1CCN(CC1)C(=O)C1=CC=C(F)C=C1          | GACAGTC | 1022 | 1023 |
| 131 | COC1=CC=CC(OC)=C1C(=O)N1CCC(CC1)C(<br>O)=O   | CGCGTTA | 1023 | 1024 |
| 132 | COC1=CC(=CC(OC)=C1)C(=O)N1CCC(CC1)C(<br>O)=O | ATCTCCG | 1022 | 1022 |
| 133 | OC(=O)CN1C=C(Cl)C(=O)C(Cl)=C1                | CTTGCAC | 1019 | 1019 |
| 134 | OC(=O)CN1C=C(I)C(=O)C(I)=C1                  | TGTCACT | 1027 | 1027 |
| 135 | CCCC(=O)C1=CN(CC(O)=O)C2=CC=CC=C12           | GTGCGTG | 1024 | 1024 |
| 136 | OCCN1C=NC2=CC(=CC=C12)C(O)=O                 | ACGCATC | 1018 | 1019 |
| 137 | CC1=CC=C2NC(=O)C(CC(O)=O)C2=C1               | GACGCGT | 1021 | 1021 |
| 138 | CC1=CC(=O)N(CC(O)=O)C2=CC=CC=C12             | AGCGACG | 1022 | 1022 |
| 139 | OC(=O)C1=CC=C(C=C1)C1=NN=NN1                 | GCCGTAG | 1113 | 1114 |
| 140 | OC(=O)C1=CC(=CC=C1)C1=NN=NN1                 | CTCAGCA | 1110 | 1111 |
| 141 | OC(=O)C1=CC=C(CN2C=NN=N2)C=C1                | CTTACCA | 1017 | 1019 |
| 142 | CC(C)C1=CC(=NO1)C(O)=O                       | GCAGGTG | 1020 | 1021 |
| 143 | CN1C=CC(=C1)C1=CC(=NO1)C(O)=O                | CCGGCTG | 1020 | 1020 |
| 144 | OCCC1=CN2N=C(C=C2N=C1)C(O)=O                 | CAACAAC | 1018 | 1019 |

|     |                                              |         |      |      |
|-----|----------------------------------------------|---------|------|------|
| 145 | OC(=O)C1=CC=C(CN2C=CC=N2)O1                  | CGTTCAG | 1019 | 1020 |
| 146 | OC(=O)C1CCN(CC2=CC=CO2)CC1                   | CCACGAA | 1019 | 1019 |
| 147 | CC1=NN(CC(O)=O)C(=O)C2=CC=CC=C12             | CGGAGAG | 1023 | 1024 |
| 148 | OC(=O)C12CC3CC(CC(C3)(C1)N1C=NC=N1)C<br>2    | GTCATGA | 1022 | 1023 |
| 149 | CC1=CC=C(C=C1)N(CC(O)=O)S(C)(=O)=O           | ACTGACG | 1022 | 1022 |
| 150 | OC(=O)C1C2CC(C=C2)C1C(=O)NC1CC1              | TGACGGA | 1022 | 1023 |
| 151 | OC(=O)C1=CN=C(N=C1)C1=CC=CN=C1               | TCTTATT | 1018 | 1019 |
| 152 | CC1=CC=CN2C(CC(O)=O)=CN=C12                  | ATACTAC | 1018 | 1018 |
| 153 | CC1=CC=C(C=C1N1CCNC1=O)C(O)=O                | TAGCCGT | 1020 | 1021 |
| 154 | OC(=O)[C@@H]1C[C@H]1C1=CC=CC=C1              | TCCACGG | 1017 | 1018 |
| 155 | OC(=O)C1COC2=CC=CC=C2O1                      | CGGCTTC | 1018 | 1018 |
| 156 | CN1[C@@H]([C@H](CC1=O)C(O)=O)C1=CN<br>=CC=C1 | TGTGCTT | 1020 | 1021 |
| 157 | CC(C)[C@H]1CC[C@@H](CC1)C(O)=O               | TTGTCTT | 1017 | 1018 |
| 158 | OC(=O)[C@@H]1CCC(=O)N1                       | ATAGTCA | 1017 | 1017 |
| 159 | O[C@@H]1CC(=C[C@@H](O)[C@H]1O)C(O)<br>=O     | TGGAGTA | 1021 | 1021 |
| 160 | OCC(C(O)=O)C1=CC=CC=C1                       | CGGATGG | 1021 | 1021 |
| 161 | OC(=O)[C@@H]1CSC(=O)N1                       | GCTACCA | 1016 | 1016 |
| 162 | CC1(C)C(C(O)=O)C1(C)C                        | ACAACGA | 1017 | 1018 |
| 163 | COC1=CC=C2OC(=CC2=C1)C(O)=O                  | TTGATGA | 1021 | 1021 |
| 164 | OC(=O)C1=CC2=CC(C1)=CC=C2O1                  | GAGCCGC | 1020 | 1020 |
| 165 | CC(C)CN1CC(CC1=O)C(O)=O                      | GATTAAT | 1020 | 1020 |
| 166 | COC1=CC=CC(=C1)N1C=C(C=N1)C(O)=O             | GATGCGG | 1023 | 1023 |
| 167 | OC(=O)C1CN(C2CCCC2)C(=O)C1                   | TAACGTA | 1020 | 1019 |
| 168 | CCCN1CCC(CC(O)=O)CC1                         | ACGCGTT | 1019 | 1020 |
| 169 | COC1=C2OCC(CC2=CC=C1)C(O)=O                  | CGGCCGT | 1020 | 1019 |
| 170 | CC1=CC(C)=C(C(O)=O)C(=O)N1                   | ATGGTTA | 1020 | 1019 |
| 171 | CCCN1N=CC(C(O)=O)=C1C                        | GTCGCCG | 1018 | 1019 |
| 172 | OC(=O)C1=CC=C(NC(=O)C2CCC=CC2)C=C1           | TACGTCA | 1021 | 1021 |
| 173 | CCC(N1C=CC=N1)C(O)=O                         | AGCTCTT | 1016 | 1017 |
| 174 | CC(C)C1=NC(C)=C(S1)C(O)=O                    | CATTGTT | 1018 | 1019 |
| 175 | CC(C)C1=CC(=NC2=NC=NN12)C(O)=O               | ACAGGAA | 1021 | 1022 |
| 176 | OC(=O)C1CCN(CC1)C(=O)C1CCCC1                 | TCTATGC | 1019 | 1021 |
| 177 | CCC(=O)N1CCCC(C1)C(O)=O                      | TAATACA | 1018 | 1019 |
| 178 | OC(=O)C1=CC=CC=C1N1CCC(=O)NC1=O              | TACTCGA | 1020 | 1021 |
| 179 | OC(=O)C1=NOC(=C1)C1=CC=CC=C1                 | TGTCTAG | 1020 | 1020 |
| 180 | CC(CC(O)=O)N1N=C(C)C(C(C)=O)=C1C             | TTCGCTC | 1018 | 1019 |
| 181 | OC(=O)CCCC1=NC(=NO1)C1=CC=NC=C1              | GCTCAGT | 1021 | 1021 |
| 182 | OC(=O)C1=CC(NC(=O)C2CCCC2)=CC=C1             | TACAGGA | 1022 | 1023 |
| 183 | CN(C)C(=O)N1CCC(CC1)C(O)=O                   | CCGGAAG | 1021 | 1022 |
| 184 | CC1=CC(C)=C2C(CC(O)=O)C(=O)NC2=C1            | CCACGCT | 1018 | 1018 |
| 185 | CC1=C(C)N2C(S1)=NC=C(C(O)=O)C2=O             | AGATAAG | 1023 | 1023 |
| 186 | OC(=O)C1CCCC1                                | ATCAGAC | 1016 | 1016 |
| 187 | OC(=O)C1=CC(Br)=C(Br)O1                      | ATCTCAA | 1021 | 1022 |
| 188 | CN(C)S(=O)(=O)C1=CC(C(O)=O)=C(C)O1           | GTAActC | 1020 | 1021 |
| 189 | OC(=O)C1=COC=C1                              | ACAGTAG | 1017 | 1018 |
| 190 | OC(=O)C1=C(Cl)SC(Cl)=C1                      | CGCTGTA | 1019 | 1021 |
| 191 | OC(=O)C1=CC=C(Cl)S1                          | GAGCCAT | 1018 | 1019 |
| 192 | CC1=NC(C)=C(S1)C(O)=O                        | ACTCTTG | 1017 | 1018 |
| 193 | CC1=C(SC(=N1)C1=CC=NC=C1)C(O)=O              | TGTAGAG | 1023 | 1024 |
| 194 | CN1N=C(C=C1C(O)=O)C(C)(C)C                   | AGAACAA | 1020 | 1020 |
| 195 | CN1C=CC=C1C(O)=O                             | ATCTACT | 1015 | 1015 |
| 196 | OC(=O)C1=CC=C(N=C1)C(F)(F)F                  | GATAACG | 1020 | 1021 |
| 197 | CC1=CC=CN=C1C(O)=O                           | TTACGCT | 1016 | 1016 |
| 198 | OC(=O)C1=CN=CC(O)=C1                         | TAGACGA | 1018 | 1019 |
| 199 | OC(=O)C1=C(OC2=CC=CC=C2)N=CC=C1              | AAGCATG | 1021 | 1022 |



|     |                                                          |          |      |      |
|-----|----------------------------------------------------------|----------|------|------|
| 200 | <chem>OC(=O)C1=CC=C(Br)C=N1</chem>                       | GACTTCA  | 1019 | 1019 |
| 201 | <chem>OC(=O)C1=CC(=CN=C1)C1=CC=CS1</chem>                | ATGTGTT  | 1021 | 1021 |
| 202 | <chem>CC(C)OC1=CC=C(C=C1)C(O)=O</chem>                   | GTATGGA  | 1021 | 1022 |
| 203 | <chem>OC(=O)C1=C2C=CC=CC2=CC=C1</chem>                   | CGGTAA   | 1019 | 1021 |
| 204 | <chem>OC(=O)C1=CC=C(OC2=CC=CC=C2)C=C1</chem>             | TTACGAG  | 1021 | 1021 |
| 205 | <chem>CC(=O)NC1=CC=C(C=C1NC(C)=O)C(O)=O</chem>           | ATTCTGG  | 1022 | 1022 |
| 206 | <chem>COC1=CC(=CC(OC)=C1)C(O)=O</chem>                   | CTATGCG  | 1019 | 1019 |
| 207 | <chem>CN(C)C1=CC=CC(=C1)C(O)=O</chem>                    | CCGTAT   | 1017 | 1017 |
| 208 | <chem>COC1=CC(=CC(OC)=C1OC)C(O)=O</chem>                 | ACGCTGT  | 1020 | 1020 |
| 209 | <chem>OC(=O)C1=CC(=CC=C1)C(F)(F)F</chem>                 | CTAGTGA  | 1020 | 1020 |
| 210 | <chem>OC(=O)C1=CC(Cl)=C(F)C=C1</chem>                    | TTACAGG  | 1019 | 1020 |
| 211 | <chem>OC(=O)C1=CC(Cl)=C(Cl)C=C1</chem>                   | GTAGCCA  | 1019 | 1020 |
| 212 | <chem>OC(=O)C1=CC=C(F)C(F)=C1</chem>                     | CCTGTCTG | 1017 | 1016 |
| 213 | <chem>OC(=O)C1=C(F)C(=CC=C1)C(F)(F)F</chem>              | GCACGTC  | 1019 | 1020 |
| 214 | <chem>OC(=O)C1=CC=C(Cl)C=C1</chem>                       | TTGGCTA  | 1018 | 1019 |
| 215 | <chem>COC1=CC2=CC=C(C=C2C=C1)C(O)=O</chem>               | TTAAGTG  | 1021 | 1022 |
| 216 | <chem>NC(=O)COC1=CC=CC(=C1)C(O)=O</chem>                 | TAGGAAC  | 1021 | 1021 |
| 217 | <chem>OC(=O)C1=NNC(=O)C=C1</chem>                        | GTGATGG  | 1020 | 1021 |
| 218 | <chem>OC(=O)C1=CN=CN=C1</chem>                           | ACAAGAG  | 1018 | 1018 |
| 219 | <chem>CN(CCC(O)=O)C1CCN(C)C1</chem>                      | ACATGAT  | 1019 | 1020 |
| 220 | <chem>CC1(CC(O)=O)N2C=CC=CC2=NC1=O</chem>                | TTGCCTG  | 1019 | 1019 |
| 221 | <chem>CC1=NNC(=C1)C(O)=O</chem>                          | GAGTCTT  | 1017 | 1017 |
| 222 | <chem>OC(=O)C1=CC=NN1</chem>                             | CGCGGAG  | 1018 | 1018 |
| 223 | <chem>OC(=O)C1=CN=C1</chem>                              | ATCTGTC  | 1015 | 1015 |
| 224 | <chem>OC(=O)C1=C(N=CC=N1)C(=O)N1CCCC1</chem>             | CGTAGTG  | 1023 | 1023 |
| 225 | <chem>CC1=CC=CC2=NC(=O)CC(C)(N12)C(O)=O</chem>           | GAGCAGG  | 1023 | 1024 |
| 226 | <chem>OC(=O)C1C2OC3(CN(CC4=NC=CC=C4)C(=O)C13)C=C2</chem> | AGCTGAA  | 1024 | 1025 |
| 227 | <chem>CN1C(=O)C(=NC2=C1C=CC=C2)C(O)=O</chem>             | TCGCCGC  | 1018 | 1018 |
| 228 | <chem>CC1=NOC2=NC(=CC(C(O)=O)=C12)C1CC1</chem>           | CGCCTGC  | 1019 | 1020 |
| 229 | <chem>OC(=O)C1=CC2=C(NC(=O)C(=O)N2)C=C1</chem>           | AACGACT  | 1112 | 1114 |
| 230 | <chem>OC(=O)C1CCC=CC1</chem>                             | GCGTATT  | 1017 | 1017 |
| 231 | <chem>CC1=NN2C(=C1)N=CC(C(O)=O)=C2C</chem>               | CACGGTC  | 1018 | 1019 |
| 232 | <chem>OC(=O)C1=CC=C(OC2=CC=CN=C2)O1</chem>               | GAGCAAC  | 1020 | 1021 |
| 233 | <chem>CS(=O)(=O)C1=CC=CC(=C1)C(O)=O</chem>               | ATTAAGT  | 1020 | 1021 |
| 234 | <chem>CS(=O)(=O)C1=CC=C(C=C1)C(O)=O</chem>               | GAGTATG  | 1022 | 1023 |
| 235 | <chem>CC(C)(C)C(O)=O</chem>                              | CCTTGGC  | 1014 | 1017 |
| 236 | <chem>CC1(CC1)C(O)=O</chem>                              | CTTCTC   | 1012 | 1012 |
| 237 | <chem>CC1(CCCCC1)C(O)=O</chem>                           | TTGGTCG  | 1018 | 1019 |
| 238 | <chem>OC(=O)C1CN(CC2=CC=CC=C2)C1</chem>                  | GTGGCTT  | 1020 | 1022 |
| 239 | <chem>NC(=O)C1=CC=C(C=C1)C(O)=O</chem>                   | TCAACTC  | 1016 | 1016 |
| 240 | <chem>CC1=CC=C(C=C1)C(O)=O</chem>                        | GTGAGTC  | 1018 | 1020 |
| 241 | <chem>OC(=O)C1=CN=CC=C1</chem>                           | AATGATG  | 1018 | 1019 |
| 242 | <chem>COC1=CC=C(C=C1)C(O)=O</chem>                       | CCAGCTC  | 1015 | 1016 |
| 243 | <chem>COC1=CC=CC(=C1)C(O)=O</chem>                       | AACAAGG  | 1019 | 1019 |
| 244 | <chem>OC(=O)C(O)(C1=CC=CC=C1)C1=CC=CC=C1</chem>          | GCTGCCG  | 1021 | 1022 |
| 245 | <chem>CNC(=O)C1=CC=C(C=C1)C(O)=O</chem>                  | TTGTCCG  | 1018 | 1019 |
| 246 | <chem>CC(=O)N1CCC(CC1)C(O)=O</chem>                      | GCGTAGG  | 1021 | 1021 |
| 247 | <chem>OC(=O)CN1C=NC2=C(C=CC=C2)C1=O</chem>               | GAACCTG  | 1020 | 1020 |
| 248 | <chem>CC(C)(O)C(O)=O</chem>                              | AGGTAGG  | 1019 | 1020 |
| 249 | <chem>OC(=O)C1=CC=C(Br)O1</chem>                         | CAATATT  | 1018 | 1019 |
| 250 | <chem>NS(=O)(=O)C1=CC=C(C=C1)C(O)=O</chem>               | ATCACTG  | 1019 | 1019 |
| 251 | <chem>OC(=O)C1=CC=C(I)C=C1</chem>                        | CAACGAG  | 1022 | 1023 |
| 252 | <chem>CC(=O)N[C@H](CC1=CNC2=C1C=CC=C2)C(O)=O</chem>      | CGAACGC  | 1021 | 1023 |
| 253 | <chem>CC(=O)N[C@@H](CC1=CC=CC=C1)C(O)=O</chem>           | GCTCGCT  | 1019 | 1019 |
| 254 | <chem>CC(=O)N[C@H](CC1=CC=C(O)C=C1)C(O)=O</chem>         | TAAC TAG | 1021 | 1021 |

|     |                                                              |         |      |      |
|-----|--------------------------------------------------------------|---------|------|------|
| 255 | CC(=O)N[C@@H](CC1=CC=C(O)C=C1)C(O)=O                         | CTTCTAC | 1018 | 1018 |
| 256 | CC(=O)N[C@@H](CC(N)=O)C(O)=O                                 | ATATGCT | 1018 | 1018 |
| 257 | CC(=O)N[C@@H](CCC(N)=O)C(O)=O                                | GCAAGCT | 1019 | 1020 |
| 258 | C[N](C)(C)CCCC(O)=O                                          | CGTGATT | 1018 | 1018 |
| 259 | CC1=CC2=C(NC(=O)C2CC(O)=O)C=C1                               | CCGAATC | 1018 | 1019 |
| 260 | OC(=O)C1=CN=C(Br)C=C1                                        | TCAGGCG | 1021 | 1021 |
| 261 | OC(=O)C1CCCN(C1)C(=O)NC1=CC=CC=C1                            | CATGCGT | 1021 | 1022 |
| 262 | OC(=O)C1=CC=C(C=C1)C#N                                       | TGGAAGC | 1019 | 1020 |
| 263 | OC(=O)C1CCC1                                                 | CTTAACT | 1014 | 1014 |
| 264 | CC1=NC(=CS1)C(O)=O                                           | AAGGCGT | 1019 | 1019 |
| 265 | OC(=O)C1CC2=C(C1)C=CC=C2                                     | AGGTTCT | 1018 | 1019 |
| 266 | OC(=O)C[C@H]1NC(=O)[C@@H](CC2=CC=C(C=C2)NC1=O)               | TTACAAT | 1021 | 1022 |
| 267 | CC1=C(NC(=O)C2=CC=CO2)C=C(C=C1)C(O)=O                        | CGACGAC | 1021 | 1023 |
| 268 | OC(=O)C1=CC(=CC=C1)S(=O)(=O)NC1=C(Cl)C=CC=C1                 | CGTGAAG | 1119 | 1120 |
| 269 | CC1CN(CC(C)O1)S(=O)(=O)C1=CC=C(C=C1)C(O)=O                   | ACACCGG | 1023 | 1024 |
| 270 | COC1=C(C=CC=C1)N(C)S(=O)(=O)C1=CC=C(C=C1)C(O)=O              | AACCTTA | 1023 | 1024 |
| 271 | CC1(C)CC2=C(O1)C(OCC(O)=O)=CC=C2                             | AGTTCGG | 1022 | 1023 |
| 272 | OC(=O)C(CC1=CC=CC=C1)NC(=O)C1=CC=C(C=C1)S1                   | TGATTCT | 1022 | 1023 |
| 273 | CCC(C)C(NC(N)=O)C(O)=O                                       | CTCGAGT | 1018 | 1019 |
| 274 | NC(=O)N1CCCC1C(O)=O                                          | TACACTC | 1015 | 1016 |
| 275 | OC(=O)C=C(C(=O)C1=CC(F)=C(F)C=C1)                            | CGTGTAC | 1020 | 1021 |
| 276 | CC1=C(SC2=C1C(=O)NC=N2)C(O)=O                                | CCGCTGA | 1112 | 1112 |
| 277 | CC1=NN(C(C)=C1\C=C\C(O)=O)C1=CC=CC=C1                        | ACGCGCA | 1021 | 1021 |
| 278 | OC(=O)CN1C=NC=N1                                             | GCCGCTT | 1015 | 1016 |
| 279 | COCCN1C(CCC(O)=O)=NC2=C1C(=O)NC(=O)N2CC(C)C                  | CACCTCT | 1022 | 1022 |
| 280 | CC1=CC=C(C=C1)S(=O)(=O)N(CC(O)=O)CC(O)=O                     | GCTTCAC | 1114 | 1115 |
| 281 | OC(=O)C1CN(CCC2=CC=CC=C2)C(=O)C1                             | GACCAGC | 1021 | 1021 |
| 282 | CC(C)C(NC(=O)NC1=CC=CC=C1)C(O)=O                             | TCTTCAG | 1020 | 1020 |
| 283 | OC1CC(N(C1)S(=O)(=O)C1=CC(Cl)=C(Cl)C=C1)C(O)=O               | TAGTCGG | 1027 | 1028 |
| 284 | CC(C)NS(=O)(=O)C1=CC(=CC=C1)C(O)=O                           | GTGTCAA | 1022 | 1023 |
| 285 | CC(=O)NC1=NC(C(O)=O)=C(Br)C=C1                               | TAGGTCT | 1022 | 1023 |
| 286 | OC(=O)C1=C(ON=C1)C1=CC=CC=C1                                 | GAACTAC | 1019 | 1019 |
| 287 | CC1=NC(C(O)=O)=C(C)O1                                        | CTGTAGT | 1018 | 1018 |
| 288 | O[C@@H]1O[C@@H]([C@@H](O)[C@H](O)[C@H]1O)C(O)=O              | CAATTGG | 1020 | 1020 |
| 289 | NC1=C(Br)C=C(C=N1)C(O)=O                                     | ATACAGT | 1020 | 1021 |
| 290 | OC(=O)C1=CC=C(C=C1)S(=O)(=O)NCC=C                            | AAGCAAT | 1022 | 1022 |
| 291 | OC(=O)CN1NC(=O)C=CC1=O                                       | GCGTGCG | 1113 | 1113 |
| 292 | CN1C=C(C(O)=O)C(=N1)C(F)F                                    | CGGTATG | 1020 | 1021 |
| 293 | COC1=C(NC(C)=O)C=CC(=C1)S(=O)(=O)NC(C1=CNC2=C1C=CC=C2)C(O)=O | TATCGGA | 1030 | 1031 |
| 294 | OC(=O)C1=CCN=C1C1CC1                                         | TGGTAAC | 1018 | 1019 |
| 295 | OC(=O)C1CN(C2CC2)C(=O)C1                                     | GCGGAGA | 1021 | 1022 |
| 296 | OC(=O)C1=C2N=CC(Br)=CN2N=C1                                  | AGCTAAC | 1021 | 1021 |
| 297 | OC(=O)C1=CC2=C(N1)C=C(C=C2)C(F)(F)F                          | TGCCTTC | 1019 | 1019 |
| 298 | OC(=O)C1=CC=C(C=C1)S(=O)(=O)NC1CC1                           | TGCCGGC | 1021 | 1023 |
| 299 | OC(=O)C1CCN(CC1)C(=O)C1=CC=CS1                               | ACTGCTC | 1019 | 1020 |
| 300 | OC(=O)C1=C(Br)C=CC(=C1)S(=O)(=O)NC1CC                        | TCCTATA | 1023 | 1023 |

|     | 1                                                |         |      |      |
|-----|--------------------------------------------------|---------|------|------|
| 301 | COC1=C(C=C(C=C1)C(O)=O)S(=O)(=O)NC1C<br>C1       | CACAACG | 1021 | 1022 |
| 302 | NC(=O)NC1=CC(=CC=C1)C(O)=O                       | CAGTACA | 1018 | 1019 |
| 303 | CC1=NC2=C(C=CC(=C2)C(O)=O)N1C1CC1                | ACCGGAC | 1020 | 1020 |
| 304 | OC(=O)C1=C(N=CC=N1)C1=NC2=C(S1)C=CC<br>=C2       | GCAGATT | 1023 | 1023 |
| 305 | CN1N=C2C=CC=CC2=C1C(O)=O                         | CCACCAC | 1015 | 1015 |
| 306 | OC(=O)C1=C(C=C(C1)C=C1)N1CCCC1=O                 | AGAAGCA | 1023 | 1023 |
| 307 | CC1=NC(=C(S1)C(O)=O)C1=CC=CC=C1                  | TGCGATC | 1020 | 1021 |
| 308 | CC1=CC=C(CN2N=CC3=C2N=C(C)C=C3C(O)<br>=O)C=C1    | AGGCAAC | 1024 | 1023 |
| 309 | OC(=O)C1=CC2=C(N1)C=CC=C2F                       | CATCAGC | 1017 | 1018 |
| 310 | OC(=O)C1=NN(C(=O)NC1=O)C1=CC=CC=C1               | GTTAGAT | 1115 | 1116 |
| 311 | CC(O)C(NS(=O)(=O)C1=CC(C)=C(C)C=C1)C(<br>O)=O    | CTGCAGC | 1022 | 1023 |
| 312 | CC1=C(C=C(C=C1)S(=O)(=O)NC1CC1)C(O)=<br>O        | TCTTCCT | 1019 | 1019 |
| 313 | NC1=C(N=CC=N1)C(O)=O                             | ATCTGGT | 1017 | 1018 |
| 314 | OC(=O)C1=C(C=CC=C1)C1=CC=C(C=C1)C(F)<br>(F)F     | TGAACGG | 1024 | 1025 |
| 315 | OC(=O)C1=C(C1)C=CC(O)=C1                         | CGCCACA | 1016 | 1018 |
| 316 | CC1=NC2=C(C=C(O)C=C2)C(=O)N1CC(O)=O              | TCATAGC | 1020 | 1020 |
| 317 | CC(C)[C@H](N1CC2=C(C=CC=C2)C1=O)C(O)<br>=O       | ACCGATC | 1019 | 1021 |
| 318 | CN(C)CC1=CNC2=C1C=CC(=C2)C(O)=O                  | ACCGTCA | 1019 | 1019 |
| 319 | CN1C2=C(N(CC(O)=O)C=N2)C(=O)N(C)C1=O             | TACTAAG | 1021 | 1022 |
| 320 | CC1=C(C(O)=O)C(=NO1)C1=C(C1)C=CC=C1F             | GCACTAA | 1021 | 1021 |
| 321 | OC(=O)[C@@H]1CC(=O)NC(=O)N1                      | TAGGTGG | 1021 | 1021 |
| 322 | CC1=C(C(=O)C(O)=O)C2=C(N1)C=CC=C2                | ATCAGCT | 1019 | 1019 |
| 323 | CC(C)N1N=CC2=C1N=C(C)C=C2C(O)=O                  | ATTGTAG | 1022 | 1022 |
| 324 | OC(=O)C1=CN=C1C1=CC=C(F)C=C1                     | TCACTCT | 1017 | 1017 |
| 325 | CC1=C(CCC(O)=O)C(=O)NC(=O)N1                     | AACGCTA | 1112 | 1112 |
| 326 | NC(=O)NC(CC(O)=O)C1=CC=CS1                       | TATGGCT | 1021 | 1021 |
| 327 | OC(=O)C1(CCCC1)NC(=O)NCC1=CC=CC=C1               | CCTTGAA | 1021 | 1022 |
| 328 | CC(C)CC(NC(=O)NCC1=CC=C(C)C=C1)C(O)=<br>O        | CTCGCAG | 1022 | 1022 |
| 329 | CC(C)C(NC(=O)NCC1=CC=CC=C1)C(O)=O                | AGAGAAT | 1024 | 1024 |
| 330 | OC(=O)C1=CN=C(C=C1)N1C=NC=N1                     | TCCTACG | 1017 | 1018 |
| 331 | CC1=C(C=NN1C1=NNC(=O)C=C1)C(O)=O                 | AGCTCGC | 1112 | 1113 |
| 332 | CC1=NC2=C(C=NN2C(C)=C1)C(O)=O                    | CAAGCCT | 1018 | 1018 |
| 333 | OC(=O)C1(CC1)C1=CC(C1)=CC=C1                     | ATGTAGC | 1020 | 1022 |
| 334 | CCCN1C(=O)NC(=O)C2=C1N=C(C=C2C(O)=O<br>)C1CC1    | GAAGGCT | 1118 | 1119 |
| 335 | CC(C)CN1C(=O)NC(=O)C2=C1N=C(C=C2C(O)<br>=O)C1CC1 | TCATGAC | 1023 | 1024 |
| 336 | OC(=O)C1=NN(C(=O)C=C1)C1=CC=CC=C1                | TTCTAGC | 1019 | 1021 |
| 337 | OC(=O)C1=CN=N1                                   | AACGTGA | 1110 | 1110 |
| 338 | CC1=C(N=NN1C1=CC=C(F)C=C1)C(O)=O                 | ACAATTA | 1020 | 1020 |
| 339 | OC(=O)C1CCCNC(=O)C1CC1                           | GAATGTC | 1020 | 1020 |
| 340 | CN1NC(=O)C2=C1NC(=O)C(CC(O)=O)=C2C               | CAGAGAT | 1115 | 1116 |
| 341 | OC(=O)CCC1=NNC(=O)NC1=O                          | TCGCCAT | 1110 | 1110 |
| 342 | OC(=O)C1=CC=C(NC(=O)NC2CC2)C=C1                  | GAATGGT | 1023 | 1024 |
| 343 | CC1=C(CC(O)=O)C(=O)NC(N)=N1                      | ATGCCGG | 1113 | 1113 |
| 344 | OC(=O)C1=CC=C(NC1=O)C1=CC=CC=C1                  | CTTGATA | 1113 | 1113 |
| 345 | OC(=O)C1=NNC2=C1CCC2                             | GATCGGC | 1018 | 1020 |
| 346 | OC(=O)C1=NNC2=C1CCCC2                            | GATAAGT | 1021 | 1022 |
| 347 | OC(=O)CCC(NC(=O)NC1=CC=C(F)C=C1)C(O)<br>=O       | ACCACTC | 1113 | 1113 |

|     |                                                           |         |      |      |
|-----|-----------------------------------------------------------|---------|------|------|
| 348 | <chem>CC1=C(C=NC=N1)C(O)=O</chem>                         | GCCAAGA | 1018 | 1018 |
| 349 | <chem>CC(NC(=O)C1=CC=C(Br)S1)C(O)=O</chem>                | CGACTAA | 1022 | 1023 |
| 350 | <chem>OC(=O)C1=CC(NC(=O)NC2CC2)=CC=C1</chem>              | CAACAGG | 1021 | 1022 |
| 351 | <chem>CN1C2=C(NC(CCC(O)=O)=N2)C(=O)NC1=O</chem>           | CGCTCAC | 1111 | 1111 |
| 352 | <chem>OC(=O)C1(CCOC1)C1=CC=C(F)C=C1</chem>                | TGGATAG | 1023 | 1023 |
| 353 | <chem>OC(=O)C1CC1C(=O)N1CCN(CC1)C1=CC=CC=C1</chem>        | ACGGCAT | 1023 | 1024 |
| 354 | <chem>OC(=O)C1=CC(=CC=C1)N1NC(=O)C=CC1=O</chem>           | TGCAAGT | 1115 | 1115 |
| 355 | <chem>NC(=O)C1=CC=C(S1)C(O)=O</chem>                      | AATAATA | 1019 | 1019 |
| 356 | <chem>OC(=O)C1CCCN1C(=O)C1=CC=C(Br)C=C1</chem>            | TGTAGGC | 1025 | 1026 |
| 357 | <chem>OC1CC(N(C1)C(=O)C1=CC=C(F)C=C1)C(O)=O</chem>        | ACTAACA | 1021 | 1022 |
| 358 | <chem>OC(=O)C1=CC=C(C=C1)C(F)F</chem>                     | CATATAC | 1017 | 1017 |
| 359 | <chem>OC(=O)CCN1C=CNC(=O)C1=O</chem>                      | CCTCGGT | 1062 | 1063 |
| 360 | <chem>OC(=O)C1=NNC(=O)C1</chem>                           | GACTCCG | 1060 | 1060 |
| 361 | <chem>OC(=O)CN1C=C2C=CC=CC2=N1</chem>                     | CGCTATC | 1017 | 1017 |
| 362 | <chem>OC(=O)C1=C2C=CC=CN2N=C1</chem>                      | ATCGCGA | 1018 | 1019 |
| 363 | <chem>CC1=NC(=CN1)C(O)=O</chem>                           | CGAGAGC | 1018 | 1018 |
| 364 | <chem>OC(=O)CCC(NC(=O)NC1=CC=C(C=C1)C#N)C(O)=O</chem>     | AAGAGGA | 1120 | 1121 |
| 365 | <chem>OC(=O)CC1(O)CCCC1</chem>                            | CGCAATT | 1017 | 1018 |
| 366 | <chem>OC(=O)C1(CC1)C1=C(F)C=CC=C1</chem>                  | TGGTACG | 1020 | 1022 |
| 367 | <chem>CN1N=C(C(O)=O)C(Br)=C1C</chem>                      | ACGTCGA | 1021 | 1021 |
| 368 | <chem>CC1=C(Br)C=NN1CC(O)=O</chem>                        | CCAAGGT | 1021 | 1021 |
| 369 | <chem>CC1=NC(=NO1)C1=CC(=CC=C1)C(O)=O</chem>              | TTGTGAC | 1020 | 1021 |
| 370 | <chem>OC(=O)CN(CC1=CC=CC=C1)CC1=CC=CC=C1</chem>           | GCGGTGT | 1024 | 1024 |
| 371 | <chem>OC(=O)C1=C(Br)SC=N1</chem>                          | GTACTGG | 1021 | 1022 |
| 372 | <chem>COC1=C(OC)C=C(C=C1)C1(CCCC1)C(O)=O</chem>           | TCGTCTC | 1019 | 1020 |
| 373 | <chem>CC1=CC=C(C)C(CC(O)=O)=C1</chem>                     | TACCACT | 1016 | 1016 |
| 374 | <chem>OC(=O)CC1=CC=C2OCOC2=C1</chem>                      | AGTCTCA | 1018 | 1018 |
| 375 | <chem>CC1=C(CC(O)=O)N=C(O1)C1=CC=CC=C1</chem>             | TGTTGCT | 1020 | 1021 |
| 376 | <chem>OC(=O)CC1=COC2=C1C=CC=C2</chem>                     | TGGCAAT | 1019 | 1020 |
| 377 | <chem>OC(=O)CCC1=NC=C(O1)C1=CC=CC=C1</chem>               | CGCTCCG | 1018 | 1020 |
| 378 | <chem>OC(=O)CCC1=NC=C(O1)C1=CC=C(Cl)C=C1</chem>           | AAGGTTG | 1024 | 1025 |
| 379 | <chem>CC1=C(OCC(O)=O)C=CC(Cl)=C1</chem>                   | GCTACAT | 1019 | 1019 |
| 380 | <chem>OC(=O)CCC1=CC=C(O1)C1=CC=CS1</chem>                 | TGTCTTA | 1020 | 1022 |
| 381 | <chem>COC1=CC2=C(C=C1)C(CC(O)=O)=CO2</chem>               | CACGAAT | 1019 | 1020 |
| 382 | <chem>CC1=C(CC(O)=O)C2=CC(C)=CC(C)=C2N1</chem>            | GCGATGC | 1021 | 1023 |
| 383 | <chem>CC1=NNC(C(O)=O)=C1Br</chem>                         | CGCTGCT | 1019 | 1020 |
| 384 | <chem>OC(=O)C1=C(Br)C(=NN1)C1CC1</chem>                   | CAGTGAG | 1067 | 1068 |
| 385 | <chem>[NH]C(OCC1=C([N+])([O-])=O)C=C(OC)C(OC)=C1=O</chem> | ACCGCGT | 1011 | 1012 |
| 386 | <chem>[NH2]</chem>                                        | ATATCCA | 1010 | 1011 |

Supplementary Table 2 | Structures and codons of the 2<sup>nd</sup> diversity elements with predicted mass and found mass of the corresponding conjugates at 24 charge state ions.

(g) Conjugation of 185 carboxylic acids and 136 alkynes as third diversity elements (DE-3), encoding by enzymatic polymerization, assembling of the 3<sup>rd</sup> Pool, purification and characterization.

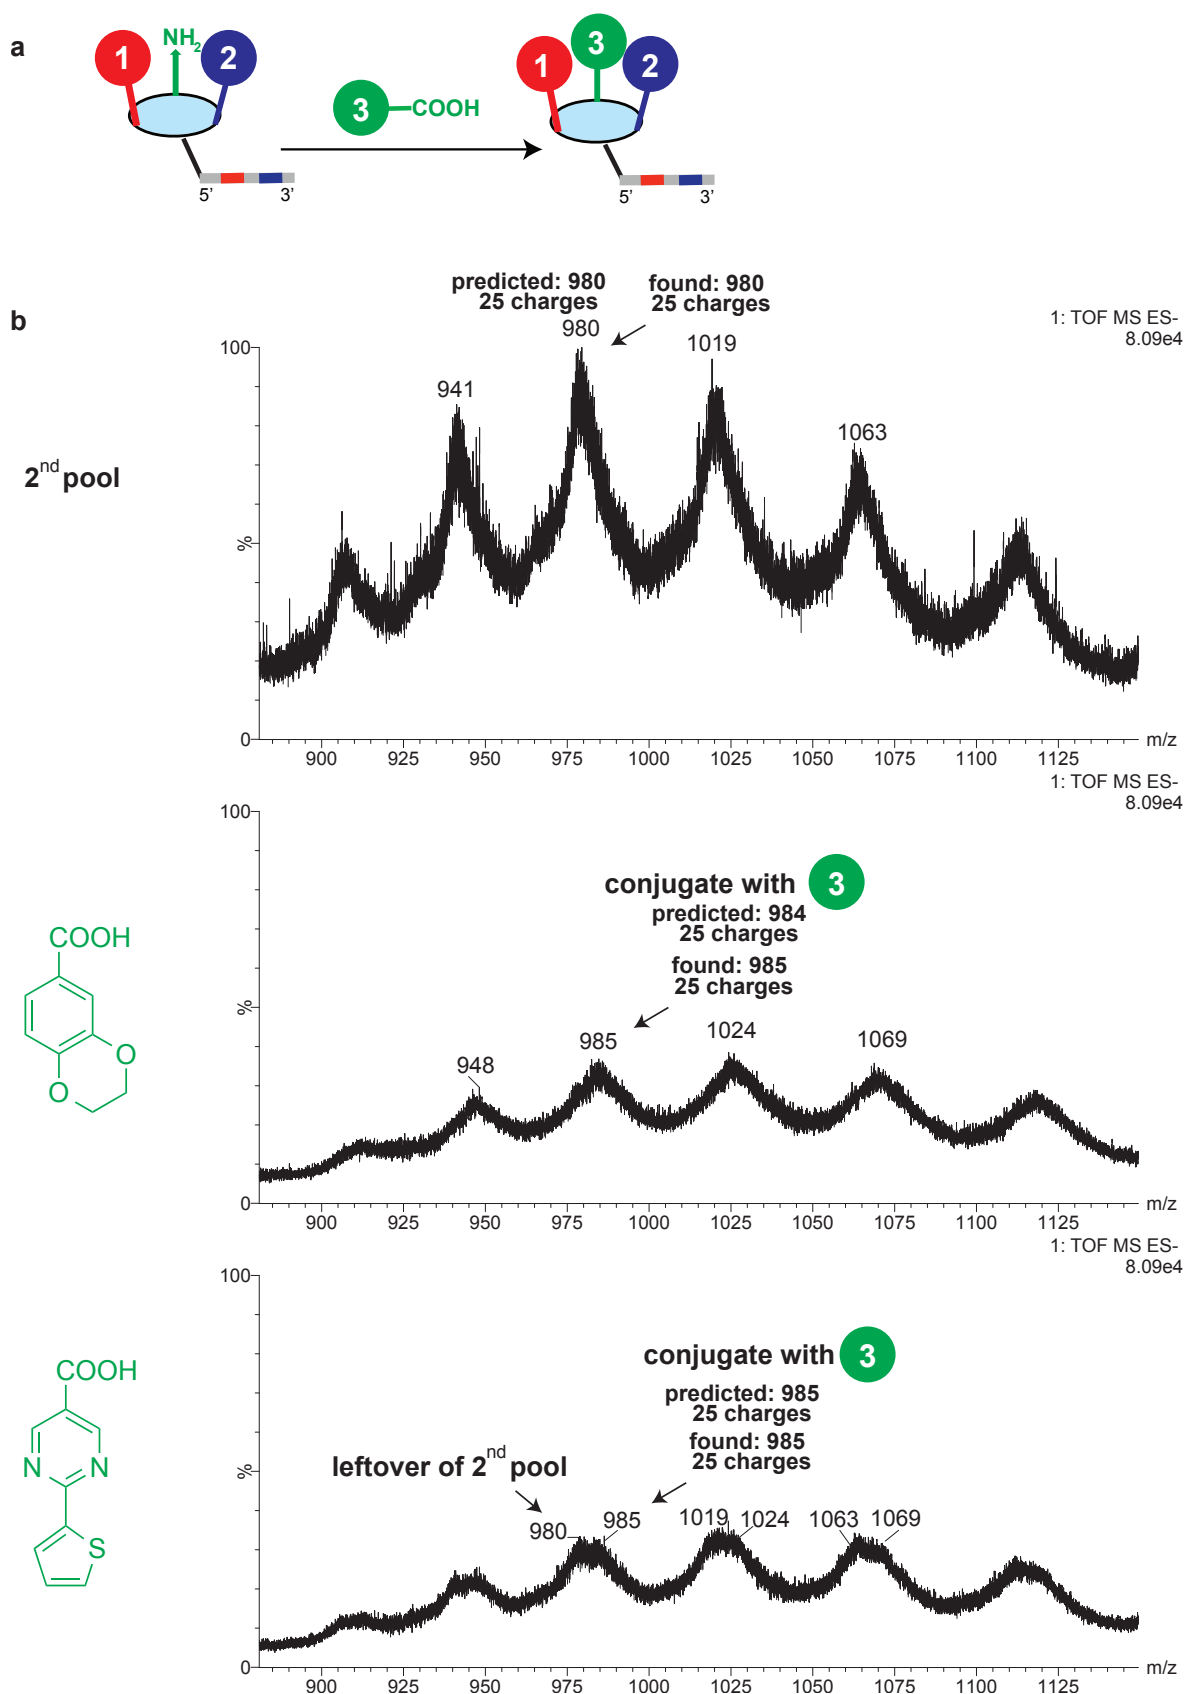

**Supplementary Figure 12 | Conjugation of the 3<sup>rd</sup> diversity elements. a,** Conjugation of 3<sup>rd</sup> diversity elements to the 2<sup>nd</sup> pool. **b,** representative MS spectra of 2<sup>nd</sup> pool, conjugates from 2<sup>nd</sup> pool + 2,3-dihydrobenzo[*b*][1,4]dioxine-6-carboxylic acid and conjugates from 2<sup>nd</sup> pool + 2-(thiophen-2-yl)pyrimidine-5-carboxylic acid, 50 pmol used for injection. MS analyses were performed on Xevo G2-XS Q-TOF

with electrospray ionization source. For 2,3-dihydrobenzo[*b*][1,4]dioxine-6-carboxylic acid as diversity element, the conversion was over 80 % according to the peak intensity ratio between the conjugates and the starting pool. For 2-(thiophen-2-yl)pyrimidine-5-carboxylic acid as diversity element, the conversion was about 50 % according to the peak intensity ratio between the conjugates and the starting pool.

A part of the 2<sup>nd</sup> pool (100 nmol) was divided into 136 (0.7 nmol each) aliquots. These aliquots (0.7 nmol each) were immobilized on DEAE sepharose (50  $\mu$ L of slurry, GE Healthcare, Catalog: 17-0709-01). The resin was washed with aq AcOH (3  $\times$  0.5 mL, 10 mM), H<sub>2</sub>O (3  $\times$  0.5 mL) and DMSO: H<sub>2</sub>O: *t*BuOH = 4 : 3 : 1 (3  $\times$  0.5 mL). To the resin-immobilized DNA-conjugate was added to a solution of the corresponding alkyne diversity element (20 mM), TBTA (10 mM, Aldrich, Catalog: 678937), CuSO<sub>4</sub> (2.5 mM, Aldrich, Catalog: 451657) and ascorbate (10 mM, Aldrich, Catalog: 41996) in DMSO: H<sub>2</sub>O: *t*BuOH = 4 : 3 : 1 (0.2 mL). The slurry was agitated at 25  $^{\circ}$ C for 4 h. The reaction solution was removed and the resin washed with DMSO: H<sub>2</sub>O: *t*BuOH = 4 : 3 : 1 (6  $\times$  0.5 mL), aq EDTA (3  $\times$  0.5 mL, 50 mM, FisherBio, Catalog: BP2482-500) and aq AcOH (3  $\times$  0.5 mL, 10 mM). The DNA was eluted from the resin by incubation with aq AcOH (3  $\times$  0.2 mL, 3 M) for 30 min each time. The DNA-conjugates were isolated by ethanol precipitation and the pellets redissolved in deionized water (100  $\mu$ L), the recovery of conjugates quantified by UV absorption at 260 nm, resulting recovery yields were around 80 - 90 %. A part of the 2<sup>nd</sup> pool (152 nmol) was dissolved by Tris-HCl (10 mL, 500 mM, pH 8.0), followed with addition of TECP-HCl (350 mg). The Staudinger reduction lasted for 12 h at 25  $^{\circ}$ C, reduction products were isolated by ethanol precipitation and the pellets redissolved in deionized water (5 mL). The reduction products were further divided into 185 (0.7 nmol each) aliquots conjugated with 185 carboxylic acids using the same condition as described above. The DNA-conjugates were isolated by ethanol precipitation and the pellets redissolved in deionized water (200  $\mu$ L), quantified the recovery conjugates by UV absorption at 260 nm and recovery yields were around 40-60 %. All the 324 conjugates were characterized by UPLC-MS and conversion yields were all over 80 % based on the MS peak intensities of the starting pool (2<sup>nd</sup> pool here) and the conjugates from 3<sup>rd</sup> diversity elements (see Supplementary Fig. 12).

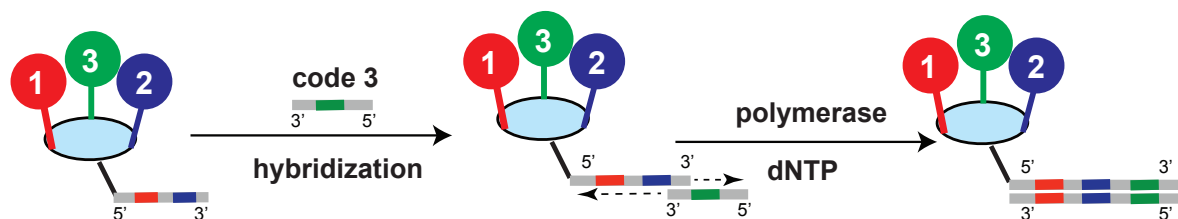

**Supplementary Figure 13 | Encoding of the 3<sup>rd</sup> diversity elements and purification.**

Individual conjugates with the third diversity elements were subjected to polymerase extension without further purification. To these conjugates (250 pmol), oligos (code 3: 5'-OH-GCTCTGCACGGTCGCNNNNNNNGCTGCCTGACGC -3'-OH, 300 pmol, 1.2 equiv.) were added, followed with addition of NEB Buffer 2 (40  $\mu$ L, New England BioLabs, Catalog: B7002S) and kept at 50  $^{\circ}$ C for 10 minutes. After the system cooled down to 22  $^{\circ}$ C, a solution of 2'-deoxynucleotide triphosphates (330  $\mu$ M, 40  $\mu$ L, Catalog: N0446S) and Klenow Fragment 3'  $\rightarrow$  5' *exo*- (2  $\mu$ L, 10 units, New England BioLabs, Catalog: M0212S) was added. The polymerase extension reaction was allowed to proceed at 22  $^{\circ}$ C for 1 hour (see Supplementary Fig. 13). The conversion yields were all over 80% based on the UV integral of absorption at 260 nm by UPLC and denaturing PAGE analysis. 185 carboxylic acids and 136 alkynes and 324 DNA tags were employed as third diversity elements and corresponding barcodes, respectively (Two extra tags were used to encode "N<sub>3</sub>-on" and another tag was used to encode "N<sub>3</sub>-off" [NH<sub>2</sub>]). Equimolar amounts (250 pmol) of the 324 conjugates obtained as described above were combined to generate the 3<sup>rd</sup> pool as the final **ETH-YL** library with 35 million members. The analysis results after polymerase extension reaction with code 3 are listed as follows:

| Number | Smiles                                                                  | Codon    | Predicted (Da) | Found (Da) |
|--------|-------------------------------------------------------------------------|----------|----------------|------------|
| 1      | <chem>Cl.CN(CC#C)CC1=CC=CC=C1</chem>                                    | GAGGTCTG | 1026           | 1024       |
| 2      | <chem>CN1C=NC=C1C#C</chem>                                              | TTCGCCG  | 1024           | 1025       |
| 3      | <chem>CC(O)(C=C)C#C</chem>                                              | GGATATA  | 1024           | 1024       |
| 4      | <chem>NC1=CC(=CC=C1)C#C</chem>                                          | ACCTAGG  | 1024           | 1026       |
| 5      | <chem>OC(C#C)(C1=CC=CC=C1)C(F)(F)F</chem>                               | TGTATGA  | 1028           | 1029       |
| 6      | <chem>CCN(CC)CC#C</chem>                                                | GTAAACG  | 1024           | 1026       |
| 7      | <chem>C#CC1=CSC=C1</chem>                                               | ACTGTTC  | 1024           | 1024       |
| 8      | <chem>C#CC1=CC=CN=C1</chem>                                             | TACATAA  | 1024           | 1023       |
| 9      | <chem>FC(F)(F)C1=C(C=CC=C1)C#C</chem>                                   | ATGCGCC  | 1027           | 1027       |
| 10     | <chem>CN(C)C1=CC=C(C=C1)C#C</chem>                                      | CAACCAC  | 1026           | 1025       |
| 11     | <chem>OC(=O)C1=CC=CC(=C1)C#C</chem>                                     | TCGCGGT  | 1119           | 1118       |
| 12     | <chem>OC(C#C)(C1=CC=CC=C1)C1=CC=CC=C1</chem>                            | ATGGCAC  | 1028           | 1029       |
| 13     | <chem>NC(CC#C)C(O)=O</chem>                                             | CGCGAAG  | 1118           | 1119       |
| 14     | <chem>NC1=CC=C(C=C1)C#C</chem>                                          | ACAGCAT  | 1024           | 1025       |
| 15     | <chem>C#CC1=NC=CC=C1</chem>                                             | TGGTTAG  | 1024           | 1024       |
| 16     | <chem>NC1=CC=CC=C1C#C</chem>                                            | GACAGGT  | 1024           | 1026       |
| 17     | <chem>NS(=O)(=O)C1=NN=C(NC(=O)CCCC#C)S1</chem>                          | GGTAACT  | 1076           | 1076       |
| 18     | <chem>C#CC1=CCCCC1</chem>                                               | CGGATTA  | 1024           | 1025       |
| 19     | <chem>C[C@]12CC[C@H]3[C@@H](CCc4cc(O)ccc34)[C@@H]1CC[C@@]2(O)C#C</chem> | GCCAAGA  | 1032           | 1032       |
| 20     | <chem>C1C1=CC=CC(C1)=C1C#C</chem>                                       | CAATGGC  | 1027           | 1026       |
| 21     | <chem>CC1=CC=C(NC(=O)NCC#C)C=C1</chem>                                  | GTTCCGT  | 1027           | 1027       |
| 22     | <chem>OC(=O)C1=CC(=CN=C1)C#C</chem>                                     | TCGCCAC  | 1172           | 1174       |
| 23     | <chem>O=C1N(CC#C)C2=C(C=CC=C2)C1=O</chem>                               | CACAACA  | 1027           | 1026       |
| 24     | <chem>CCC(C)(O)C#C</chem>                                               | CGCGCCT  | 1024           | 1023       |
| 25     | <chem>C#CC1=CC=NN1</chem>                                               | GAGTAGT  | 1023           | 1024       |

|    |                                                      |          |      |      |
|----|------------------------------------------------------|----------|------|------|
| 26 | <chem>BrC1=NC=C(OCC#C)C=C1</chem>                    | ACATCGG  | 1028 | 1027 |
| 27 | <chem>CNC1=CC=C(OCC#C)C=C1</chem>                    | TCTCGTA  | 1026 | 1025 |
| 28 | <chem>BrC1=CC2=C(C=C1)N(CC#C)C(=O)C2=O</chem>        | CTACAAT  | 1031 | 1031 |
| 29 | <chem>CN1C=C(C=N1)C#C</chem>                         | CTCCGAA  | 1024 | 1023 |
| 30 | <chem>COC1=C(Br)C=C(C=C1)C#C</chem>                  | TAGTCCT  | 1028 | 1029 |
| 31 | <chem>CC(NCC#C)C1=CC2=C(OCC(=O)N2)C=C1</chem>        | GGTTGGC  | 1029 | 1030 |
| 32 | <chem>C1C1=C(C=CC=C1)C#C</chem>                      | ACTACAG  | 1025 | 1026 |
| 33 | <chem>NC(=O)C1=CC(=CN=C1)C#C</chem>                  | TCACAAT  | 1026 | 1027 |
| 34 | <chem>COC1=C(F)C=C(C=C1)C#C</chem>                   | GAGCAAG  | 1026 | 1025 |
| 35 | <chem>O=C(NCC#C)NC1CC1</chem>                        | TGGCGCT  | 1025 | 1026 |
| 36 | <chem>C#CC1=CC(=CC=C1)C1=CC=CC=C1</chem>             | CTGAGCC  | 1027 | 1028 |
| 37 | <chem>COC1=CC(C#C)=C(Cl)C=C1</chem>                  | GCCTCGT  | 1027 | 1028 |
| 38 | <chem>Cl.NCCC(O)CCC#C</chem>                         | TGTTACG  | 1025 | 1025 |
| 39 | <chem>C#CCN1C2=C(C=CC=C2)C2=C1C=CC=C2</chem>         | TAATTTCG | 1028 | 1030 |
| 40 | <chem>OC1=CC(OCC#C)=CC=C1</chem>                     | ATGTAAC  | 1026 | 1026 |
| 41 | <chem>FC1=CC(=CC(F)=C1)C#C</chem>                    | TGTTCCA  | 1025 | 1026 |
| 42 | <chem>C#CCN1C=NC=N1</chem>                           | CCATCTT  | 1024 | 1025 |
| 43 | <chem>NC(=O)NC1=CC(=CC=C1)C#C</chem>                 | GCGCATT  | 1026 | 1027 |
| 44 | <chem>C#CCN1C=CC2=C1C=CC=C2</chem>                   | TTACTCC  | 1026 | 1028 |
| 45 | <chem>CC1=CC(NC(=O)NCC#C)=CC=C1</chem>               | CTGCTTC  | 1027 | 1028 |
| 46 | <chem>COC1=C(C=C(Cl)C=C1)C#C</chem>                  | CGTGAGC  | 1027 | 1026 |
| 47 | <chem>FC(F)(F)C1=NC(OCC#C)=CC=C1</chem>              | GGTCCAC  | 1028 | 1028 |
| 48 | <chem>O=C1NC(CC#C)C(=O)N1</chem>                     | TCCACAG  | 1119 | 1120 |
| 49 | <chem>CCN1C=C(C=N1)C#C</chem>                        | GATGAAT  | 1025 | 1024 |
| 50 | <chem>FC(F)OC1=C(C=CC=C1)C#C</chem>                  | GTCCGGT  | 1027 | 1028 |
| 51 | <chem>CC1=NC(=CC=C1)C#C</chem>                       | CGAGATA  | 1024 | 1024 |
| 52 | <chem>CC(O)CC#C</chem>                               | TAGCCAA  | 1023 | 1024 |
| 53 | <chem>Cl.NC(=N)NCC#C</chem>                          | TTCGTTA  | 1024 | 1024 |
| 54 | <chem>Cl.C#CCN1C=CN=C1C1=CC=CS1</chem>               | AAGTTAA  | 1027 | 1027 |
| 55 | <chem>OC(=O)CC(=O)NCC#C</chem>                       | ACGAAGC  | 1172 | 1173 |
| 56 | <chem>OC(=O)[C@@H]1CCCN1CC#C</chem>                  | TAAGCTG  | 1119 | 1120 |
| 57 | <chem>BrC1=CC2=C(OCC(=O)N2CC#C)C=C1</chem>           | TTGTCAT  | 1031 | 1031 |
| 58 | <chem>BrC1=C(OCC#C)C=CC=N1</chem>                    | CGCCACA  | 1028 | 1027 |
| 59 | <chem>O=C1CCCCN1CC#C</chem>                          | TCGTCCG  | 1025 | 1027 |
| 60 | <chem>C#CC1=C2CCCCC2=CC=C1</chem>                    | ATATATA  | 1026 | 1027 |
| 61 | <chem>C#CC1=NC2=C(C=CC=C2)N=C1</chem>                | ACGGCGG  | 1026 | 1026 |
| 62 | <chem>NC(=S)NC1=CC(=CC=C1)C#C</chem>                 | GGCTGAT  | 1027 | 1024 |
| 63 | <chem>C#CCNC1CCCC1</chem>                            | CTAATGA  | 1025 | 1027 |
| 64 | <chem>CN(CC#C)C1=NC=C(N)N=C1</chem>                  | CGGATGC  | 1026 | 1027 |
| 65 | <chem>OC(=O)C1=CC(=CC=C1)S(=O)(=O)NCC#C</chem>       | GTCAGAT  | 1236 | 1237 |
| 66 | <chem>C#CC1=CN=CN=C1</chem>                          | GGCGACC  | 1024 | 1026 |
| 67 | <chem>OC(=O)C1(CC#C)CCC1</chem>                      | CCAGCTC  | 1025 | 1024 |
| 68 | <chem>O=C1NCCN1CC#C</chem>                           | AGGCGGC  | 1025 | 1025 |
| 69 | <chem>COC1=NC(=CC=C1)C#C</chem>                      | AGCATA   | 1025 | 1025 |
| 70 | <chem>CC1=NC(=CS1)C#C</chem>                         | ACAATCG  | 1025 | 1026 |
| 71 | <chem>C#CCN1C=CN=C1</chem>                           | AATGTAC  | 1024 | 1024 |
| 72 | <chem>C1C1=CC2=C(C=C1)N(CC(=O)NCC#C)C(=O)C2=O</chem> | GGTTGAA  | 1031 | 1031 |
| 73 | <chem>O=C(NCC#C)C1=CNC(=O)C=C1</chem>                | GATAATT  | 1027 | 1027 |
| 74 | <chem>NC1=C(C=CC=C1)C(=O)NCC#C</chem>                | TAGACAT  | 1027 | 1026 |



|     |                                                                   |         |      |      |
|-----|-------------------------------------------------------------------|---------|------|------|
| 75  | C#CC1=CC=NC=C1                                                    | CCTCCGC | 1024 | 1026 |
| 76  | NC1=C(F)C(F)=C(C#C)C(F)=C1F                                       | GCAGTAC | 1027 | 1028 |
| 77  | CC1=NC2=C(C=C1)C=C(C=C2)C#C                                       | ATGTTCC | 1027 | 1027 |
| 78  | Cl.NC(CC#C)C(N)=O                                                 | GCATAGG | 1024 | 1025 |
| 79  | FC1=C(C=CC(Br)=C1)C(=O)C#C                                        | GGCCTCT | 1029 | 1028 |
| 80  | CC[C@]12CC[C@H]3[C@@H](CCC4=CC(=O)CC[C@H]34)[C@@H]1CC[C@@]2(O)C#C | CTGAACA | 1033 | 1032 |
| 81  | CS(=O)(=O)NCCC#C                                                  | TATTATA | 1026 | 1026 |
| 82  | CC(O)(C#C)C1=C(Br)C=CC=C1                                         | GTATGAC | 1029 | 1030 |
| 83  | CC(=O)C(CC#C)C(C)=O                                               | ATTCTCC | 1025 | 1025 |
| 84  | CNC(=O)C#C                                                        | TAACCGG | 1023 | 1024 |
| 85  | C#CC1=CN=CS1                                                      | ATAGCTG | 1024 | 1026 |
| 86  | C#CC1=NC=NC=C1                                                    | TCAGTTG | 1024 | 1024 |
| 87  | C1C1=C(C1)C(=CC=C1)C#C                                            | GCGTAAT | 1027 | 1028 |
| 88  | OC(CC1=CC=CC=C1)C#C                                               | GGTGCAT | 1026 | 1027 |
| 89  | COCC(N)C#C                                                        | ACCGGCC | 1024 | 1023 |
| 90  | NC(C#C)C1=CC=C(Br)C=C1                                            | GCTAAGG | 1028 | 1027 |
| 91  | C#CC1=NC=CS1                                                      | ACACTAT | 1024 | 1024 |
| 92  | CC(C)(NS(C)(=O)=O)C#C                                             | AGGTGTC | 1026 | 1026 |
| 93  | OC(CC#C)C1CC1                                                     | TGCTTAC | 1024 | 1024 |
| 94  | Cl.C#CCNCC1CC1                                                    | CCGGTAG | 1024 | 1023 |
| 95  | COCCN(C)CC#C                                                      | GAGGCAA | 1025 | 1025 |
| 96  | C1C1=CC(=CC(C1)=C1)C#C                                            | AGGATAA | 1027 | 1027 |
| 97  | C#CC1=NC2=C(S1)C=CC=C2                                            | CTCACCT | 1026 | 1028 |
| 98  | NC(CO)CC#C                                                        | TAGCTTA | 1024 | 1025 |
| 99  | CC1=C(OCC#C)C=CC=C1                                               | CTAGCAC | 1026 | 1026 |
| 100 | C1C1=C(NC(=O)NCC#C)C=CC=C1                                        | AACGTCG | 1028 | 1027 |
| 101 | FC1=C(F)C=C(NC(=O)NCC#C)C=C1                                      | CACGGAC | 1028 | 1028 |
| 102 | OC(=O)C1=CC=C(C=C1)S(=O)(=O)NCC#C                                 | GAATCTG | 1236 | 1236 |
| 103 | CC1=CC(NC(=O)NCC#C)=NO1                                           | CCGGACT | 1027 | 1027 |
| 104 | O=S(=O)(NCC#C)C1=CC=CC=C1                                         | TTGGATG | 1028 | 1030 |
| 105 | O=C(NCC#C)NC1=CC=CC=C1                                            | TACGAAG | 1027 | 1026 |
| 106 | BrC1=CC2=C(OCCC2NCC#C)C=C1                                        | TCCTATT | 1031 | 1031 |
| 107 | OC(=O)C1(CCC2=C1C=CC=C2)NC(=O)NCC#C                               | AAGTGGC | 1124 | 1124 |
| 108 | C1C1=CC=C(NC(=O)NCC#C)C=C1                                        | ATCAATG | 1028 | 1028 |
| 109 | COC1=CC(=NC=C1)C#C                                                | GATAACC | 1025 | 1025 |
| 110 | FC1=C(NC(=O)NCC#C)C=CC=C1                                         | AGCTAAT | 1028 | 1030 |
| 111 | NC(C#C)C1CCCC1                                                    | ATACAGC | 1025 | 1026 |
| 112 | CC1=CC(NC(=O)CNCC#C)=CC=C1                                        | TCAGGAA | 1028 | 1027 |
| 113 | FC1=C(C=CN=C1)C#C                                                 | TAGCTAC | 1025 | 1024 |
| 114 | CC(=O)O[C@]1(CCC2C3CCC4=CC(=O)CC[C@@H]4C3CC[C@@]12C)C#C           | ACAACTC | 1034 | 1034 |
| 115 | Cl.C#CCN1C=NC2=C1C=CC=C2                                          | CACATTC | 1026 | 1027 |
| 116 | OC(=O)CCCC#C                                                      | GATCATC | 1171 | 1119 |
| 117 | BrC1=CC=C(C=C1)C#C                                                | TACGGAT | 1027 | 1027 |
| 118 | C#CC1=C2C=CC3=CC=CC4=CC=C(C=C1)C2=C34                             | TGTGGTG | 1029 | 1029 |
| 119 | NCC#C                                                             | ACCAGGC | 1022 | 1023 |
| 120 | OCCCC#C                                                           | GACCACA | 1023 | 1023 |
| 121 | COC1=CC=C(C#C)C(C)=C1                                             | CATGACG | 1026 | 1025 |
| 122 | C#CC1=CC=C2N=CC=NC2=C1                                            | GGTGCCG | 1026 | 1026 |

|     |                                                  |          |      |      |
|-----|--------------------------------------------------|----------|------|------|
| 123 | NCCOCC#C                                         | CTTAGGA  | 1024 | 1024 |
| 124 | OC1(CCCCC1)C#C                                   | TGGCATA  | 1025 | 1024 |
| 125 | NC1=CC=CC=C1NC(=O)C1=CC=CC(=C1)C#C               | TAATGAC  | 1029 | 1030 |
| 126 | C#CC1=CC=CC=C1                                   | TGGTCAC  | 1024 | 1023 |
| 127 | C#CC1=CC=C(C=C1)C1=CC=CC=C1                      | CCTGGCC  | 1027 | 1028 |
| 128 | FC(F)(F)C1=CC(=CC(=C1)C#C)C(F)(F)F               | TACTCGG  | 1030 | 1031 |
| 129 | CC(C)(C)C1=NN(C(=O)O1)C1=C(C1)C=C(C1)C(OCC#C)=C1 | GTTGAGA  | 1034 | 1035 |
| 130 | OC1(C#C)C2=C(C=CC=C2)C2=C1C=CC=C2                | CGCTAGC  | 1028 | 1029 |
| 131 | CC1(C)OC2=C(C=CC=C2)C2OC(C)(CCC12)C#C            | TACGGTC  | 1030 | 1031 |
| 132 | CC1(C)CC(O)(CC(C)(C)N1)C#C                       | GCCGGAG  | 1027 | 1026 |
| 133 | O=C1NC=C(C#C)C(=O)N1                             | GGTCGTG  | 1119 | 1118 |
| 134 | CC1=C(C)C2=C(N)N=C(SCC#C)N=C2S1                  | CTTACCG  | 1030 | 1030 |
| 135 | C#CC1=C2C=CNC2=NC=N1                             | GCACAGC  | 1026 | 1026 |
| 136 | NCCC(=O)N1CC2=C(C=CC=C2)C#CC2=C1C=CC=C2          | GCGAATG  | 1031 | 1032 |
| 137 | CC(C)CC(O)=O                                     | AAGCGCT  | 1023 | 1022 |
| 138 | OC(=O)CC1CCCC1                                   | CAGCGTC  | 1024 | 1023 |
| 139 | OC(=O)CC1CCCCC1                                  | ATACTGT  | 1024 | 1025 |
| 140 | CN(C)CC(O)=O                                     | CAGAATA  | 1023 | 1022 |
| 141 | OCC(O)=O                                         | ATGCATT  | 1022 | 1022 |
| 142 | OC(=O)C[C@@H]1C[C@H]2CC[C@@H]1C2                 | GGCGTAG  | 1025 | 1026 |
| 143 | CC1(C)[C@@H]2CC[C@@]1(C)[C@H](CC(O)=O)[C@H]2O    | CGCGTAC  | 1027 | 1028 |
| 144 | COC1=CC(OC)=C(CCC(O)=O)C=C1                      | ATCGGTA  | 1027 | 1026 |
| 145 | OC(=O)CCCC1=CC=C(I)C=C1                          | GTCTAAT  | 1031 | 1029 |
| 146 | OC(=O)C[C@]12CC3CC(C[C@@](O)(C3)C1)C2            | ATGACGA  | 1027 | 1030 |
| 147 | COC1=CC=C(Br)C=C1CC(O)=O                         | CGCACGC  | 1029 | 1027 |
| 148 | OC(=O)CC1NC(=O)NC1=O                             | AGTCTGG  | 1025 | 1025 |
| 149 | OC(=O)CCN1C(=O)OC2=C1C=CC=C2                     | ACGCATC  | 1028 | 1028 |
| 150 | NS(=O)(=O)C1=CC=C(NC(=O)CCC(O)=O)C=C1            | TCGTGTG  | 1030 | 1030 |
| 151 | COC1=CC=C(CC(O)=O)C=C1O                          | GGATGGA  | 1026 | 1028 |
| 152 | NS(=O)(=O)C1=CC=C(NC(=O)SCC(O)=O)C=C1            | GTTATCA  | 1031 | 1030 |
| 153 | CN(CC(O)=O)S(=O)(=O)C1=CC=CC=C1                  | GTGTCCT  | 1028 | 1027 |
| 154 | NC(=O)NCCC(O)=O                                  | TCCGAGC  | 1024 | 1024 |
| 155 | OC(=O)CC1OC2=C(NC1=O)C=CC=C2                     | GCAGACG  | 1121 | 119  |
| 156 | CC1=C(CC(O)=O)NC2=C1C=CC=C2                      | ATCTTGA  | 1026 | 1025 |
| 157 | OC(=O)CCC1=NN=C(O1)C1=CC=CC=C1                   | GTCGTAA  | 1028 | 1027 |
| 158 | OC(=O)CCN1C(=O)COC2=C1C=CC=C2                    | ACTGTCA  | 1028 | 1027 |
| 159 | OC(=O)CC(C1=CC=CO1)C1=CC=CC=C1                   | GAAGTCT  | 1028 | 1027 |
| 160 | CC1=NC2=C(C=CC=C2)N1CCC(O)=O                     | AGCTGTA  | 1027 | 1028 |
| 161 | COC1=C(C=CC=C1)C1=NOC(CCC(O)=O)=N1               | CTGACTC  | 1029 | 1027 |
| 162 | OC(=O)CCC1=NC(=NO1)C1=CC=CO1                     | GGCAGAC  | 1027 | 1028 |
| 163 | OC(=O)CC1=COC2=C1C=CC=C2                         | AGTGATT  | 1028 | 1027 |
| 164 | CC1=CC=C2N=C(C)C=C(C(O)=O)C2=C1                  | ATATTCTG | 1027 | 1027 |
| 165 | OC(=O)C1=CC=C2N=CC=CC2=C1                        | GCTGGTG  | 1026 | 1025 |
| 166 | OC(=O)C1=CN(C2CC2)C2=CC(C1)=C(F)C=C2C1=O         | CCACTCT  | 1030 | 1029 |
| 167 | OC(=O)C1=C2C=CN=CC2=CC=C1                        | CTGGCGG  | 1026 | 1023 |
| 168 | OC(=O)C1=CC=C2NC=CC2=C1                          | TTGTGAC  | 1025 | 1026 |
| 169 | COC1=CC=C2NC(=CC2=C1)C(O)=O                      | ACGGTAA  | 1026 | 1026 |
| 170 | CN1C=CC2=CC(=CC=C12)C(O)=O                       | GCGTGCA  | 1026 | 1026 |

|     |                                                       |         |      |      |
|-----|-------------------------------------------------------|---------|------|------|
| 171 | <chem>OC(=O)C1=CC2=CC=CC=C2N1</chem>                  | CTCTAGT | 1025 | 1024 |
| 172 | <chem>OC(=O)C1=CC=C2NC=NC2=C1</chem>                  | TCGAACG | 1025 | 1022 |
| 173 | <chem>OC(=O)C1=CC=C2OCCOC2=C1</chem>                  | GACGGCA | 1026 | 1024 |
| 174 | <chem>OC(=O)C1=NC2=C(C=CC=C2)N=C1</chem>              | TCTAAGC | 1026 | 1024 |
| 175 | <chem>OC(=O)C1=CC2=C(C=C1)N=CC=N2</chem>              | GGAAGTC | 1026 | 1026 |
| 176 | <chem>OC(=O)C1=CN=C(N=C1)C1=CC=CS1</chem>             | GCCAATC | 1027 | 1026 |
| 177 | <chem>OC(=O)C1=NNC(=C1)C1CC1</chem>                   | CAACTCC | 1025 | 1024 |
| 178 | <chem>OC(=O)C1=CN2C=CSC2=N1</chem>                    | GTAAGCC | 1026 | 1025 |
| 179 | <chem>COC1=CC(=CC(OC)=C1)C(=O)N1CCC(CC1)C(O)=O</chem> | ACAAGTG | 1031 | 1030 |
| 180 | <chem>CC(C)C1=CC(=NO1)C(O)=O</chem>                   | GTATAAG | 1025 | 1027 |
| 181 | <chem>OC(=O)C12CC3CC(CC(C3)(C1)N1C=NC=N1)C2</chem>    | AGTGGCG | 1029 | 1027 |
| 182 | <chem>CC1=CC=C(C=C1)N(CC(O)=O)S(C)(=O)=O</chem>       | CGAGGAT | 1029 | 1028 |
| 183 | <chem>OC(=O)C1C2CC(C=C2)C1C(=O)NC1CC1</chem>          | GGTACGC | 1028 | 1025 |
| 184 | <chem>OC(=O)C1=CN=C(N=C1)C1=CC=CN=C1</chem>           | ATGGTTC | 1027 | 1028 |
| 185 | <chem>OC(=O)[C@@H]1C[C@H]1C1=CC=CC=C1</chem>          | CGAAGCC | 1025 | 1025 |
| 186 | <chem>OC(=O)C1COC2=CC=CC=C2O1</chem>                  | GAGGATC | 1026 | 1020 |
| 187 | <chem>CC1(C)C2CCC1(C(O)=O)C(=O)C2</chem>              | ATCTCCA | 1026 | 1026 |
| 188 | <chem>CN1[C@@H]([C@H](CC1=O)C(O)=O)C1=CN=CC=C1</chem> | CGATCAT | 1028 | 1028 |
| 189 | <chem>CC(C)[C@H]1CC[C@@H](CC1)C(O)=O</chem>           | CTGCGAG | 1026 | 1025 |
| 190 | <chem>OC(=O)[C@@H]1CCC(=O)N1</chem>                   | CATAGGT | 1024 | 1025 |
| 191 | <chem>O[C@@H]1CC(=C[C@@H](O)[C@H]1O)C(O)=O</chem>     | TGAATTG | 1026 | 1026 |
| 192 | <chem>OCC(C(O)=O)C1=CC=CC=C1</chem>                   | TAGTTGT | 1025 | 1025 |
| 193 | <chem>CC(=O)N1C[C@H](O)C[C@H]1C(O)=O</chem>           | AGTCCAT | 1026 | 1026 |
| 194 | <chem>COC1=CC=CC(=C1)N1C=C(C=N1)C(O)=O</chem>         | GCGGTAT | 1028 | 1029 |
| 195 | <chem>OC(=O)C1CN(CC2=CN=CC=C2)C(=O)C1</chem>          | GACGCTG | 1028 | 1027 |
| 196 | <chem>OC(=O)C1CN(C2CCCC2)C(=O)C1</chem>               | AACACCA | 1027 | 1026 |
| 197 | <chem>CC(=O)C1=C(C)N(CC(O)=O)N=C1C</chem>             | AGAGACG | 1027 | 1027 |
| 198 | <chem>CC(C)C1=NC(C)=C(S1)C(O)=O</chem>                | TCTCTAG | 1026 | 1026 |
| 199 | <chem>OC(=O)C1CCN(CC1)C(=O)C1CCCC1</chem>             | TTACGTA | 1028 | 1026 |
| 200 | <chem>OC(=O)C1=CC=CC=C1N1CCC(=O)NC1=O</chem>          | AAGAGAA | 1028 | 1028 |
| 201 | <chem>OC(=O)C1=NOC(=C1)C1=CC=CC=C1</chem>             | TAGGATA | 1071 | 1072 |
| 202 | <chem>COC1=CC=C(C=C1)C1=CC(=NN1)C(O)=O</chem>         | CCTCCTT | 1028 | 1030 |
| 203 | <chem>OC(=O)CCCC1=NC(=NO1)C1=CC=NC=C1</chem>          | CCTAACC | 1028 | 1027 |
| 204 | <chem>OC(=O)C1=CC(NC(=O)C2CCCC2)=CC=C1</chem>         | GGAACAG | 1028 | 1028 |
| 205 | <chem>CN(C)C(=O)N1CCC(CC1)C(O)=O</chem>               | TAGAACC | 1027 | 1027 |
| 206 | <chem>OC(=O)C1CCCC1</chem>                            | GTGCATG | 1023 | 1024 |
| 207 | <chem>CN(C)S(=O)(=O)C1=CC(C(O)=O)=C(C)O1</chem>       | ATTATAT | 1028 | 1028 |
| 208 | <chem>OC(=O)C1=COC=C1</chem>                          | GAGACGT | 1023 | 1023 |
| 209 | <chem>OC(=O)C1=CC=C(Cl)S1</chem>                      | ATGTATG | 1025 | 1024 |
| 210 | <chem>CC1=C(SC(=N1)C1=CC=NC=C1)C(O)=O</chem>          | TCGGCAA | 1028 | 1028 |
| 211 | <chem>CN1N=C(C=C1C(O)=O)C(C)(C)C</chem>               | TTACTAT | 1026 | 1025 |
| 212 | <chem>CC1=C(C=NN1C1=CC=CC=C1)C(O)=O</chem>            | TCCGCGT | 1027 | 1026 |
| 213 | <chem>CN1C=CC=C1C(O)=O</chem>                         | TGTGATA | 1024 | 1024 |
| 214 | <chem>CN1C(=CC2=C1C=CO2)C(O)=O</chem>                 | ACCGATA | 1025 | 1025 |
| 215 | <chem>OC(=O)C1=CC=C(N=C1)C(F)(F)F</chem>              | TACATGC | 1026 | 1025 |
| 216 | <chem>CC1=CC=CN=C1C(O)=O</chem>                       | AATTATG | 1024 | 1022 |
| 217 | <chem>OC(=O)C1=CN=C(O)C=C1</chem>                     | ACCACAT | 1024 | 1023 |
| 218 | <chem>OC(=O)C1=CC=C(Br)C=N1</chem>                    | AGCACAG | 1027 | 1026 |
| 219 | <chem>COC1=C(OC)C(=CC=C1)C(O)=O</chem>                | TGAACAT | 1026 | 1026 |

|     |                                                    |         |      |      |
|-----|----------------------------------------------------|---------|------|------|
| 220 | <chem>COC1=CC=C(C=C1OC)C(O)=O</chem>               | TATTCAT | 1026 | 1027 |
| 221 | <chem>COC1=CC(=CC(OC)=C1)C(O)=O</chem>             | CGTCTTG | 1026 | 1026 |
| 222 | <chem>CN(C)C1=CC=CC(=C1)C(O)=O</chem>              | AGAGCAG | 1025 | 1026 |
| 223 | <chem>OC(=O)C1=CC(F)=C(F)C=C1F</chem>              | TCTATCG | 1026 | 1023 |
| 224 | <chem>OC(=O)C1=CC=C(C=C1)C(F)(F)F</chem>           | GATGTCC | 1026 | 1026 |
| 225 | <chem>OC(=O)C1=C(Cl)C=C(Cl)C=C1</chem>             | TGGAGCG | 1026 | 1027 |
| 226 | <chem>OC(=O)C1=C(F)C=CC(=C1)C(F)(F)F</chem>        | TATCCTG | 1027 | 1027 |
| 227 | <chem>OC(=O)C1=CC=C(Cl)C=C1</chem>                 | AGCGCGG | 1025 | 1024 |
| 228 | <chem>CCOC(=O)CNC1=C(C=CC=C1)C(O)=O</chem>         | TCTGCTA | 1028 | 1026 |
| 229 | <chem>CCOC(=O)CNC1=CC(=CC=C1)C(O)=O</chem>         | CCTATGT | 1028 | 1028 |
| 230 | <chem>OC(=O)C1=NNC(=O)C=C1</chem>                  | ACTCGCC | 1024 | 1024 |
| 231 | <chem>OC(=O)C1=CN=CN=C1</chem>                     | GGTGGTA | 1024 | 1023 |
| 232 | <chem>CN(CCC(O)=O)C1CCN(C)C1</chem>                | CCTTATA | 1026 | 1024 |
| 233 | <chem>CC1(CC(O)=O)N2C=CC=CC2=NC1=O</chem>          | TGACGTT | 1027 | 1027 |
| 234 | <chem>CCN1N=C(C)C=C1C(O)=O</chem>                  | CATACGC | 1025 | 1026 |
| 235 | <chem>OC(=O)C1=CC=NN1</chem>                       | CCTAGAG | 1023 | 1023 |
| 236 | <chem>OC(=O)C1=CN=C1</chem>                        | CATTCAC | 1023 | 1022 |
| 237 | <chem>CC1=CC=C(C(O)=O)C(O)=N1</chem>               | GTATTCA | 1118 | 1120 |
| 238 | <chem>OC(=O)C1=C(N=CC=N1)C(=O)N1CCCC1</chem>       | GACCTCG | 1028 | 1027 |
| 239 | <chem>CN1C=NC2=C(C(C)=C(S2)C(O)=O)C1=O</chem>      | GGCCGTA | 1028 | 1028 |
| 240 | <chem>CC(=O)NC1=CC(=CC(NC(C)=O)=C1)C(O)=O</chem>   | TTCAACG | 1028 | 1028 |
| 241 | <chem>CC1=NOC2=NC(=CC(C(O)=O)=C12)C1CC1</chem>     | AGAGGAC | 1028 | 1028 |
| 242 | <chem>CN1C(=O)NC(=O)C2=C(C=C(C)N=C12)C(O)=O</chem> | TGTATCT | 1122 | 1122 |
| 243 | <chem>OC(=O)C1=CC2=C(NC(=O)C(=O)N2)C=C1</chem>     | CGGCGGT | 1121 | 1122 |
| 244 | <chem>OC(=O)C1CCC=CC1</chem>                       | AATTACA | 1024 | 1023 |
| 245 | <chem>CC1=NN2C(=C1)N=CC(C(O)=O)=C2C</chem>         | CTGTTAG | 1026 | 1026 |
| 246 | <chem>CC1=C(C(O)=O)C(C)=NO1</chem>                 | TTACCTG | 1024 | 1024 |
| 247 | <chem>CN(CC(O)=O)C1=NC=NC2=C1NC=N2</chem>          | TCGTATC | 1121 | 1120 |
| 248 | <chem>OC(=O)C1=CC=C2N=CNC(=O)C2=C1</chem>          | TGCCGCC | 1120 | 1119 |
| 249 | <chem>OC(=O)C1=CC=C(OC2=CC=CN=C2)O1</chem>         | TACCGAC | 1027 | 1028 |
| 250 | <chem>CC1(CC1)C(O)=O</chem>                        | CGTAAGG | 1023 | 1023 |
| 251 | <chem>CC1(CCCCC1)C(O)=O</chem>                     | GGATTAT | 1024 | 1023 |
| 252 | <chem>CC1(CCCC=C1)C(O)=O</chem>                    | CAATATT | 1024 | 1024 |
| 253 | <chem>NC(=O)C1=CC=C(C=C1)C(O)=O</chem>             | TAATAAG | 1025 | 1023 |
| 254 | <chem>COC1=CC=CC(=C1)C(O)=O</chem>                 | GTTGCGG | 1025 | 1025 |
| 255 | <chem>CC(=O)C1=CC=C(C=C1)C(O)=O</chem>             | CATAGAC | 1025 | 1026 |
| 256 | <chem>OC(=O)C1=CC=C(Br)O1</chem>                   | GCGATCT | 1026 | 1026 |
| 257 | <chem>NS(=O)(=O)C1=CC=C(C=C1)C(O)=O</chem>         | AACTATC | 1027 | 1026 |
| 258 | <chem>OC(=O)C1=CC=C(I)C=C1</chem>                  | GCGACA  | 1029 | 1027 |
| 259 | <chem>CC(=O)N[C@H](CC1=CC=C(O)C=C1)C(O)=O</chem>   | GAAGAGA | 1028 | 1027 |
| 260 | <chem>NS(=O)(=O)C1=NN=C(NC(=O)CCC(O)=O)S1</chem>   | CGCCTGG | 1030 | 1028 |
| 261 | <chem>CC1=CC2=C(NC(=O)C2CC(O)=O)C=C1</chem>        | ACGACTT | 1027 | 1027 |
| 262 | <chem>OC(=O)C1CCN(CC1)C(=O)NC1=CC=CC=C1</chem>     | GCCTTCA | 1029 | 1030 |
| 263 | <chem>OC(=O)C1CCCN(C1)C(=O)NC1=CC=CC=C1</chem>     | GGAGTAA | 1029 | 1029 |
| 264 | <chem>CC1=NC(=CS1)C(O)=O</chem>                    | TTATATG | 1024 | 1026 |
| 265 | <chem>OC(=O)C1=CSC(=N1)C(F)(F)F</chem>             | GCGAGTT | 1027 | 1027 |
| 266 | <chem>OC(=O)C1CC2=C(C1)C=CC=C2</chem>              | ACCGTAT | 1025 | 1025 |
| 267 | <chem>CC1(C)CC2=C(O1)C(OCC(O)=O)=CC=C2</chem>      | AAGTCCG | 1028 | 1027 |
| 268 | <chem>OC(=O)C(CC1=CC=CC=C1)NC(=O)C1=CC=CS1</chem>  | TGATTCA | 1030 | 1030 |

|     |                                                               |         |      |      |
|-----|---------------------------------------------------------------|---------|------|------|
| 269 | <chem>CC1=NN(C(C)=C1\C=C\O)=O)C1=CC=CC=C1</chem>              | CCTGATT | 1029 | 1027 |
| 270 | <chem>OC(=O)CN1C=NC=N1</chem>                                 | TGGAGTT | 1024 | 1023 |
| 271 | <chem>OC(=O)C1CN(CCC2=CC=CC=C2)C(=O)C1</chem>                 | CACCATA | 1028 | 1027 |
| 272 | <chem>CC(=O)NC1=NC(C(O)=O)=C(Br)C=C1</chem>                   | GCGTGGC | 1029 | 1029 |
| 273 | <chem>OC(=O)C1=C(ON=C1)C1=CC=CC=C1</chem>                     | CATGGTC | 1026 | 1026 |
| 274 | <chem>CC1=NC(C(O)=O)=C(C)O1</chem>                            | TTGTGCA | 1024 | 1025 |
| 275 | <chem>CC(C)[C@H](N(C)C)C(O)=O</chem>                          | GAGCGTA | 1025 | 1022 |
| 276 | <chem>O[C@@H]1O[C@@H]([C@@H](O)[C@H](O)[C@@H]1O)C(O)=O</chem> | TTAGGAC | 1027 | 1025 |
| 277 | <chem>NC1=C(Br)C=C(C=N1)C(O)=O</chem>                         | AGCAGCA | 1028 | 1027 |
| 278 | <chem>OC(=O)CN1NC(=O)C=CC1=O</chem>                           | TCCATCT | 1119 | 1119 |
| 279 | <chem>OC(=O)C1=C(ON=C1)C1CC1</chem>                           | CAGAAGC | 1025 | 1025 |
| 280 | <chem>OC(=O)C1CN(C2CC2)C(=O)C1</chem>                         | TGCGGCG | 1026 | 1026 |
| 281 | <chem>CN1N=NC2=C1N=CC(=C2)C(O)=O</chem>                       | CAGACAA | 1026 | 1024 |
| 282 | <chem>OC(=O)C1=CC=C(C=C1)S(=O)(=O)NC1CC1</chem>               | GTTATTC | 1029 | 1028 |
| 283 | <chem>OC(=O)C1CCN(CC1)C(=O)C1=CC=CS1</chem>                   | GTCAAGC | 1028 | 1030 |
| 284 | <chem>OC(=O)C1=C(Br)C=CC(=C1)S(=O)(=O)NC1CC1</chem>           | TCACGCA | 1032 | 1033 |
| 285 | <chem>COC1=C(C=C(C=C1)C(O)=O)S(=O)(=O)NC1CC1</chem>           | AAGGCGT | 1030 | 1029 |
| 286 | <chem>CC1=NC2=C(C=CC(=C2)C(O)=O)N1C1CC1</chem>                | ATAATTG | 1028 | 1028 |
| 287 | <chem>OC(=O)CC(CC(O)=O)C1=C(Br)C=CC=C1</chem>                 | CAGCACA | 1124 | 1126 |
| 288 | <chem>CC(O)C(NS(=O)(=O)C1=CC(C)=C(C)C=C1)C(O)=O</chem>        | AGTGTAG | 1030 | 1031 |
| 289 | <chem>CC1=C(C=C(C=C1)S(=O)(=O)NC1CC1)C(O)=O</chem>            | TGCGCAT | 1029 | 1029 |
| 290 | <chem>NC1=C(N=CC=N1)C(O)=O</chem>                             | CCGCCTG | 1024 | 1026 |
| 291 | <chem>OC(=O)C1=C(Cl)C=CC(O)=C1</chem>                         | CTCCAAC | 1026 | 1025 |
| 292 | <chem>COC1=NN2C(CCC(O)=O)=NN=C2C=C1</chem>                    | TGACGGC | 1028 | 1028 |
| 293 | <chem>CN(C)CC1=CNC2=C1C=CC(=C2)C(O)=O</chem>                  | ACTCCTA | 1028 | 1029 |
| 294 | <chem>CC1=C(C(O)=O)C(=NO1)C1=C(Cl)C=CC=C1F</chem>             | AGGCTGT | 1029 | 1030 |
| 295 | <chem>OC(=O)[C@@H]1CC(=O)NC(=O)N1</chem>                      | CATTGCT | 1025 | 1027 |
| 296 | <chem>CC1=NOC2=C1C(=CC(=N2)C1CC1)C(O)=O</chem>                | GCTTAAC | 1028 | 1028 |
| 297 | <chem>NC(=O)NC(CC(O)=O)C1=CC=CS1</chem>                       | GCTAGGA | 1027 | 1028 |
| 298 | <chem>OC(=O)C1=NN(C(=N1)C1=CC=CS1)C1=CC=C(F)C=C1</chem>       | TTATGAT | 1031 | 1031 |
| 299 | <chem>OC(=O)C1=CC2=C(N=C1)N(C1CC1)C(=O)NC2=O</chem>           | AGCGCCA | 1029 | 1027 |
| 300 | <chem>CC1=C(C=NN1C1=NNC(=O)C=C1)C(O)=O</chem>                 | GACTION | 1121 | 1121 |
| 301 | <chem>CC1=NC2=C(C=NN2C(C)=C1)C(O)=O</chem>                    | TTCATGA | 1026 | 1025 |
| 302 | <chem>OC(=O)C1(CC1)C1=CC(Cl)=CC=C1</chem>                     | CCAATGG | 1027 | 1027 |
| 303 | <chem>CCCN1C(=O)NC(=O)C2=C1N=C(C=C2C(O)=O)C1CC1</chem>        | TAAGAGC | 1124 | 1124 |
| 304 | <chem>OC(=O)C1=C(N=CC=N1)C(=O)NCC1=CC=C(F)C=C1</chem>         | CACAGCT | 1030 | 1030 |
| 305 | <chem>OC(=O)CCC(NC(=O)NC1=CC=C(F)C=C1)C(O)=O</chem>           | CTTCGCT | 1124 | 1124 |
| 306 | <chem>CC(NC(=O)C1=CC=C(Br)S1)C(O)=O</chem>                    | ACGATTC | 1030 | 1030 |
| 307 | <chem>CN1N=C(C)C(Br)=C1C(O)=O</chem>                          | TGGCTAT | 1028 | 1028 |
| 308 | <chem>OC(=O)C1CC1C(=O)N1CCN(CC1)C1=CC=CC=C1</chem>            | GTGTTAC | 1030 | 1028 |
| 309 | <chem>OC(=O)C1=CC(=CC=C1)N1NC(=O)C=CC1=O</chem>               | CTAGACG | 1122 | 1120 |
| 310 | <chem>NC(=O)C1=CC=C(S1)C(O)=O</chem>                          | GAGTCTA | 1026 | 1024 |
| 311 | <chem>OC(=O)C1CCN1C(=O)C1=CC=C(Br)C=C1</chem>                 | AGAGTCT | 1031 | 1030 |
| 312 | <chem>OC(=O)C1=CC=C(C=C1)C(F)F</chem>                         | AAGATTA | 1026 | 1029 |
| 313 | <chem>OC(=O)CCN1C=CNC(=O)C1=O</chem>                          | TGGCTCA | 1026 | 1028 |
| 314 | <chem>OC(=O)C1=NNC(=O)C1</chem>                               | CCGTACC | 1024 | 1021 |
| 315 | <chem>OC(=O)C1=C2C=CC=CN2N=C1</chem>                          | AAGGTGG | 1025 | 1025 |
| 316 | <chem>CC1=NC(=CN1)C(O)=O</chem>                               | TAAGATT | 1024 | 1023 |
| 317 | <chem>CC1=NC(C(O)=O)=C(Cl)C=N1</chem>                         | CCACACC | 1026 | 1026 |

|     |                                          |         |      |      |
|-----|------------------------------------------|---------|------|------|
| 318 | <chem>CC1=C(Br)C=NN1CC(O)=O</chem>       | CCAATTA | 1028 | 1028 |
| 319 | <chem>OC(=O)C1=C(Br)SC=N1</chem>         | TGACCAC | 1027 | 1028 |
| 320 | <chem>OC(=O)C1=CN=C(N=C1)C(F)(F)F</chem> | GAATGCC | 1027 | 1027 |
| 321 | N3                                       | ACATTAA | 1022 | 1022 |
| 322 | N3                                       | GTGAGAG | 1025 | 1025 |
| 323 | <chem>CC(O)=O</chem>                     | TAGTATT | 1021 | 1021 |
| 324 | [NH2]                                    | GCGTTA  | 1019 | 1019 |

**Supplementary Table 3 | Structures and codons of the 3<sup>rd</sup> diversity elements with predicted mass and found mass of corresponding conjugates as 31 charge state ions.**

**(h) Characterization of ETH-YL library with 35 million displayed compounds.**

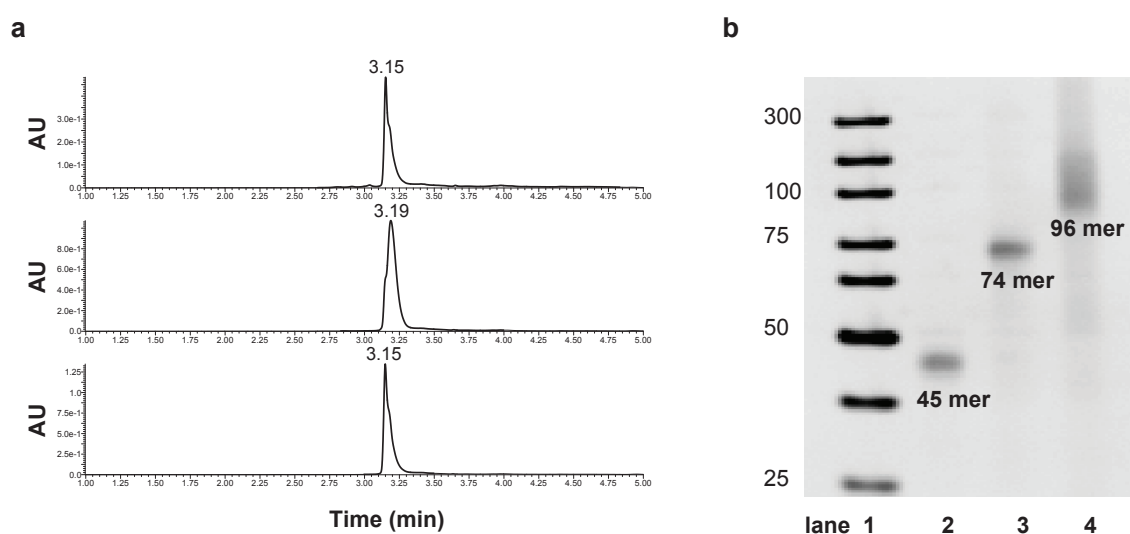

**Supplementary Figure 14 | Characterization of ETH-YL library with UPLC and gel electrophoresis. a** UPLC chromatograms of the 1<sup>st</sup>, 2<sup>nd</sup> and 3<sup>rd</sup> pool. UPLC analyses were performed on a XBridge@ Oligonucleotide BEH C18 10 × 50 mm column at a flow rate of 0.5 mL/min with gradient: 0 % to 5 % B (0 to 0.5 minutes), 5 % B (0.5 to 2 minutes), 5 % to 60 % B (2 to 2.6 minutes), 60 % B (2.6 to 4 minutes), 60 % to 0 % B (4 to 5 minutes) (A= TEA 10 mM, HFIP 5 mM in water, B= MeOH), at 60 °C. Detection by absorbance at 260 nm. **b** 1<sup>st</sup>, 2<sup>nd</sup> and 3<sup>rd</sup> pools were analyzed by denaturing gel electrophoresis. Lane1, Marker; lane 2, 1<sup>st</sup> pool; lane3, 2<sup>nd</sup> pool; lane4, 3<sup>rd</sup> pool.

|                                                                        | 1 <sup>st</sup> Pool | 2 <sup>nd</sup> Pool | 3 <sup>rd</sup> Pool |
|------------------------------------------------------------------------|----------------------|----------------------|----------------------|
| predicted average MW                                                   | 15302                | 24494                | 31475                |
| predicted average MW with charges (16 charges)(26 charges)(32 charges) | 955                  | 979                  | 982                  |
| found average MW with charges                                          | 956                  | 980                  | 983                  |
| theoretical display compounds in Pools                                 | 283                  | 109,238              | 35,393,112           |

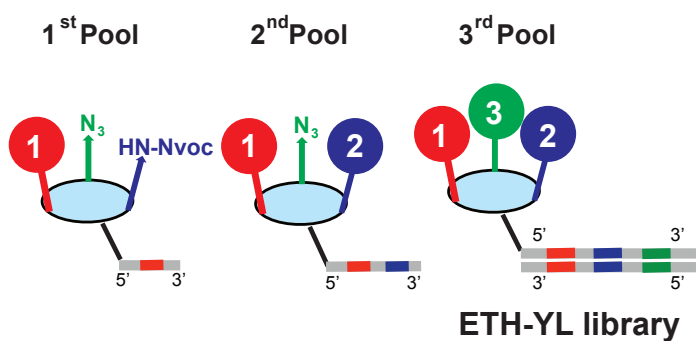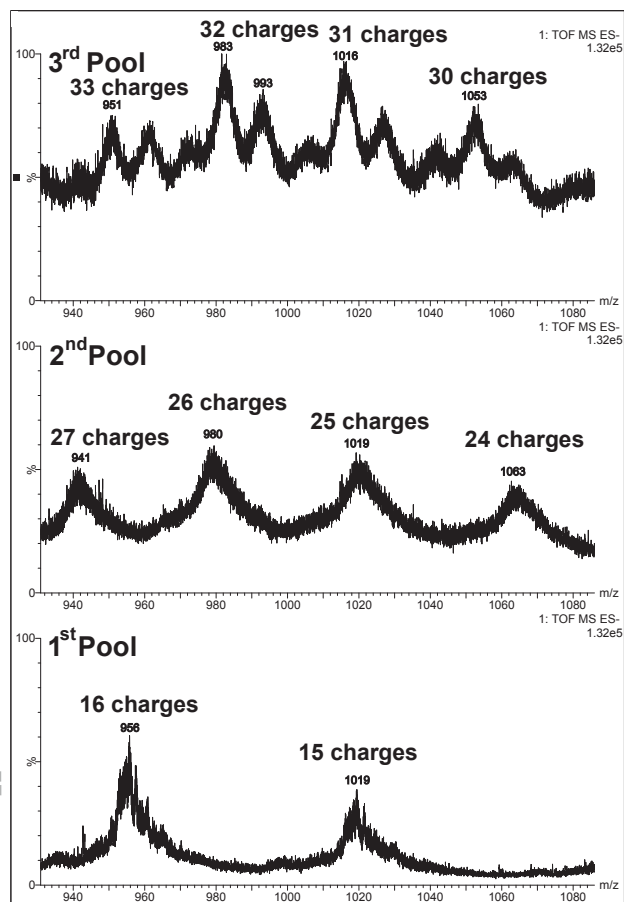

**Supplementary Figure 15 | Summary of predicted average molecular weight (MW) of and found average MW at different charge states for 1<sup>st</sup>, 2<sup>nd</sup> and 3<sup>rd</sup> pool.** MS spectra of 1<sup>st</sup>, 2<sup>nd</sup> and 3<sup>rd</sup> pools, 50 pmol injection. MS analyses were performed on a Xevo G2-XS Q-TOF with electrospray ionization source.

As shown in Supplementary Fig. 14 and Fig. 15, pools of library at different synthesis stages were analyzed by UPLC and electrophoresis, indicating the reliable encoding and reaction efficiency of the **ETH-YL** library.

#### 4. Affinity Selections of the Library against Immobilized Target Proteins.

(a) Target proteins for selections (CAIX, HRP, TNKS 1, HSA, AGP, CaM, PSA, L19TNF and TNF), biotinylation of target proteins and characterization.

| Protein <sup>a</sup>                              | Abbr.   | MS Predicted     | MS Found | Quart. Structure | Supplier                       | Catalog        |
|---------------------------------------------------|---------|------------------|----------|------------------|--------------------------------|----------------|
| Carbonic Anhydrase IX                             | CAIX    | 29 kDa (monomer) | 29044 Da | Dimer            | aa 120-397 <sup>c</sup>        | -              |
| Horseradish Peroxidase                            | HRP     | 43 kDa           | 43175 Da | Monomer          | Thermo Fisher                  | 31490          |
| Tankyrase 1 <sup>b</sup>                          | TNKS 1  | 29 kDa           | 28711 Da | Monomer          | aa 1106-1325-Bioh <sup>c</sup> | -              |
| Albumin from human serum                          | HSA     | 67 kDa           | 66559 Da | Monomer          | Sigma                          | A3782          |
| Alpha 1 Acid Glycoprotein, human Plasma           | AGP     | 19 kDa           | 18186 Da | Monomer          | Athens Research & Technology   | 16-16-010700   |
| Calmodulin                                        | CaM     | 17 kDa           | 16707 Da | Monomer          | EnzoLifeScience                | BML-SE325-0001 |
| Prostate Specific Antigen Protein                 | PSA     | 28 kDa           | 28431 Da | Monomer          | MyBio Source                   | MBS173180      |
| L19 antibody-tumor necrosis factor fusion portein | L19-TNF | 44 kDa (monomer) | 43959 Da | Trimer           | Philogen                       | -              |
| tumor necrosis factor                             | TNF     | 18 kDa (monomer) | 17802 Da | Trimer           | BL21(DE3)                      | -              |

**Supplementary Table 4 | Summary of proteins used in affinity-based selections.** <sup>a</sup> All proteins have the sequence of the human protein. <sup>b</sup>

Tankyrase 1 was biotinylated enzymatically using a Bir A tag. <sup>c</sup> The expression of CAIX, TNKS 1<sup>6</sup>, L19-TNF<sup>7</sup> and TNF was reported previously.

Target proteins (with exception of Tankyrase 1) were chemically biotinylated with EZ-Link<sup>TM</sup> NHS-LC-Biotin (typically with 3-5 equiv. to target protein, Thermo Fisher Scientific, Catalog: 21336) for affinity screening according to supplier's instructions followed by dialysis and characterization by UPLC-MS.

| Protein <sup>a</sup>                  | Abbr. | MS Predicted       | MS Found |
|---------------------------------------|-------|--------------------|----------|
| biotinylated Carbonic Anhydrase IX    | bCAIX | 29384 Da (monomer) | 29366 Da |
| botinylated Horseradish Peroxidase    | bHRP  | 43515 Da           | 43514 Da |
| biotinylated Albumin from human serum | bHSA  | 66900 Da           | 66901 Da |



|                                                                 |          |                    |          |
|-----------------------------------------------------------------|----------|--------------------|----------|
| biotinylated human Alpha 1 Acid Glycoprotein, human Plasma      | bAGP     | 18526 Da           | 18525 Da |
| biotinylated human Calmodulin                                   | bCaM     | 17047 Da           | 17046 Da |
| biotinylated Prostate Specific Antigen Protein                  | bPSA     | 28771 Da           | 28770 Da |
| biotinylated L19 antibody-tumor necrosis factor fusion porotein | bL19-TNF | 44299 Da (monomer) | 44300 Da |
| biotinylated tumor necrosis factor                              | bTNF     | 18273 Da (monomer) | 18273 Da |

**Supplementary Table 5 | Characterization of the biotinylated proteins used in selections.**

**(b) Affinity screening.**

| Portein | Buffer                                | pH  | Beads                                                                            |
|---------|---------------------------------------|-----|----------------------------------------------------------------------------------|
| CAIX    | PBS <sup>a</sup>                      | 7.4 | Dynabeads MyOne™ Steptavidin C1<br>Thermo Fisher Scientific,<br>Catalog: 65001   |
| HRP     | PBS                                   | 7.4 | Dynabeads MyOne™ Steptavidin C1                                                  |
| TNKS 1  | 20 mM Hepes, 200 mM NaCl, 0.5 mM TCEP | 7.5 | Dynabeads MyOne™ Steptavidin M270<br>Thermo Fisher Scientific,<br>Catalog: 65305 |
| HSA     | PBS                                   | 7.4 | Dynabeads MyOne™ Steptavidin C1                                                  |
| AGP     | PBS                                   | 7.4 | Dynabeads MyOne™ Steptavidin T1<br>Thermo Fisher Scientific,<br>Catalog: 65601   |
| CaM     | DPBS <sup>b</sup>                     | 7.4 | Dynabeads MyOne™ Steptavidin C1                                                  |
| PSA     | PBS                                   | 7.4 | Dynabeads MyOne™ Steptavidin T1                                                  |
| L19-TNF | PBS                                   | 7.4 | Dynabeads MyOne™ Steptavidin C1                                                  |
| TNF     | PBS                                   | 7.4 | Dynabeads MyOne™ Steptavidin C1                                                  |

**Supplementary Table 6 | Summary of selection conditions. a**, PBS (Life technologies, Catalog: 10010-015). **b**, DPBS was made from 10

× dulbecco's phosphate buffered saline (sigma, Catalog: D1283) and pH was adjusted to 7.4.

Affinity selections were performed using a KingFisher magnetic particle processor (Thermo Fisher Scientific). Streptavidin-coated magnetic beads (0.1 mg) were resuspended in buffer (100 µl, as summarized in table supplementary table 6) and subsequently incubated with biotinylated target protein (100 µl, 1 µM) for 30 min with continuous gentle mixing. Protein-coated beads were washed three times with buffer + Tween (200 µl, 0.05% v/v Tween 20) that was supplemented with biotin (100 µM) in order to block remaining binding sites of streptavidin, and subsequently incubated with the library (100 µl, 5 nM

total concentration, in buffer + Tween) for 1 h with continuous gentle mixing. After removing unbound library members by washing five times with buffer + Tween (200 µl), beads carrying bound library members were resuspended in elution buffer (100 µl, 10 mM Tris-Cl, pH 8.5, Qiagen, Catalog: 19086) and the DNA-compound conjugates separated from the beads by heat denaturation of streptavidin and the target protein (95 °C for 5 min). The DNA of eluted library members was quantified by qPCR<sup>8</sup> and amplified by PCR (25-35 cycles), introducing at the same time additional, selection-specific DNA barcodes, and submitted to Illumina® high-throughput DNA sequencing (HiSeq 2500, Functional Genomics Center Zurich). Selection results were decoded by an inhouse-written C++ program and visualized using MatLab software version R2013a (8.1.0.604, MathWorks)<sup>9</sup>.

All PCRs were conducted at 95 °C for 3 min, and then 25 - 35 cycles of 95 °C for 45 s (denature), 65 °C for 45 s (anneal/extend), 72 °C for 45 s, finally 72 °C for 5 min.

Selection-specific Primers:

5'- TACACGACGCTCTTCCGATCTNNNNNNGGAGCTTCTGAATTCTGTGTG -3'

5'- CAGACGTGTGCTCTTCCGATCNNNNNNGCTCTGCACGGTCGC -3'

Illumina® Sequencing Primer:

5'- AATGATACGGCGACCACCGAGATCTACACTCTTCCCTACACGACGCTCTTCCGATCT -3'

5'- CAAGCAGAAGACGGCATAACGAGATATTGGCGTGACTGGAGTTCAGACGTGTGCTCTTCCGATC -3'

**Note:** Colored sequences are selection-specific DNA barcodes. N representing variable bases serving as code.

**(c) High-throughput sequencing of the library pool prior to selection.**

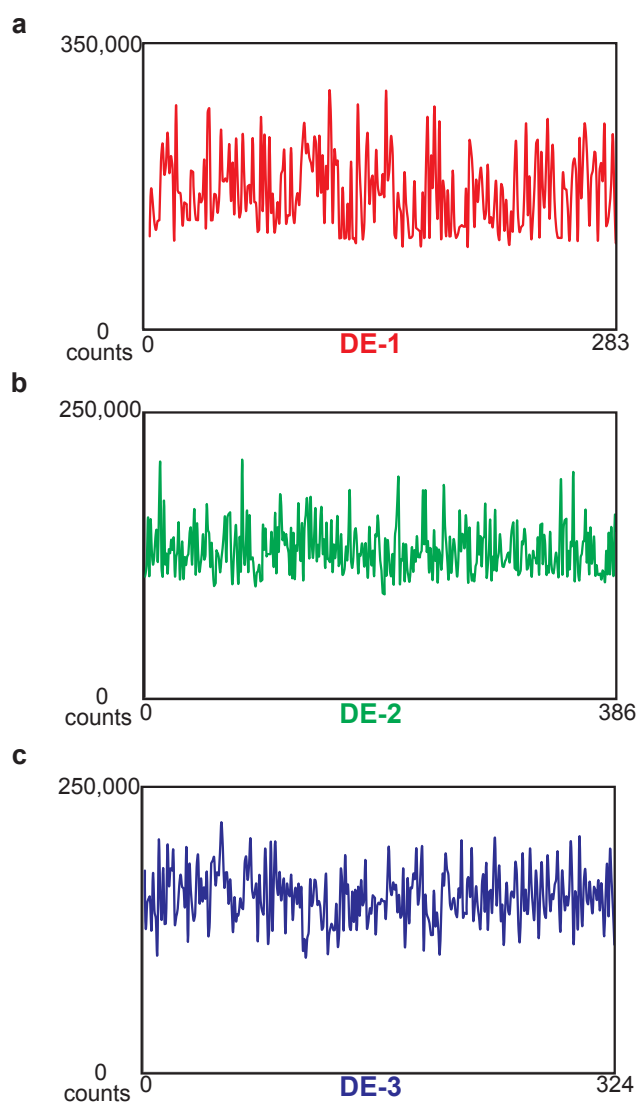

**Supplementary Figure 16 | Distribution of DE-1, DE-2 and DE-3 of the library pool prior to selection. a,** Distribution of **DE-1**, the average is 169,047 counts. **b,** Distribution of **DE-2**, the average is 129,851 counts. **c,** Distribution of **DE-3**, the average is 153,926 counts.

**(d) Enrichment factor calculation.**

$$(1) \quad EF(i, j, k) = SC(i, j, k) \left\{ \sum_x^{283} \left[ \sum_y^{386} \left( \sum_z^{324} SC(x, y, z) \right) \right] \right\} \times 283 \times 386 \times 324$$

where  $EF(i, j, k)$  is the enrichment ( $i, j$  and  $k$  define the number of the diversity element at **DE-1**, **DE-2** and **DE-3**),  $SC(i, j, k)$  is the sequence count. Sum of  $SC(i, j, k)$  is the total sequence counts of one affinity-based selection.

| Target  | Compound | DE-1 | DE-2 | DE-3 | Total sequence counts | Sequence counts | Enrichment |
|---------|----------|------|------|------|-----------------------|-----------------|------------|
| HSA     | HSA-1    | 138  | 115  | 47   | 3,344,294             | 129             | 1365-fold  |
| HSA     | HSA-2    | 95   | 38   | 261  | 3,344,294             | 50              | 529-fold   |
| AGP     | AGP-1    | 36   | 376  | 203  | 1,929,066             | 209             | 3845-fold  |
| AGP     | AGP-2    | 125  | 39   | 163  | 1,929,066             | 109             | 2000-fold  |
| CaM     | CaM-2    | 241  | 314  | 323  | 1,931,086             | 29              | 532-fold   |
| PSA     | PSA-1    | 205  | 182  | 17   | 2,244,812             | 121             | 1908-fold  |
| L19-TNF | TNF-1    | 20   | 361  | 106  | 2,353,006             | 284             | 4272-fold  |
| L19-TNF | TNF-2    | 170  | 65   | 54   | 2,353,006             | 189             | 2842-fold  |
| TNF     | TNF-1    | 20   | 361  | 106  | 2,357,282             | 18              | 270-fold   |
| TNF     | TNF-2    | 170  | 65   | 54   | 2,357,282             | n.d.            | n.d.       |

**Supplementary Table 7 | Summary of enrichment. n.d. means not determined**

## 5. Affinity Measurement of Macrocycles Selected from the Library.

### (a) Affinity determination of HSA binders by fluorescence polarization measurement.

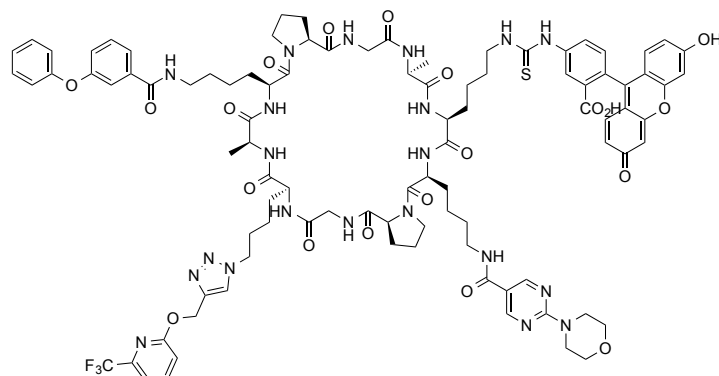

Supplementary Figure 17 | Structure of the HSA binder HSA-1.

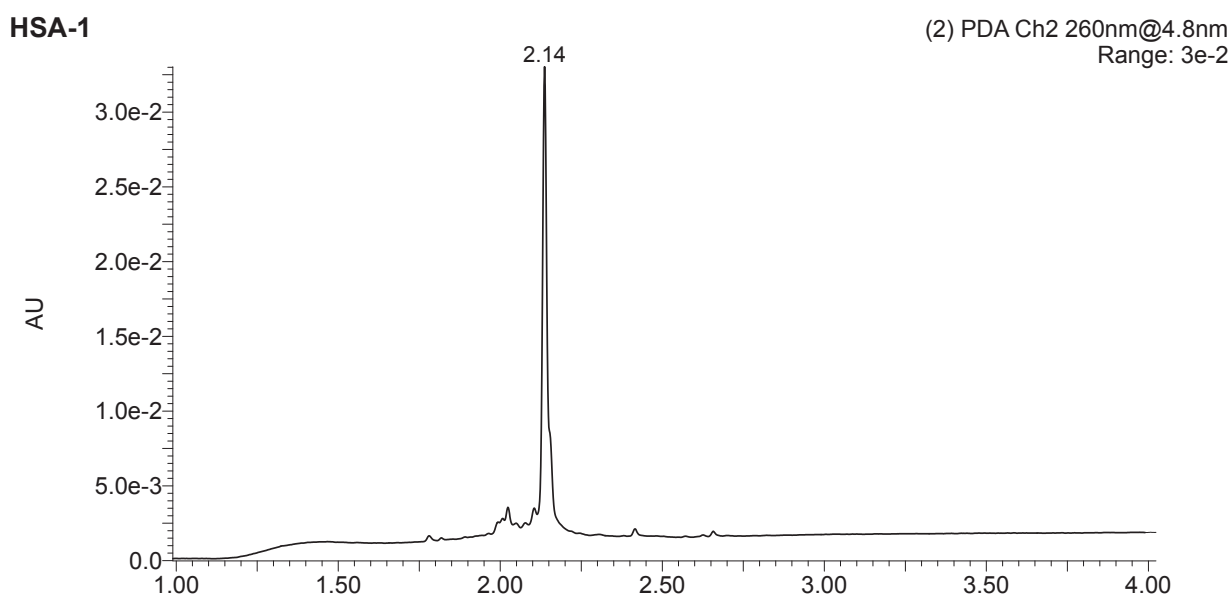

Supplementary Figure 18 | UPLC chromatogram of HSA-1. UPLC analysis was performed on a BEH C18 2.1 × 50 mm column at a flow rate of 0.6 mL/min with gradient: 5 % B (0 to 0.5 minutes), 5 % to 100 % B (0.5 to 4 minutes), 100 % B (4 to 6 minutes), (A= 0.1 % formic acid in water, B= CH<sub>3</sub>CN with 0.1 % formic acid), at 40 °C. Detection by absorbance at 260 nm.

**HSA-1 synthesis:** The linear decapeptide was assembled on Fmoc-Gly-2-chlorotritylchloride® Tenta gel-resin (0.1 mmol, loading of 0.17 mmol/g) using the general procedure with following sequence: Fmoc-*L*-Pro-OH, Fmoc-*L*-Lys(Dde)-OH (Senn, Catalog: 100569), Dde-off (hydroxylamine HCl salt 1.3 g, imidazole 900 mg in 6 mL of NMP : DCM = 5 : 1), DE-1-BB138 (2 equiv., TCI, Catalog: P1253-5G), Fmoc-*L*-Ala-OH, Fmoc-*L*-Lys(N<sub>3</sub>)-OH, DE-3-BB47 (2 equiv., Enamine, Catalog: EN300-

192983; CuI, 10 %; TBTA, 10 % in 6 mL of THF : DCM = 4 : 1 overnight at 25 °C), Fmoc-Gly-OH, Fmoc-L-Pro-OH, Fmoc-L-Lys(Dde)-OH, Dde-off, DE-2-BB115 (2 equiv., Maybridge, Catalog: CC69501DA), Fmoc-L-Lys(Boc)-OH, Fmoc-L-Ala-OH. The peptide was released from the resin using cleavage solution of TFE/AcOH/DCM (2:1:7). Linear protected peptide was obtained as a white solid powder after precipitation, washing with diethyl ether, dissolved by CH<sub>3</sub>CN/H<sub>2</sub>O (1:1) and lyophilized. The linear decapeptide (5 mM) was dissolved in DMF and the pH was adjusted to 9 by addition of DIPEA. PyBOP (1.0 equiv.) was added and the solution stirred at 25 °C for 1 h. Solvent was removed under reduced pressure and the residue dissolved in CH<sub>3</sub>CN/H<sub>2</sub>O (1:1) and reverse-phase HPLC purification was performed. The desired cyclodecapeptide was recovered as a white powder after lyophilization. To the cyclodecapeptide was added 1 mL H<sub>2</sub>O and 20 mL TFA and the solution stirred at room temperature for 1 hour. Solvent was removed under reduced pressure and the residue dissolved in CH<sub>3</sub>CN/H<sub>2</sub>O (1:1). The desired cyclodecapeptide **HSA-1-amino** was recovered as a white powder after lyophilization. **HSA-1-amino** (0.5 M) was dissolved in DMF and DIPEA was added (5.0 equiv.). FITC (1.2 equiv., TCI, F0026-1G) was added and the solution stirred at 25 °C for 1 h. Solvent was removed under reduced pressure and the residue dissolved in CH<sub>3</sub>CN/H<sub>2</sub>O (1:1) and reverse-phase HPLC purification. The desired HAS binder **HSA-1** was recovered as a yellow powder after lyophilization. **HRMS (*m/z*, C<sub>96</sub>H<sub>111</sub>F<sub>3</sub>N<sub>21</sub>O<sub>20</sub>S, ESI):** calculated [M+H]<sup>+</sup>: 1966.7897; found: 1966.8037.

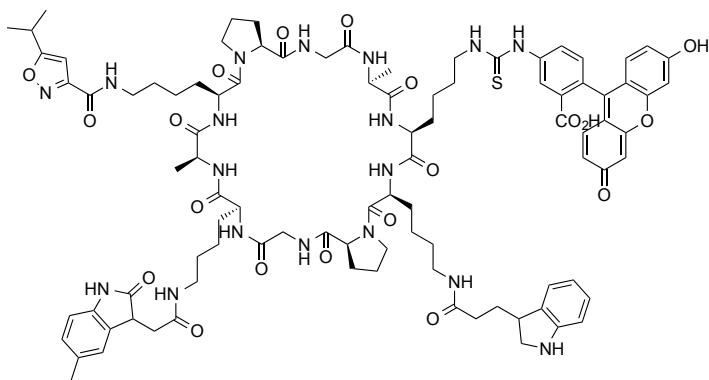

**Supplementary Figure 19 | Structure of the HSA binder HSA-2.**

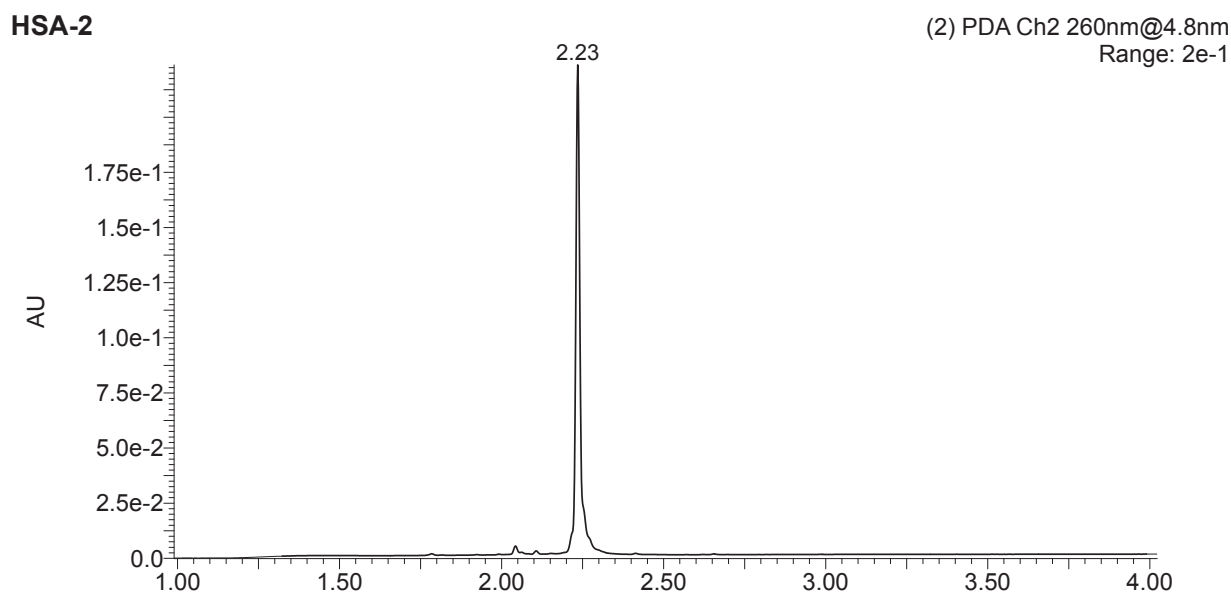

**Supplementary Figure 20 | UPLC chromatogram of HSA-2.** UPLC analyses were performed on a BEH C18 2.1 × 50 mm column at a flow rate of 0.6 mL/min with gradient: 5 % B (0 to 0.5 minutes), 5 % to 100 % B (0.5 to 4 minutes), 100 % B (4 to 6 minutes), (A= 0.1 % formic acid in water, B= CH<sub>3</sub>CN with 0.1 % formic acid), at 40 °C. Detection by absorbance at 260 nm.

**HSA-2 synthesis:** The linear decapeptide was assembled on Fmoc-Gly-2-chlorotriylchloride® Tenta gel-resin (0.1 mmol, loading of 0.17 mmol/g) using the general procedure with following sequence: Fmoc-*L*-Pro-OH, Fmoc-*L*-Lys(Dde)-OH, Dde-off, DE-1-BB95 (2 equiv., ChemBridge, Catalog: 4003153), Fmoc-*L*-Ala-OH, Fmoc-*L*-Lys(Dde)-OH, DE-3-BB261 (2 equiv., SigmaAldrich, Catalog: CBR01145), Fmoc-Gly-OH, Fmoc-*L*-Pro-OH, Fmoc-*L*-Lys(Dde)-OH, Dde-off, DE-2-BB38 (2 equiv., SigmaAldrich, Catalog: CDS003058), Fmoc-*L*-Lys(Boc)-OH, Fmoc-*L*-Ala-OH. The peptide was released from the resin using cleavage solution of TFE/AcOH/DCM (2:1:7). Linear protected peptide was obtained as a white solid powder after precipitation, washing with diethyl ether, dissolved by CH<sub>3</sub>CN/H<sub>2</sub>O (1:1) and lyophilized. The linear decapeptide (5 mM) was dissolved in DMF and the pH was adjusted to 9 by addition of DIPEA. PyBOP (1.0 equiv.) was added and the solution stirred at 25 °C for 1 h. Solvent was removed under reduced pressure and the residue dissolved in CH<sub>3</sub>CN/H<sub>2</sub>O (1:1) and reverse-phase HPLC purification was performed. The desired cyclodecapeptide was recovered as a white powder after lyophilization. To the cyclodecapeptide was added 1 mL H<sub>2</sub>O and 20 mL TFA and the solution stirred at room temperature for 1 hour. Solvent was removed under reduced pressure and the residue dissolved in CH<sub>3</sub>CN/H<sub>2</sub>O (1:1). The desired cyclodecapeptide **HSA-2-amino** was recovered as a white powder after lyophilization. **HSA-2-amino** (0.5 M) was dissolved in DMF and DIPEA was added (5.0 equiv.). FITC (1.2 equiv.) was added and the solution stirred at 25 °C for 1 h. Solvent was removed under reduced pressure and the residue dissolved in CH<sub>3</sub>CN/H<sub>2</sub>O (1:1) and reverse-phase HPLC purification was performed. The desired

HSA binder **HSA-2** was recovered as a yellow powder after lyophilization. **HRMS ( $m/z$ ,  $C_{94}H_{117}N_{18}O_{20}S$ , ESI):** calculated  $[M+H]^+$ : 1849.8412; found: 1849.8433.

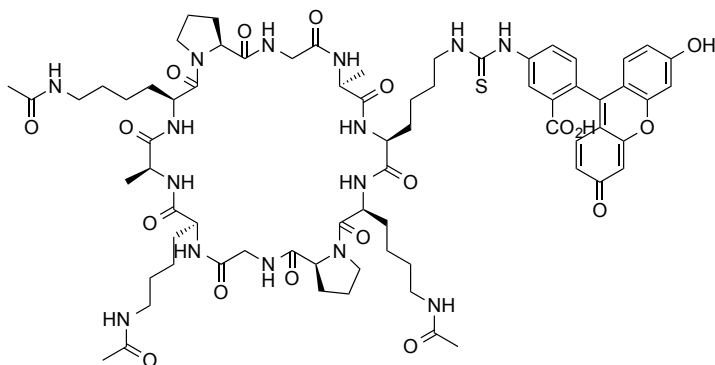

**Supplementary Figure 21 | Structure of the scaffold control SC-1.** UPLC analyses were performed on a BEH C18 2.1 × 50 mm column at a flow rate of 0.6 mL/min with gradient: 5 % B (0 to 0.5 minutes), 5 % to 100 % B (0.5 to 4 minutes), 100 % B (4 to 6 minutes), (A= 0.1 % formic acid in water, B=  $CH_3CN$  with 0.1 % formic acid), at 40 °C. Detection by absorbance at 260 nm.

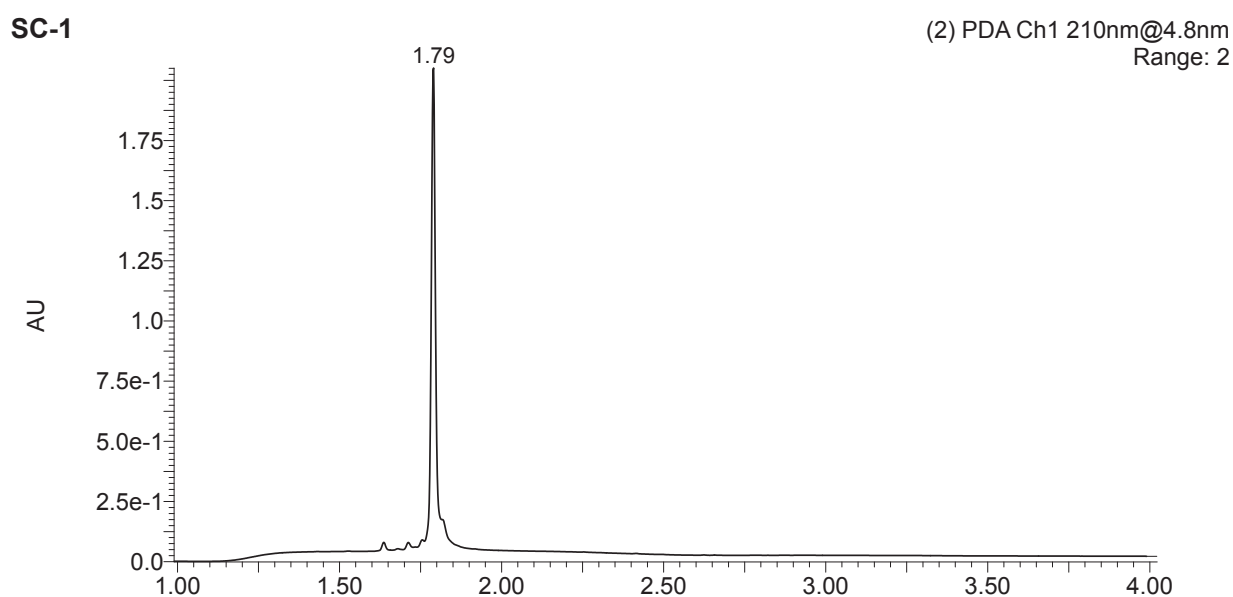

**Supplementary Figure 22 | UPLC chromatogram of SC-1.** UPLC analyses were performed on a BEH C18 2.1 × 50 mm column at a flow rate of 0.6 mL/min with gradient: 5 % B (0 to 0.5 minutes), 5 % to 100 % B (0.5 to 4 minutes), 100 % B (4 to 6 minutes), (A= 0.1 % formic acid in water, B=  $CH_3CN$  with 0.1 % formic acid), at 40 °C. Detection by absorbance at 210 nm.

**Scaffold control SC-1 synthesis:** The linear decapeptide was assembled on Fmoc-Gly-2-chlorotriylchloride® Tenta gel-resin (0.1 mmol, loading of 0.17 mmol/g) using the general procedure with following sequence: Fmoc-*L*-Pro-OH, Fmoc-*L*-Lys(Ac)-OH (2 equiv., Senn, Catalog: 101317), Fmoc-*L*-Ala-OH, Fmoc-*L*-Lys(Ac)-OH, Fmoc-Gly-OH, Fmoc-*L*-Pro-OH, Fmoc-*L*-Lys(Ac)-OH, Fmoc-*L*-Lys(Boc)-OH, Fmoc-*L*-Ala-OH. The peptide was released from the resin using cleavage



solution of TFE/AcOH/DCM (2:1:7). Linear protected peptide was obtained as a white solid powder after precipitation, washing with diethyl ether, dissolved by CH<sub>3</sub>CN/H<sub>2</sub>O (1:1) and lyophilized. The linear decapeptide (5 mM) was dissolved in DMF and the pH was adjusted to 9 by addition of DIPEA. PyBOP (1.0 equiv.) was added and the solution stirred at 25 °C for 1 h. Solvent was removed under reduced pressure and the residue dissolved in CH<sub>3</sub>CN/H<sub>2</sub>O (1:1) and reverse-phase HPLC purification was performed. The desired cyclodecapeptide was recovered as a white powder after lyophilization. To the cyclodecapeptide was added 1 mL H<sub>2</sub>O and 20 mL TFA and the solution stirred at room temperature for 1 hour. Solvent was removed under reduced pressure and the residue dissolved in CH<sub>3</sub>CN/H<sub>2</sub>O (1:1). The desired cyclodecapeptide **SC-1-amino** was recovered as a white powder after lyophilization. **SC-1-amino** (0.5 M) was dissolved in DMF and DIPEA was added (5.0 equiv.). FITC (1.2 equiv.) was added and the solution stirred at 25 °C for 1 h. Solvent was removed under reduced pressure and the residue dissolved in CH<sub>3</sub>CN/H<sub>2</sub>O (1:1) and reverse-phase HPLC purification was performed. The desired scaffold control **SC-1** was recovered as a yellow powder after lyophilization. **HRMS (m/z, C<sub>71</sub>H<sub>96</sub>N<sub>15</sub>O<sub>18</sub>S, ESI):** calculated [M+H]<sup>+</sup>: 1478.6779; found: 1478.6789.

**Fluorescence polarization measurement with HSA binder:** Freshly dissolved fluorescein labelled macrocycle (7.5 μL, final concentration 50 nM, final DMSO content adjusted to 1% in PBS) was incubated at 22 °C for 10 min in a black 384-well plate (Greiner, non-binding) in PBS (pH 7.4, Life technologies, Catalog: 10010-015) with increasing concentrations of HSA to a final volume of 15 μL. The fluorescence anisotropy was measured on a Spectra Max Paradigm multimode plate reader (Molecular Devices). Experiments were performed in triplicate and the mean anisotropy values fitted to equation (3) using KaleidaGraph 4.1.3 (Synergy Software),

$$(2) \quad A = \frac{1}{2} \left\{ ([P]_0 + [L]_0 + K_D) - \sqrt{([P]_0 + [L]_0 + K_D)^2 - 4[P]_0[L]_0} \right\}$$

$$(3) \quad AI = \alpha + \beta A$$

where *AI* is anisotropy,  $\alpha$ ,  $\beta$  are fitting parameters,  $[P]_0$  is total protein concentration,  $[L]_0$  is total concentration of the fluorescently labeled binder,  $K_D$  is the dissociation constant.

(b) Affinity determination of AGP binders by fluorescence polarization measurement.

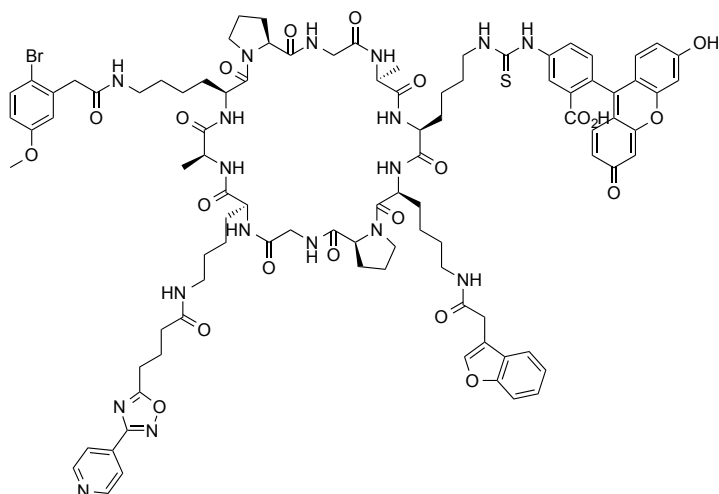

Supplementary Figure 23 | Structure of the AGP binder AGP-1.

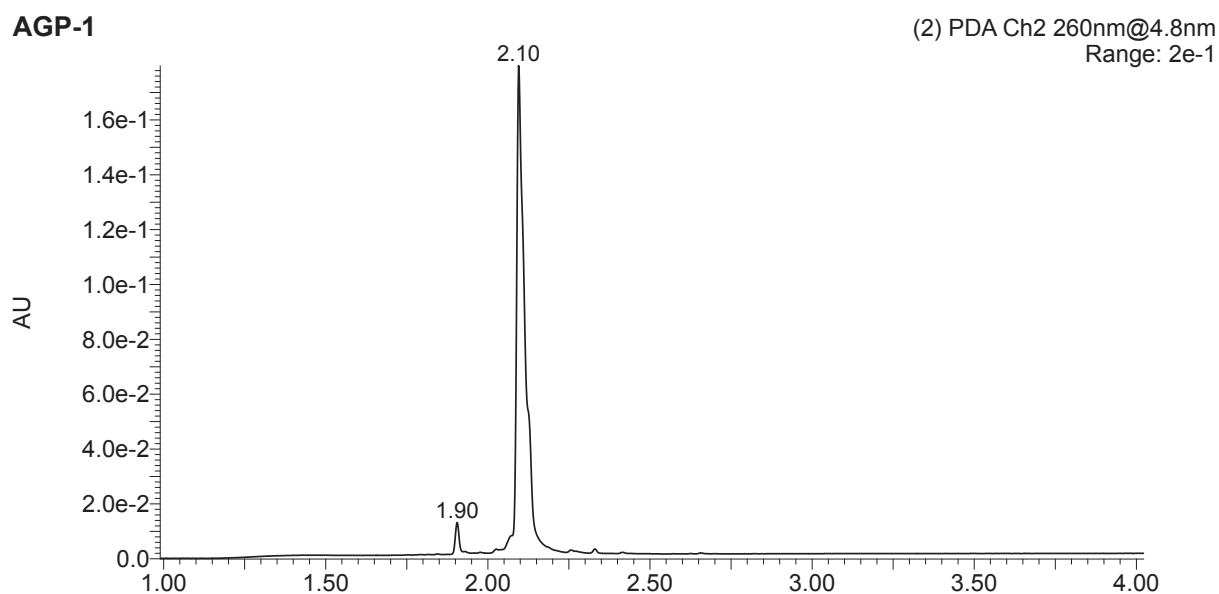

Supplementary Figure 24 | UPLC chromatogram of AGP-1. UPLC analyses were performed on a BEH C18 2.1 × 50 mm column at a flow rate of 0.6 mL/min with gradient: 5 % B (0 to 0.5 minutes), 5 % to 100 % B (0.5 to 4 minutes), 100 % B (4 to 6 minutes), (A= 0.1 % formic acid in water, B= CH<sub>3</sub>CN with 0.1 % formic acid), at 40 °C. Detection by absorbance at 260 nm.

**AGP-1 synthesis:** The linear decapeptide was assembled on Fmoc-Gly-2-chlorotrylchloride® Tenta gel-resin (0.1 mmol, loading of 0.17 mmol/g) using the general procedure with following sequence: Fmoc-*L*-Pro-OH, Fmoc-*L*-Lys(Dde)-OH, Dde-off, DE-1-BB36 (2 equiv., SigmaAldrich, Catalog: CDS023568), Fmoc-*L*-Ala-OH, Fmoc-*L*-Lys(Dde)-OH, Dde-off, DE-3-BB203 (2 equiv., ChemBridge, Catalog: 9071001), Fmoc-Gly-OH, Fmoc-*L*-Pro-OH, Fmoc-*L*-Lys(Dde)-OH, Dde-off, DE-2-

BB376 (2 equiv., Apollo, Catalog: 225074), Fmoc-*L*-Lys(Boc)-OH, Fmoc-*L*-Ala-OH. The peptide was released from the resin using cleavage solution of TFE/AcOH/DCM (2:1:7). Linear protected peptide was obtained as a white solid powder after precipitation, washing with diethyl ether, dissolved by CH<sub>3</sub>CN/H<sub>2</sub>O (1:1) and lyophilized. The linear decapeptide (5 mM) was dissolved in DMF and the pH was adjusted to 9 by addition of DIPEA. PyBOP (1.0 equiv.) was added and the solution stirred at 25 °C for 1 h. Solvent was removed under reduced pressure and the residue dissolved in CH<sub>3</sub>CN/H<sub>2</sub>O (1:1) and reverse-phase HPLC purification was performed. The desired cyclodecapeptide was recovered as a white powder after lyophilization. To the cyclodecapeptide was added 1 mL H<sub>2</sub>O and 20 mL TFA and the solution stirred at room temperature for 1 hour. Solvent was removed under reduced pressure and the residue dissolved in CH<sub>3</sub>CN/H<sub>2</sub>O (1:1). The desired cyclodecapeptide **AGP-1-amino** was recovered as a white powder after lyophilization. **AGP-1-amino** (0.5 M) was dissolved in DMF and DIPEA was added (5.0 equiv.). FITC (1.2 equiv., TCI,) was added and the solution stirred at 25 °C for 1 h. Solvent was removed under reduced pressure and the residue dissolved in CH<sub>3</sub>CN/H<sub>2</sub>O (1:1) and reverse-phase HPLC purification was performed. The desired AGP binder **AGP-1** was recovered as a yellow powder after lyophilization. **HRMS** (*m/z*, C<sub>95</sub>H<sub>112</sub>BrN<sub>18</sub>O<sub>21</sub>S, ESI): calculated [M+H]<sup>+</sup>: 1951.7154; found: 1951.7183.

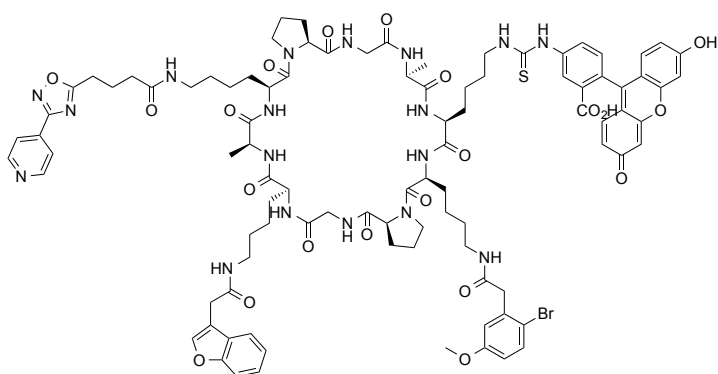

**Supplementary Figure 25 | Structure of the AGP binder AGP-2.**

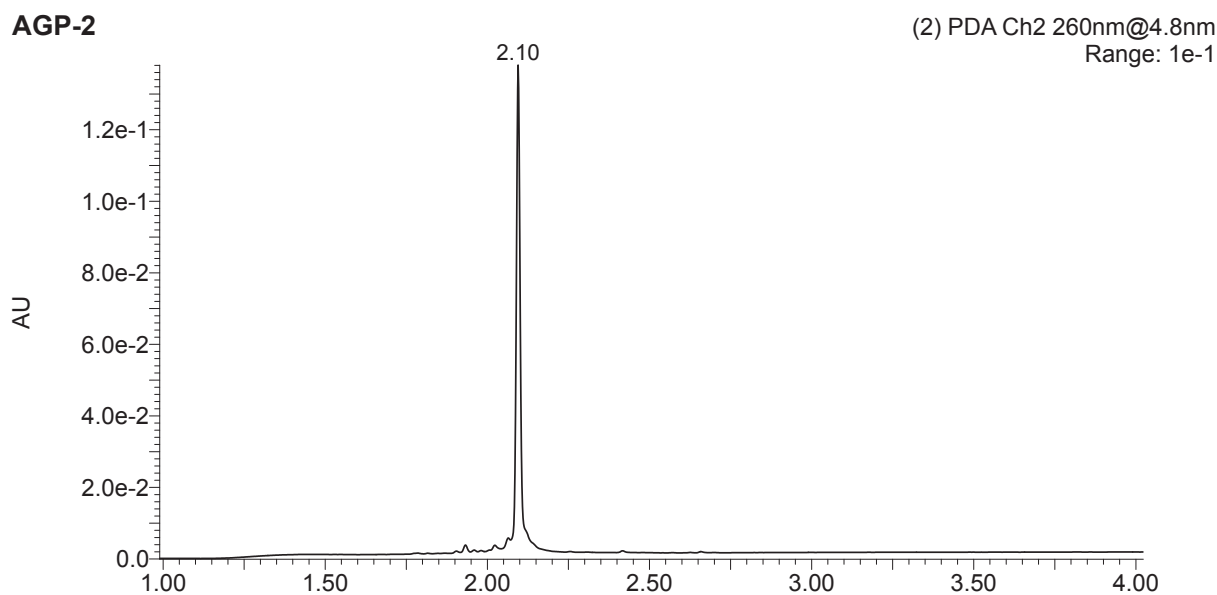

**Supplementary Figure 26 | UPLC chromatogram of AGP-2.** UPLC analyses were performed on a BEH C18 2.1 × 50 mm column at a flow rate of 0.6 mL/min with gradient: 5 % B (0 to 0.5 minutes), 5 % to 100 % B (0.5 to 4 minutes), 100 % B (4 to 6 minutes), (A= 0.1 % formic acid in water, B= CH<sub>3</sub>CN with 0.1 % formic acid), at 40 °C. Detection by absorbance at 260 nm.

**AGP-2 synthesis:** The linear decapeptide was assembled on Fmoc-Gly-2-chlorotriylchloride® Tenta gel-resin (0.1 mmol, loading of 0.17 mmol/g) using the general procedure with following sequence: Fmoc-*L*-Pro-OH, Fmoc-*L*-Lys(Dde)-OH, Dde-off, DE-1-BB125 (2 equiv., ChemBridge, Catalog: 9071001), Fmoc-*L*-Ala-OH, Fmoc-*L*-Lys(Dde)-OH, Dde-off, DE-3-BB163 (2 equiv., Apollo, Catalog: 225074), Fmoc-Gly-OH, Fmoc-*L*-Pro-OH, Fmoc-*L*-Lys(Dde)-OH, Dde-off, DE-2-BB39 (2 equiv., SigmaAldrich, Catalog: CDS023568), Fmoc-*L*-Lys(Boc)-OH, Fmoc-*L*-Ala-OH. The peptide was released from the resin using cleavage solution of TFE/AcOH/DCM (2:1:7). Linear protected peptide was obtained as a white solid powder after precipitation, washing with diethyl ether, dissolved by CH<sub>3</sub>CN/H<sub>2</sub>O (1:1) and lyophilized. The linear decapeptide (5 mM) was dissolved in DMF and the pH was adjusted to 9 by addition of DIPEA. PyBOP (1.0 equiv.) was added and the solution stirred at 25 °C for 1 h. Solvent was removed under reduced pressure and the residue dissolved in CH<sub>3</sub>CN/H<sub>2</sub>O (1:1) and reverse-phase HPLC purification was performed. The desired cyclodecapeptide was recovered as a white powder after lyophilization. To the cyclodecapeptide was added 1 mL H<sub>2</sub>O and 20 mL TFA and the solution stirred at room temperature for 1 hour. Solvent was removed under reduced pressure and the residue dissolved in CH<sub>3</sub>CN/H<sub>2</sub>O (1:1). The desired cyclodecapeptide **AGP-2-amino** was recovered as a white powder after lyophilization. **AGP-2-amino** (0.5 M) was dissolved in DMF and DIPEA was added (5.0 equiv.). FITC (1.2 equiv.) was added and the solution stirred at 25 °C for 1 h. Solvent was removed under reduced pressure and the residue dissolved in CH<sub>3</sub>CN/H<sub>2</sub>O (1:1) and reverse-phase HPLC purification was performed. The desired



Lys(Dde)-OH, Dde-off, DE-2-BB376 (2 equiv., Apollo, Catalog: 225074), Fmoc-L-Lys(Boc)-OH, Ac-Gly-OH(2 equiv., SigmaAldrich, Catalog: A16300). The peptide was released from the resin using cleavage solution of TFE/AcOH/DCM (2:1:7). Linear protected peptide was obtained as a white solid powder after precipitation, washing with diethyl ether, dissolved by CH<sub>3</sub>CN/H<sub>2</sub>O (1:1) and lyophilized. The desired decapeptide **AGP-1-linear-amino** was recovered as a white powder after lyophilization. **AGP-1-linear-amino** (0.5 M) was dissolved in DMF and DIPEA was added (5.0 equiv.). FITC (1.2 equiv.) was added and the solution stirred at 25 °C for 1 h. Solvent was removed under reduced pressure and the residue dissolved in CH<sub>3</sub>CN/H<sub>2</sub>O (1:1) and reverse-phase HPLC purification was performed. The desired linear AGP binder **AGP-1-linear** was recovered as a yellow powder after lyophilization. **HRMS (*m/z*, C<sub>89</sub>H<sub>104</sub>BrN<sub>18</sub>O<sub>23</sub>S, ESI):** calculated [M+H]<sup>+</sup>: 1903.6426; found: 1903.6477.

**Fluorescence polarization measurement with AGP binder:** Freshly dissolved fluorescein labeled macrocycles (7.5 μL, final concentration 50 nM, final DMSO content adjusted to 1% in PBS) were incubated at 22 °C for 10 min in a black 384-well plate in PBS (pH 7.4) with increasing concentrations of AGP to a final volume of 15 μL. The fluorescence anisotropy was measured on a Spectra Max Paradigm multimode plate reader. Experiments were performed in triplicate and the mean anisotropy values fitted to equation (3) using KaleidaGraph 4.1.3.

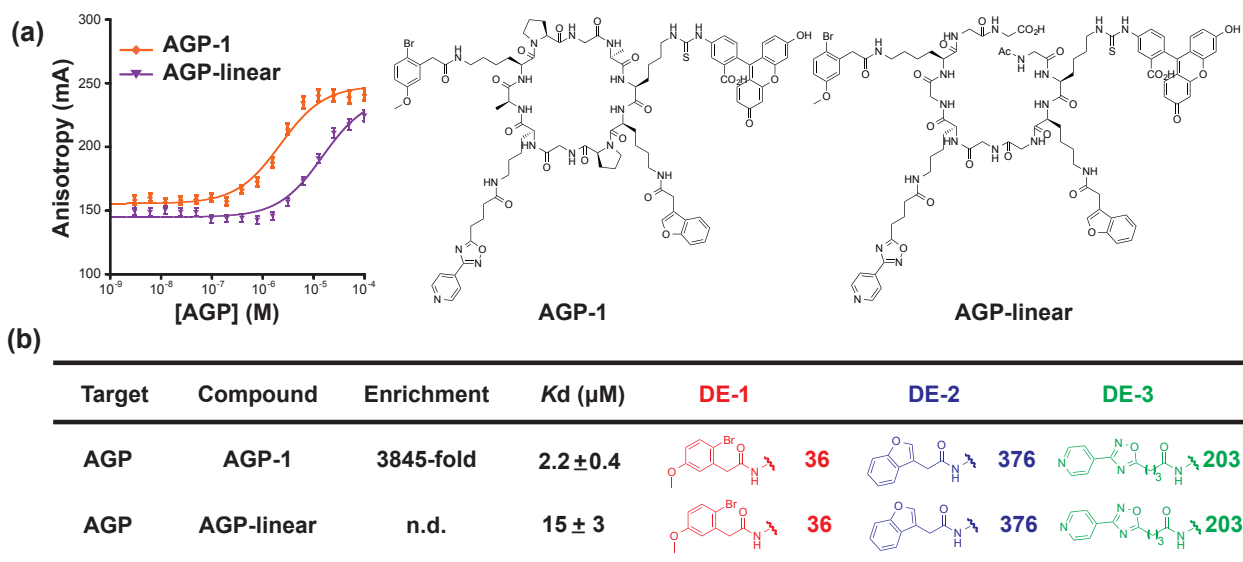

**Supplementary Figure 29 | Comparison of cyclized APG binder and linear APG binder.** a, Structure of the linear AGP binder **AGP-1** and **AGP-1-linear**. b, Summary of K<sub>d</sub> determination by fluorescence polarization.



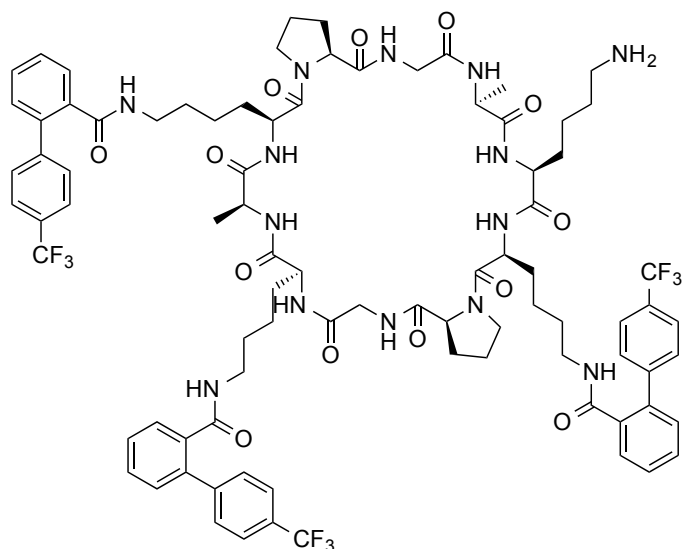

Supplementary Figure 32 | Structure of the CaM binder CaM-3-amino.

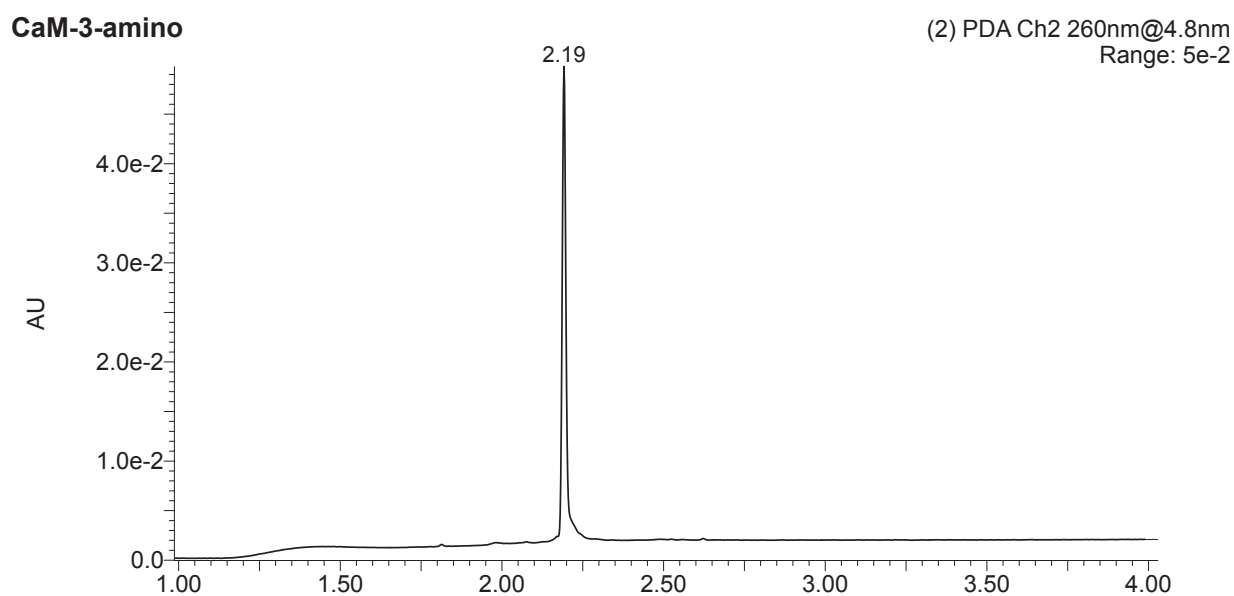

Supplementary Figure 33 | UPLC chromatogram of CaM-3-amino. UPLC analyses were performed on a BEH C18 2.1 × 50 mm column at a flow rate of 0.6 mL/min with gradient: 5 % B (0 to 0.5 minutes), 5 % to 100 % B (0.5 to 4 minutes), 100 % B (4 to 6 minutes), (A= 0.1 % formic acid in water, B= CH<sub>3</sub>CN with 0.1 % formic acid), at 40 °C. Detection by absorbance at 260 nm.

**CaM-3 synthesis:** The linear decapeptide was assembled on Fmoc-Gly-2-chlorotriylchloride® Tenta gel-resin (0.1 mmol, loading of 0.17 mmol/g) using the general procedure with following sequence: Fmoc-*L*-Pro-OH, Fmoc-*L*-Lys(Dde)-OH, Dde-off, DE-1-BB241 (2 equiv., SigmaAldrich, Catalog: 346357), Fmoc-*L*-Ala-OH, , Fmoc-*L*-Lys(Dde)-OH, Dde-off, DE-1-BB241 (2 equiv., SigmaAldrich, Catalog: 346357), Fmoc-Gly-OH, Fmoc-*L*-Pro-OH, Fmoc-*L*-Lys(Dde)-OH, Dde-off, DE-2-BB314 (2 equiv., SigmaAldrich, Catalog: 346357), Fmoc-*L*-Lys(Boc)-OH, Fmoc-*L*-Ala-OH. The peptide was released from the resin using cleavage solution of TFE/AcOH/DCM (2:1:7). Linear protected peptide was obtained as a white solid powder after precipitation, washing with diethyl ether, dissolved by CH<sub>3</sub>CN/H<sub>2</sub>O (1:1) and lyophilized. The linear decapeptide (5 mM)



was dissolved in DMF and the pH was adjusted to 9 by addition of DIPEA. PyBOP (1.0 equiv.) was added and the solution stirred at 25 °C for 1 h. Solvent was removed under reduced pressure and the residue dissolved in CH<sub>3</sub>CN/H<sub>2</sub>O (1:1) and reverse-phase HPLC purification was performed. The desired cyclodecapeptide was recovered as a white powder after lyophilization. To the cyclodecapeptide was added 1 mL H<sub>2</sub>O and 20 mL TFA and the solution stirred at room temperature for 1 hour. Solvent was removed under reduced pressure and the residue dissolved in CH<sub>3</sub>CN/H<sub>2</sub>O (1:1). The desired cyclodecapeptide **CaM-3-amino** was recovered as a white powder after lyophilization. **HRMS (*m/z*, C<sub>86</sub>H<sub>100</sub>F<sub>9</sub>N<sub>14</sub>O<sub>13</sub>, ESI):** calculated [M+H]<sup>+</sup>: 1707.7451; found: 1707.7021. **CaM-3-amino** (0.5 M) was dissolved in DMF and DIPEA was added (5.0 equiv.). FITC (1.2 equiv., TCI) was added and the solution stirred at 25 °C for 1 h. Solvent was removed under reduced pressure and the residue dissolved in CH<sub>3</sub>CN/H<sub>2</sub>O (1:1) and reverse-phase HPLC purification was performed. The desired CaM binder **CaM-3** was recovered as a yellow powder after lyophilization. **HRMS (*m/z*, C<sub>107</sub>H<sub>111</sub>F<sub>9</sub>N<sub>15</sub>O<sub>18</sub>S, ESI):** calculated [M+H]<sup>+</sup>: 2096.7808; found: 2096.7821.

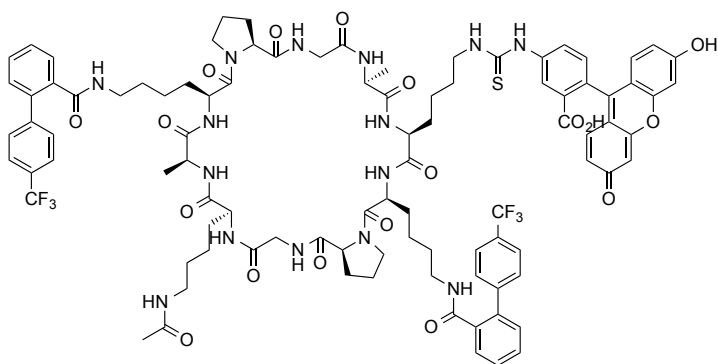

Supplementary Figure 34 | Structure of the CaM binder CaM-2.

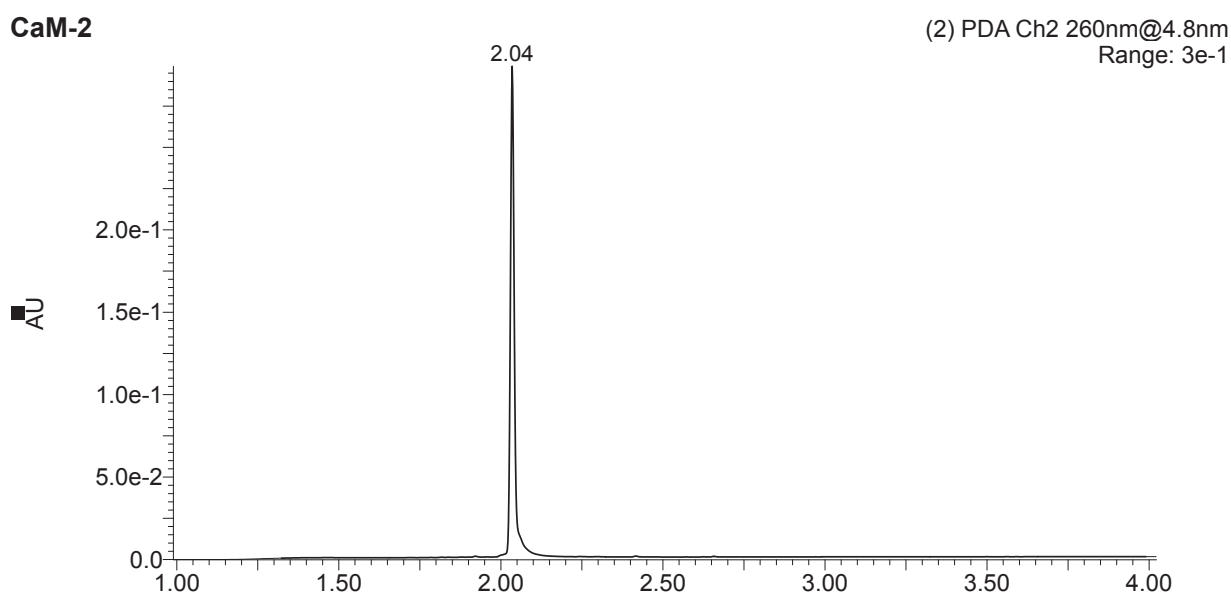

**Supplementary Figure 35 | UPLC chromatogram of CaM-2.** UPLC analyses were performed on a BEH C18 2.1 × 50 mm column at a flow rate of 0.6 mL/min with gradient: 5 % B (0 to 0.5 minutes), 5 % to 100% B (0.5 to 4 minutes), 100 % B (4 to 6 minutes), (A= 0.1 % formic acid in water, B= CH<sub>3</sub>CN with 0.1 % formic acid), at 40 °C. Detection by absorbance at 260 nm.

**CaM-2 synthesis:** The linear decapeptide was assembled on Fmoc-Gly-2-chlorotriylchloride® Tenta gel-resin (0.1 mmol, loading of 0.17 mmol/g) using the general procedure with following sequence: Fmoc-*L*-Pro-OH, Fmoc-*L*-Lys(Dde)-OH, Dde-off, DE-1-BB241 (2 equiv.), Fmoc-*L*-Ala-OH, Fmoc-*L*-Lys(Ac)-OH, Fmoc-Gly-OH, Fmoc-*L*-Pro-OH, Fmoc-*L*-Lys(Dde)-OH, Dde-off, DE-2-BB314 (2 equiv.), Fmoc-*L*-Lys(Boc)-OH, Fmoc-*L*-Ala-OH. The peptide was released from the resin using cleavage solution of TFE/AcOH/DCM (2:1:7). Linear protected peptide was obtained as a white solid powder after precipitation, washing with diethyl ether, dissolved by CH<sub>3</sub>CN/H<sub>2</sub>O (1:1) and lyophilized. The linear decapeptide (5 mM) was dissolved in DMF and the pH was adjusted to 9 by addition of DIPEA. PyBOP (1.0 equiv.) was added and the solution stirred at 25 °C for 1 h. Solvent was removed under reduced pressure and the residue dissolved in CH<sub>3</sub>CN/H<sub>2</sub>O (1:1) and reverse-phase HPLC purification was performed. The desired cyclodecapeptide was recovered as a white powder after lyophilization. To the cyclodecapeptide was added 1 mL H<sub>2</sub>O and 20 mL TFA and the solution stirred at room temperature for 1 hour. Solvent was removed under reduced pressure and the residue dissolved in CH<sub>3</sub>CN/H<sub>2</sub>O (1:1). The desired cyclodecapeptide **CaM-2-amino** was recovered as a white powder after lyophilization. **CaM-2-amino** (0.5 M) was dissolved in DMF and DIPEA was added (5.0 equiv.). FITC (1.2 equiv., TCI) was added and the solution stirred at 25 °C for 1 h. Solvent was removed under reduced pressure and the residue dissolved in CH<sub>3</sub>CN/H<sub>2</sub>O (1:1) and reverse-phase HPLC purification was performed. The desired CaM binder **CaM-2** was recovered as a yellow powder after lyophilization. **HRMS (*m/z*, C<sub>95</sub>H<sub>106</sub>F<sub>6</sub>N<sub>15</sub>O<sub>18</sub>S, ESI):** calculated [M+H]<sup>+</sup>: 1890.7465; found: 1890.7519.

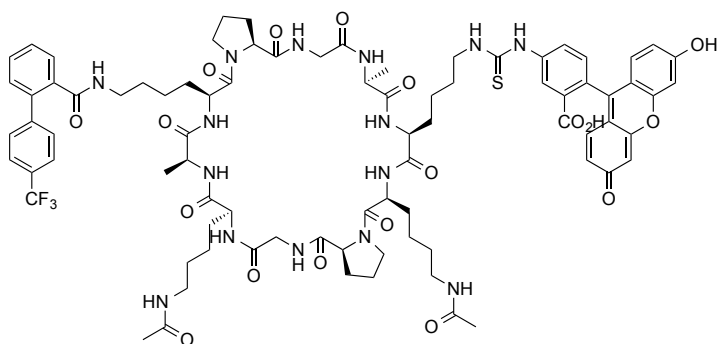

**Supplementary Figure 36 | Structure of the CaM binder CaM-1.**

**CaM-1**(2) PDA Ch2 260nm@4.8nm  
Range: 4e-1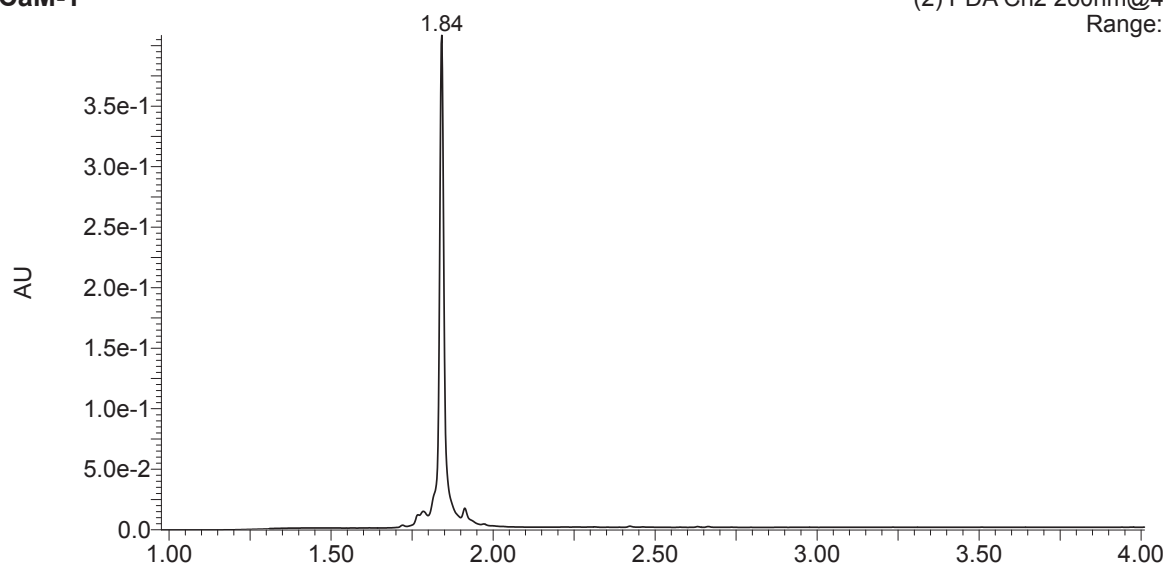

**Supplementary Figure 37 | UPLC chromatograms of CaM-1.** UPLC analyses were performed on a BEH C18 2.1 × 50 mm column at a flow rate of 0.6 mL/min with gradient: 5 % B (0 to 0.5 minutes), 5 % to 100 % B (0.5 to 4 minutes), 100 % B (4 to 6 minutes), (A= 0.1 % formic acid in water, B= CH<sub>3</sub>CN with 0.1 % formic acid), at 40 °C. Detection by absorbance at 260 nm.

**CaM-1 synthesis:** The linear decapeptide was assembled on Fmoc-Gly-2-chlorotriylchloride® Tenta gel-resin (0.1 mmol, loading of 0.17 mmol/g) using the general procedure with following sequence: Fmoc-*L*-Pro-OH, Fmoc-*L*-Lys(Dde)-OH, Dde-off, DE-1-BB241 (2 equiv., SigmaAldrich, Catalog: 346357), Fmoc-*L*-Ala-OH, Fmoc-*L*-Lys(Ac)-OH, Fmoc-Gly-OH, Fmoc-*L*-Pro-OH, Fmoc-*L*-Lys(Ac)-OH, Fmoc-*L*-Lys(Boc)-OH, Fmoc-*L*-Ala-OH. The peptide was released from the resin using cleavage solution of TFE/AcOH/DCM (2:1:7). Linear protected peptide was obtained as a white solid powder after precipitation, washing with diethyl ether, dissolved by CH<sub>3</sub>CN/H<sub>2</sub>O (1:1) and lyophilized. The linear decapeptide (5 mM) was dissolved in DMF and the pH was adjusted to 9 by addition of DIPEA. PyBOP (1.0 equiv.) was added and the solution stirred at 25 °C for 1 h. Solvent was removed under reduced pressure and the residue dissolved in CH<sub>3</sub>CN/H<sub>2</sub>O (1:1) and reverse-phase HPLC purification was performed. The desired cyclodecapeptide was recovered as a white powder after lyophilization. To the cyclodecapeptide was added 1 mL H<sub>2</sub>O and 20 mL TFA and the solution stirred at room temperature for 1 hour. Solvent was removed under reduced pressure and the residue dissolved in CH<sub>3</sub>CN/H<sub>2</sub>O (1:1). The desired cyclodecapeptide **CaM-1-amino** was recovered as a white powder after lyophilization. **CaM-1-amino** (0.5 M) was dissolved in DMF and DIPEA was added (5.0 equiv.). FITC (1.2 equiv., TCI) was added and the solution stirred at 25 °C for 1 h. Solvent was removed under reduced pressure and the residue dissolved in CH<sub>3</sub>CN/H<sub>2</sub>O (1:1) and reverse-phase HPLC purification was performed. The

desired CaM binder **CaM-1** was recovered as a yellow powder after lyophilization. **HRMS ( $m/z$ ,  $C_{83}H_{101}F_3N_{15}O_{18}S$ , ESI):** calculated  $[M+H]^+$ : 1684.7122; found: 1684.7213.

**Fluorescence polarization measurement with CaM binder:** Freshly dissolved fluorescein labeled macrocycles (7.5  $\mu$ L, final concentration 75 nM, final DMSO content adjusted to 1% in DPBS) were incubated at 22  $^{\circ}$ C for 10 min in a black 384-well plate in DPBS (pH 7.4) with increasing concentrations of CaM to a final volume of 15  $\mu$ L. The fluorescence anisotropy was measured on a Spectra Max Paradigm multimode plate reader. Experiments were performed in triplicate and the mean anisotropy values fitted to equation (3) using KaleidaGraph 4.1.3.

**(d) Affinity determination of PSA binders by fluorescence polarization measurements.**

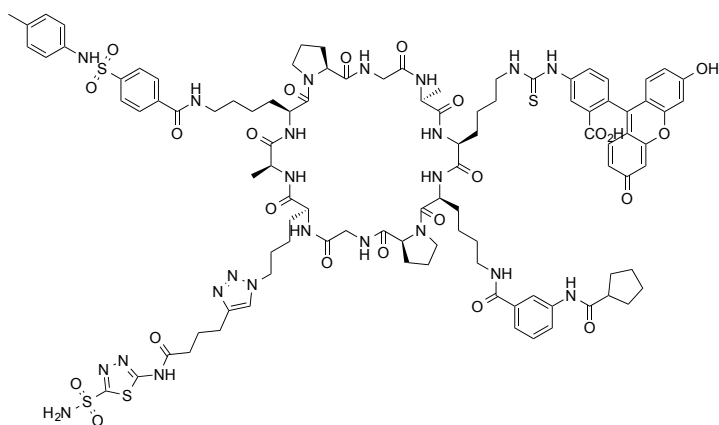

**Supplementary Figure 38 | Structure of the PSA binder PSA-1.**

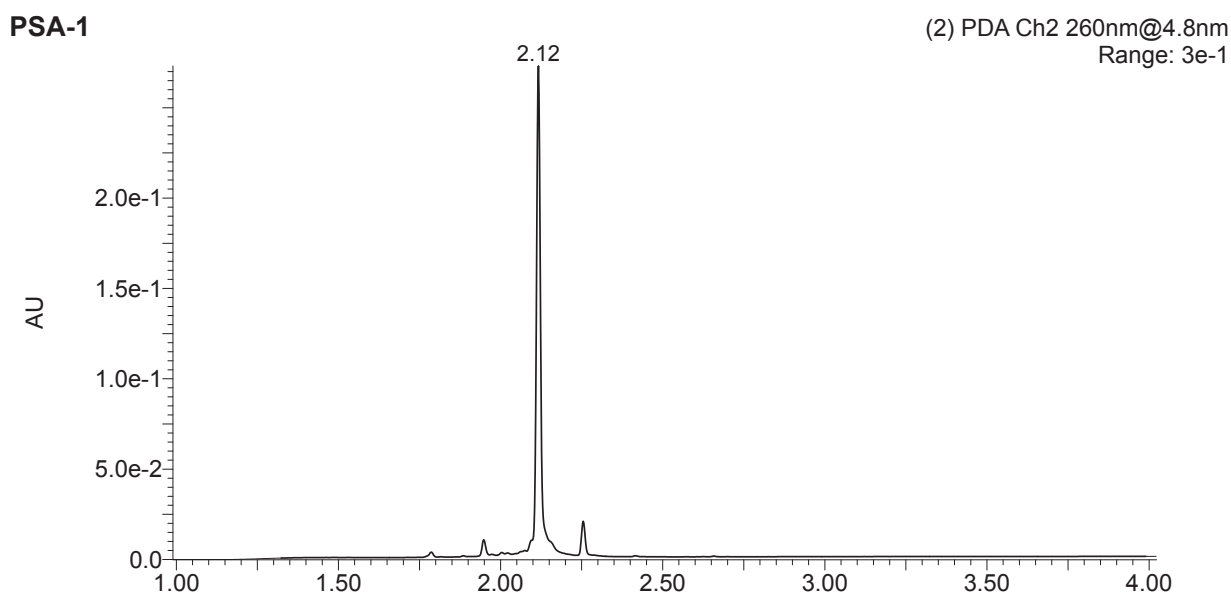

**Supplementary Figure 39 | UPLC chromatogram of PSA-1.** UPLC analyses were performed on a BEH C18 2.1  $\times$  50 mm column at a flow rate of 0.6 mL/min with gradient: 5 % B (0 to 0.5 minutes), 5 % to 100 % B (0.5 to 4 minutes), 100 % B (4 to 6 minutes), (A= 0.1 %

formic acid in water, B= CH<sub>3</sub>CN with 0.1 % formic acid), at 40 °C. Detection by absorbance at 260 nm.

**PSA-1 synthesis:** The linear decapeptide was assembled on Fmoc-Gly-2-chlorotriylchloride® Tenta gel-resin (0.1 mmol, loading of 0.17 mmol/g) using the general procedure with following sequence: Fmoc-*L*-Pro-OH, Fmoc-*L*-Lys(Dde)-OH, Dde-off, DE-1-BB205 (2 equiv., Enamine, Catalog: EN300-00311), Fmoc-*L*-Ala-OH, Fmoc-*L*-Lys(N<sub>3</sub>)-OH, DE-3-BB17 (2 equiv., *N*-(5-sulfamoyl-1,3,4-thiadiazol-2-yl)hex-5-ynamide<sup>10</sup>); CuI, 10 %; TBTA, 10 % in 6 mL of THF : DCM = 4 : 1 overnight at 25 °C), Fmoc-Gly-OH, Fmoc-*L*-Pro-OH, Fmoc-*L*-Lys(Dde)-OH, Dde-off, DE-2-BB182 (2 equiv., ChemBridge, Catalog: 9071750), Fmoc-*L*-Lys(Boc)-OH, Fmoc-*L*-Ala-OH. The peptide was released from the resin using cleavage solution of TFE/AcOH/DCM (2:1:7). Linear protected peptide was obtained as a white solid powder after precipitation, washing with diethyl ether, dissolved by CH<sub>3</sub>CN/H<sub>2</sub>O (1:1) and lyophilized. The linear decapeptide (5 mM) was dissolved in DMF and the pH was adjusted to 9 by addition of DIPEA. PyBOP (1.0 equiv.) was added and the solution stirred at 25 °C for 1 h. Solvent was removed under reduced pressure and the residue dissolved in CH<sub>3</sub>CN/H<sub>2</sub>O (1:1) and reverse-phase HPLC purification was performed. The desired cyclodecapeptide was recovered as a white powder after lyophilization. To the cyclodecapeptide was added 1 mL H<sub>2</sub>O and 20 mL TFA and the solution stirred at room temperature for 1 hour. Solvent was removed under reduced pressure and the residue dissolved in CH<sub>3</sub>CN/H<sub>2</sub>O (1:1). The desired cyclodecapeptide **PSA-1-amino** was recovered as a white powder after lyophilization. **PSA-1-amino** (0.5 M) was dissolved in DMF and DIPEA was added (5.0 equiv.). FITC (1.2 equiv.) was added and the solution stirred at 25 °C for 1 h. Solvent was removed under reduced pressure and the residue dissolved in CH<sub>3</sub>CN/H<sub>2</sub>O (1:1) and reverse-phase HPLC purification was performed. The desired PSA binder **PSA-1** was recovered as a yellow powder after lyophilization. **HRMS (*m/z*, C<sub>100</sub>H<sub>122</sub>N<sub>23</sub>O<sub>23</sub>S<sub>4</sub>, ESI):** calculated [M+H]<sup>+</sup>: 2140.7967; found: 2140.7993.

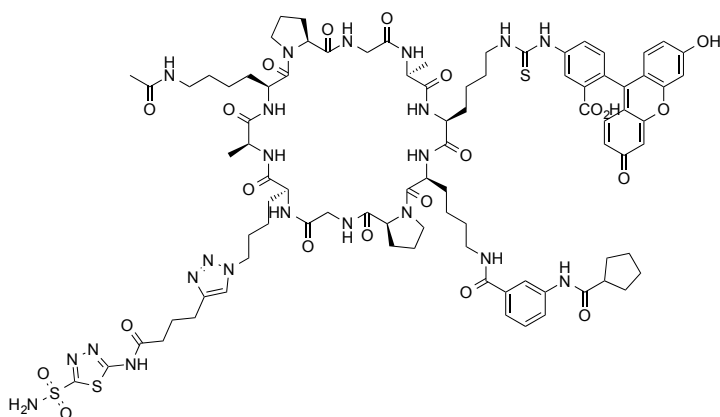

**Supplementary Figure 40 | Structure of the PSA binder PSA-2.**

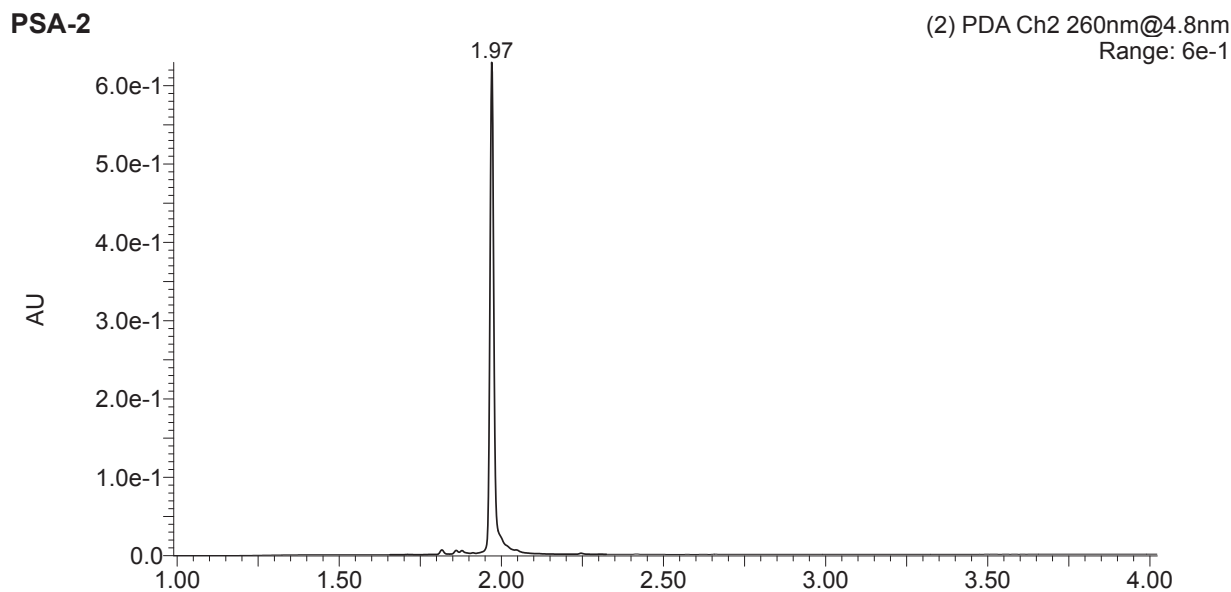

**Supplementary Figure 41 | UPLC chromatogram of PSA-2.** UPLC analyses were performed on a BEH C18 2.1 × 50 mm column at a flow rate of 0.6 mL/min with gradient: 5 % B (0 to 0.5 minutes), 5 % to 100 % B (0.5 to 4 minutes), 100 % B (4 to 6 minutes), (A= 0.1 % formic acid in water, B= CH<sub>3</sub>CN with 0.1 % formic acid), at 40 °C. Detection by absorbance at 260 nm.

**PSA-2 synthesis:** The linear decapeptide was assembled on Fmoc-Gly-2-chlorotriylchloride® Tenta gel-resin (0.1 mmol, loading of 0.17 mmol/g) using the general procedure with following sequence: Fmoc-*L*-Pro-OH, Fmoc-*L*-Lys(Ac)-OH, Fmoc-*L*-Ala-OH, Fmoc-*L*-Lys(N<sub>3</sub>)-OH, DE-3-BB17 (2 equiv., *N*-(5-sulfamoyl-1,3,4-thiadiazol-2-yl)hex-5-ynamide); CuI, 10 %; TBTA, 10 % in 6 mL of THF : DCM = 4 : 1 overnight at 25 °C), Fmoc-Gly-OH, Fmoc-*L*-Pro-OH, Fmoc-*L*-Lys(Dde)-OH, Dde-off, DE-2-BB182 (2 equiv.), Fmoc-*L*-Lys(Boc)-OH, Fmoc-*L*-Ala-OH. The peptide was released from the resin using cleavage solution of TFE/AcOH/DCM (2:1:7). Linear protected peptide was obtained as a white solid powder after precipitation, washing with diethyl ether, dissolved by CH<sub>3</sub>CN/H<sub>2</sub>O (1:1) and lyophilized. The linear decapeptide (5 mM) was dissolved in DMF and the pH was adjusted to 9 by addition of DIPEA. PyBOP (1.0 equiv.) was added and the solution stirred at 25 °C for 1 h. Solvent was removed under reduced pressure and the residue dissolved in CH<sub>3</sub>CN/H<sub>2</sub>O (1:1) and reverse-phase HPLC purification was performed. The desired cyclodecapeptide was recovered as a white powder after lyophilization. To the cyclodecapeptide was added 1 mL H<sub>2</sub>O and 20 mL TFA and the solution stirred at room temperature for 1 hour. Solvent was removed under reduced pressure and the residue dissolved in CH<sub>3</sub>CN/H<sub>2</sub>O (1:1). The desired cyclodecapeptide **PSA-2-amino** was recovered as a white powder after lyophilization. **PSA-2-amino** (0.5 M) was dissolved in DMF and DIPEA was added (5.0 equiv.). FITC (1.2 equiv.) was added and the solution stirred at 25 °C for 1 h. Solvent was removed under reduced pressure and the residue dissolved in CH<sub>3</sub>CN/H<sub>2</sub>O (1:1) and reverse-phase HPLC purification was performed. The desired PSA

binder **PSA-2** was recovered as a yellow powder after lyophilization. **HRMS** ( $m/z$ ,  $C_{88}H_{113}N_{22}O_{21}S_3$ , **ESI**): calculated  $[M+H]^+$ : 1909.7613; found: 1909.7715.

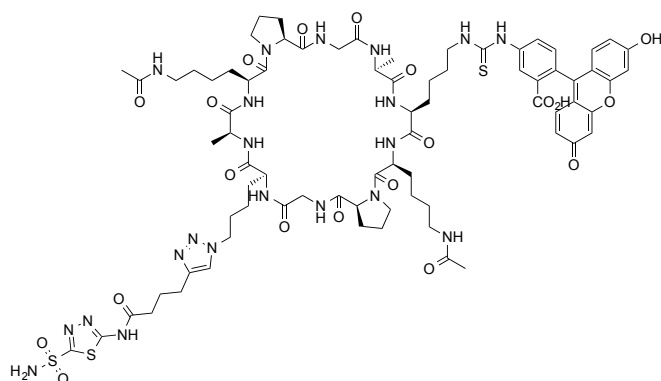

**Supplementary Figure 42 | Structure of the PSA binder PSA-3.**

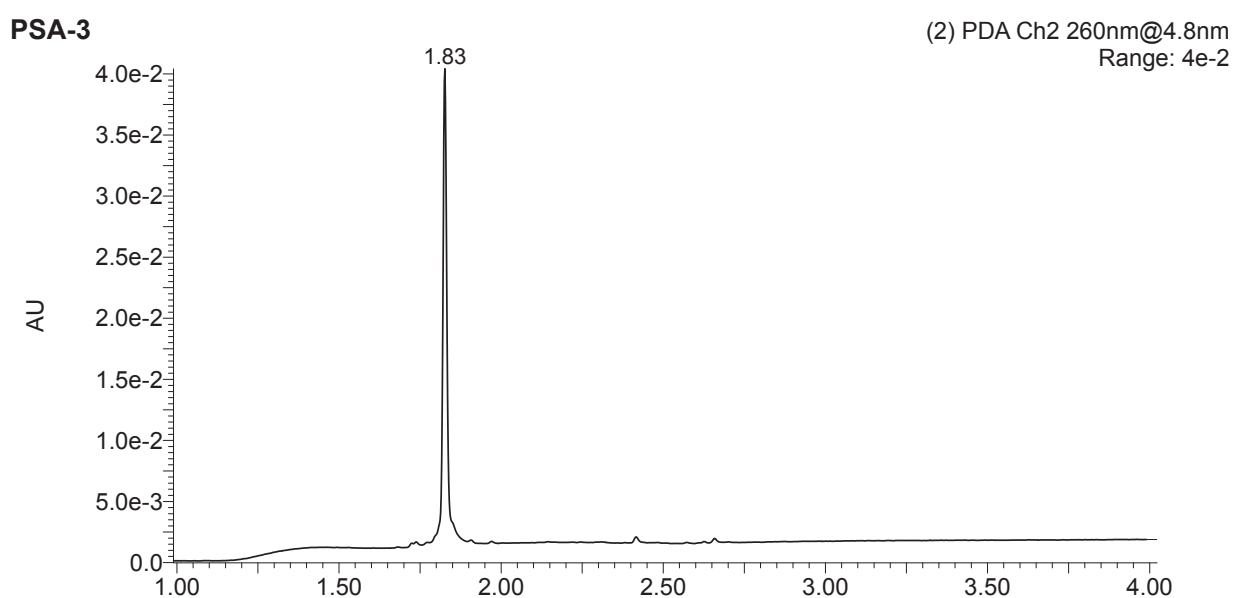

**Supplementary Figure 43 | UPLC chromatogram of PSA-3.** UPLC analyses were performed on a BEH C18 2.1 × 50 mm column at a flow rate of 0.6 mL/min with gradient: 5 % B (0 to 0.5 minutes), 5 % to 100 % B (0.5 to 4 minutes), 100 % B (4 to 6 minutes), (A= 0.1 % formic acid in water, B= CH<sub>3</sub>CN with 0.1 % formic acid), at 40 °C. Detection by absorbance at 260 nm.

**PSA-3 synthesis:** The linear decapeptide was assembled on Fmoc-Gly-2-chlorotrylchloride® Tenta gel-resin (0.1 mmol, loading of 0.17 mmol/g) using the general procedure with following sequence: Fmoc-*L*-Pro-OH, Fmoc-*L*-Lys(Ac)-OH, Fmoc-*L*-Ala-OH, Fmoc-*L*-Lys(N<sub>3</sub>)-OH, DE-3-BB17 (2 equiv., *N*-(5-sulfamoyl-1,3,4-thiadiazol-2-yl)hex-5-ynamide); CuI, 10 %; TBTA, 10 % in 6 mL of THF : DCM = 4 : 1 overnight at 25 °C), Fmoc-Gly-OH, Fmoc-*L*-Pro-OH, Fmoc-*L*-Lys(Ac)-OH, Fmoc-*L*-Lys(Boc)-OH, Fmoc-*L*-Ala-OH. The peptide was released from the resin using cleavage solution of TFE/AcOH/DCM (2:1:7). Linear protected peptide was obtained as a white solid powder after precipitation, washing with diethyl ether, dissolved

by CH<sub>3</sub>CN/H<sub>2</sub>O (1:1) and lyophilized. The linear decapeptide (5 mM) was dissolved in DMF and the pH was adjusted to 9 by addition of DIPEA. PyBOP (1.0 equiv.) was added and the solution stirred at 25 °C for 1 h. Solvent was removed under reduced pressure and the residue dissolved in CH<sub>3</sub>CN/H<sub>2</sub>O (1:1) and reverse-phase HPLC purification was performed. The desired cyclodecapeptide was recovered as a white powder after lyophilization. To the cyclodecapeptide was added 1 mL H<sub>2</sub>O and 20 mL TFA and the solution stirred at room temperature for 1 hour. Solvent was removed under reduced pressure and the residue dissolved in CH<sub>3</sub>CN/H<sub>2</sub>O (1:1). The desired cyclodecapeptide **PSA-3-amino** was recovered as a white powder after lyophilization. **PSA-3-amino** (0.5 M) was dissolved in DMF and DIPEA was added (5.0 equiv.). FITC (1.2 equiv.) was added and the solution stirred at 25 °C for 1 h. Solvent was removed under reduced pressure and the residue dissolved in CH<sub>3</sub>CN/H<sub>2</sub>O (1:1) and reverse-phase HPLC purification was performed. The desired PSA binder **PSA-3** was recovered as a yellow powder after lyophilization. **HRMS (*m/z*, C<sub>77</sub>H<sub>102</sub>N<sub>21</sub>O<sub>20</sub>S<sub>3</sub>, ESI)**: calculated [M+H]<sup>+</sup>: 1736.6772; found: 1736.6813.

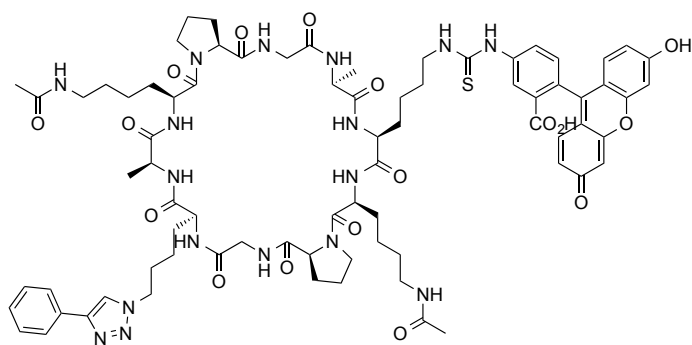

**Supplementary Figure 44 | Structure of the scaffold control SC-2.**

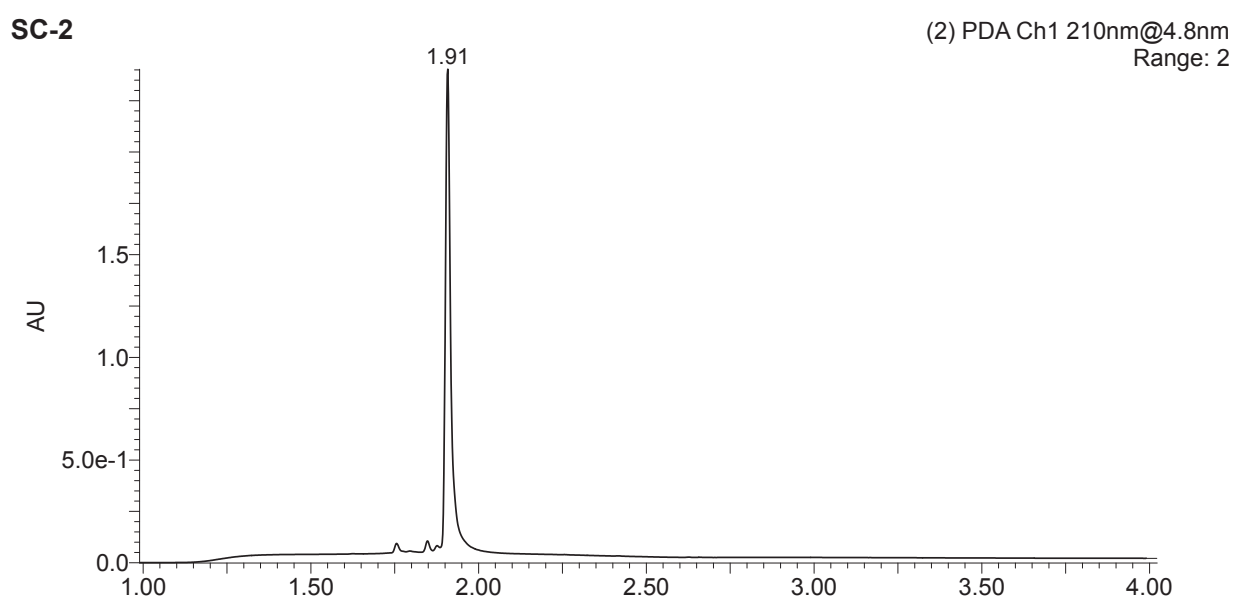

**Supplementary Figure 45 | UPLC chromatograms of SC-2.** UPLC analyses were performed on a BEH C18 2.1 × 50 mm column at a flow





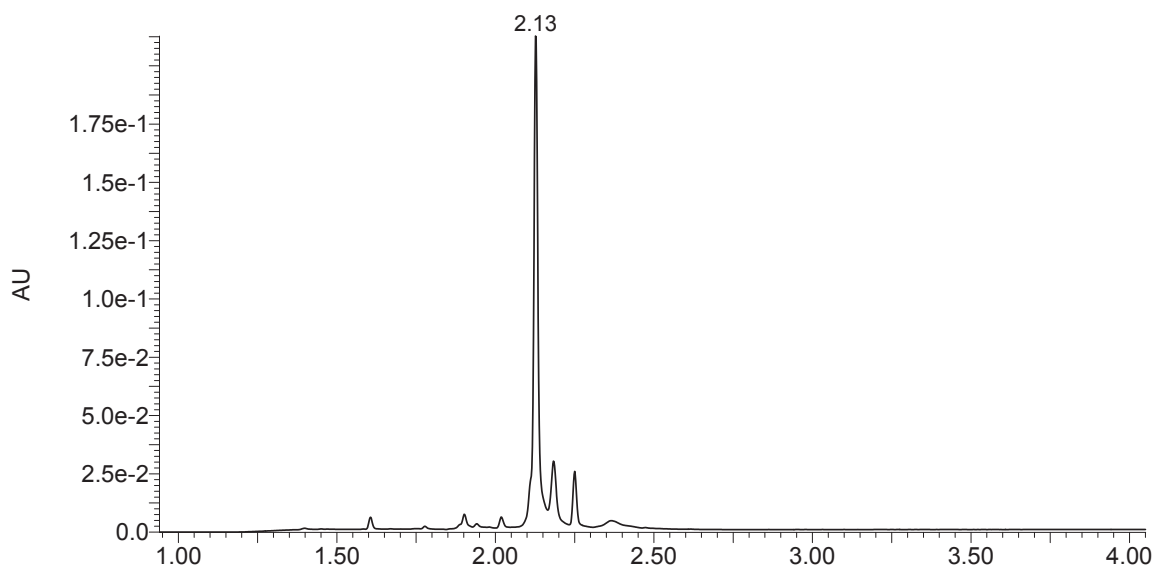

**Supplementary Figure 47 | UPLC chromatogram of D-PSA-1.** UPLC analyses were performed on a BEH C18 2.1 × 50 mm column at a flow rate of 0.6 mL/min with gradient: 5 % B (0 to 0.5 minutes), 5 % to 100 % B (0.5 to 4 minutes), 100 % B (4 to 6 minutes), (A= 0.1 % formic acid in water, B= CH<sub>3</sub>CN with 0.1 % formic acid), at 40 °C. Detection by absorbance at 260 nm.

**D-PSA-1 synthesis:** The linear decapeptide was assembled on Fmoc-Gly-2-chlorotriylchloride® Tenta gel-resin (0.1 mmol, loading of 0.17 mmol/g) using the general procedure with following sequence: Fmoc-*D*-Pro-OH (2 equiv., SigmaAldrich, Catalog: 47532), Fmoc-*L*-Lys(Dde)-OH, Dde-off, DE-1-BB205, Fmoc-*L*-Ala-OH, Fmoc-*L*-Lys(N<sub>3</sub>)-OH, DE-3-BB17; CuI, 10 %; TBTA, 10 % in 6 mL of THF : DCM = 4 : 1 overnight at 25 °C), Fmoc-Gly-OH, Fmoc-*D*-Pro-OH, Fmoc-*L*-Lys(Dde)-OH, Dde-off, DE-2-BB182, Fmoc-*L*-Lys(Boc)-OH, Fmoc-*L*-Ala-OH. The peptide was released from the resin using cleavage solution of TFE/AcOH/DCM (2:1:7). Linear protected peptide was obtained as a white solid powder after precipitation, washing with diethyl ether, dissolved by CH<sub>3</sub>CN/H<sub>2</sub>O (1:1) and lyophilized. The linear decapeptide (5 mM) was dissolved in DMF and the pH was adjusted to 9 by addition of DIPEA. PyBOP (1.0 equiv.) was added and the solution stirred at 25 °C for 1 h. Solvent was removed under reduced pressure and the residue dissolved in CH<sub>3</sub>CN/H<sub>2</sub>O (1:1) and reverse-phase HPLC purification was performed. The desired cyclodecapeptide was recovered as a white powder after lyophilization. To the cyclodecapeptide was added 1 mL H<sub>2</sub>O and 20 mL TFA and the solution stirred at room temperature for 1 hour. Solvent was removed under reduced pressure and the residue dissolved in CH<sub>3</sub>CN/H<sub>2</sub>O (1:1). The desired cyclodecapeptide **D-PSA-1-**

**amino** was recovered as a white powder after lyophilization. **D-PSA-1-amino** (0.5 M) was dissolved in DMF and DIPEA was added (5.0 equiv.). FITC (1.2 equiv.) was added and the solution stirred at 25 °C for 1 h. Solvent was removed under reduced pressure and the residue dissolved in CH<sub>3</sub>CN/H<sub>2</sub>O (1:1) and reverse-phase HPLC purification was performed. The desired PSA binder **D-PSA-1** was recovered as a yellow powder after lyophilization. **HRMS (m/z, C<sub>100</sub>H<sub>122</sub>N<sub>23</sub>O<sub>23</sub>S<sub>4</sub>, ESI):** calculated [M+H]<sup>+</sup>: 2140.7967; found: 2140.7910.

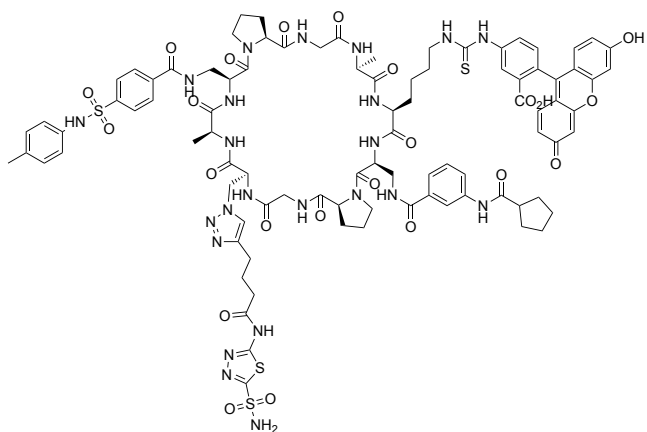

**Supplementary Figure 48 | Structure of the PSA binder DAP-PSA-1.**

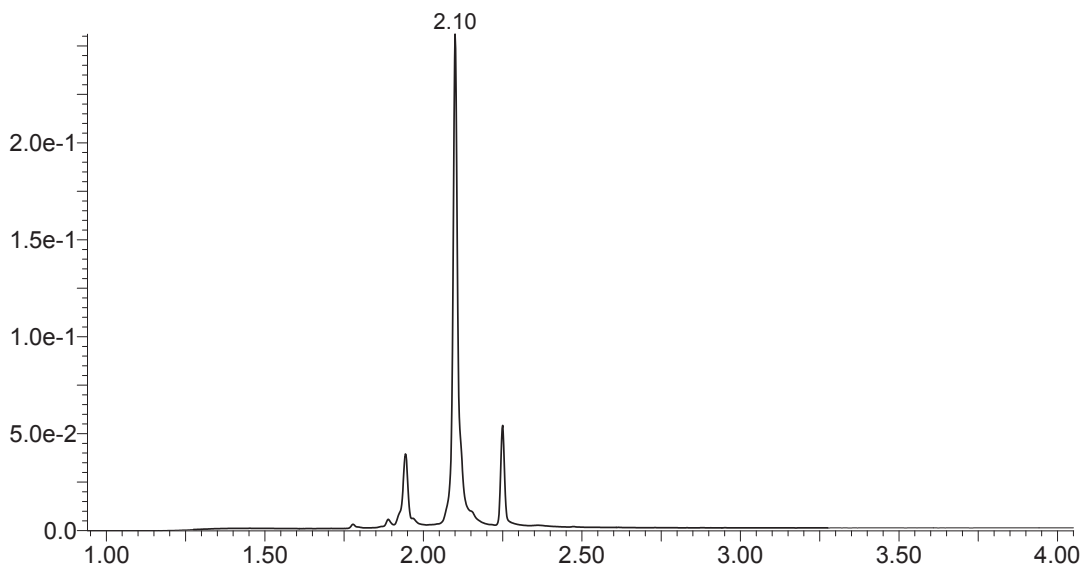

**Supplementary Figure 49 | UPLC chromatogram of DAP-PSA-1.** UPLC analyses were performed on a BEH C18 2.1 × 50 mm column at a flow rate of 0.6 mL/min with gradient: 5 % B (0 to 0.5 minutes), 5 % to 100 % B (0.5 to 4 minutes), 100 % B (4 to 6 minutes), (A= 0.1 % formic acid in water, B= CH<sub>3</sub>CN with 0.1 % formic acid), at 40 °C. Detection by absorbance at 260 nm.

**DAP-PSA-1 synthesis:** The linear decapeptide was assembled on Fmoc-Gly-2-chlorotriethylchloride® Tenta gel-resin (0.1 mmol, loading of 0.17 mmol/g) using the general procedure with following sequence: Fmoc-*L*-Pro-OH, Fmoc-*L*-Dap(Dde)-OH



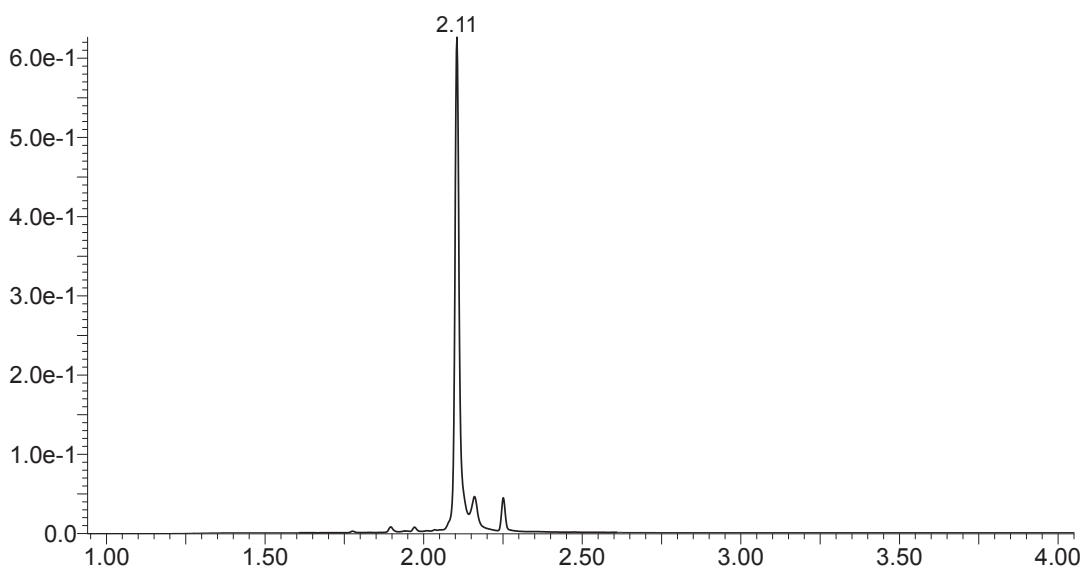

**Supplementary Figure 51 | UPLC chromatogram of DAB-PSA-1.** UPLC analyses were performed on a BEH C18 2.1 × 50 mm column at a flow rate of 0.6 mL/min with gradient: 5 % B (0 to 0.5 minutes), 5 % to 100 % B (0.5 to 4 minutes), 100 % B (4 to 6 minutes), (A= 0.1 % formic acid in water, B= CH<sub>3</sub>CN with 0.1 % formic acid), at 40 °C. Detection by absorbance at 260 nm.

**DAB-PSA-1 synthesis:** The linear decapeptide was assembled on Fmoc-Gly-2-chlorotriylchloride® Tenta gel-resin (0.1 mmol, loading of 0.17 mmol/g) using the general procedure with following sequence: Fmoc-*L*-Pro-OH, Fmoc-*L*-Dab(Dde)-OH (2 equiv., Iris, Catalog: FAA1365), Dde-off, DE-1-BB205, Fmoc-*L*-Ala-OH, Fmoc-*L*-Dab(N<sub>3</sub>)-OH(2 equiv., Iris, Catalog: FAA6620), DE-3-BB17; CuI, 10 %; TBTA, 10 % in 6 mL of THF : DCM = 4 : 1 overnight at 25 °C), Fmoc-Gly-OH, Fmoc-*L*-Pro-OH, Fmoc-*L*-Dab(Dde)-OH, Dde-off, DE-2-BB182, Fmoc-*L*-Lys(Boc)-OH, Fmoc-*L*-Ala-OH. The peptide was released from the resin using cleavage solution of TFE/AcOH/DCM (2:1:7). Linear protected peptide was obtained as a white solid powder after precipitation, washing with diethyl ether, dissolved by CH<sub>3</sub>CN/H<sub>2</sub>O (1:1) and lyophilized. The linear decapeptide (5 mM) was dissolved in DMF and the pH was adjusted to 9 by addition of DIPEA. PyBOP (1.0 equiv.) was added and the solution stirred at 25 °C for 1 h. Solvent was removed under reduced pressure and the residue dissolved in CH<sub>3</sub>CN/H<sub>2</sub>O (1:1) and reverse-phase HPLC purification was performed. The desired cyclodecapeptide was recovered as a white powder after lyophilization. To the cyclodecapeptide was added 1 mL H<sub>2</sub>O and 20 mL TFA and the solution stirred at room temperature for 1 hour. Solvent was removed under reduced pressure and the residue dissolved in CH<sub>3</sub>CN/H<sub>2</sub>O (1:1). The desired cyclodecapeptide **DAB-PSA-1-amino** was recovered as a white powder after lyophilization. **DAB-PSA-1-amino** (0.5 M) was dissolved in DMF and DIPEA was added (5.0 equiv.). FITC (1.2 equiv.) was added and the solution stirred at 25 °C for 1 h. Solvent was removed under reduced pressure and the residue dissolved in CH<sub>3</sub>CN/H<sub>2</sub>O (1:1) and reverse-phase HPLC

purification was performed. The desired PSA binder **DAB-PSA-1** was recovered as a yellow powder after lyophilization.

**HRMS (m/z, C<sub>94</sub>H<sub>110</sub>N<sub>23</sub>O<sub>23</sub>S<sub>4</sub>, ESI):** calculated [M+H]<sup>+</sup>: 2056.7028; found: 2056.7057.

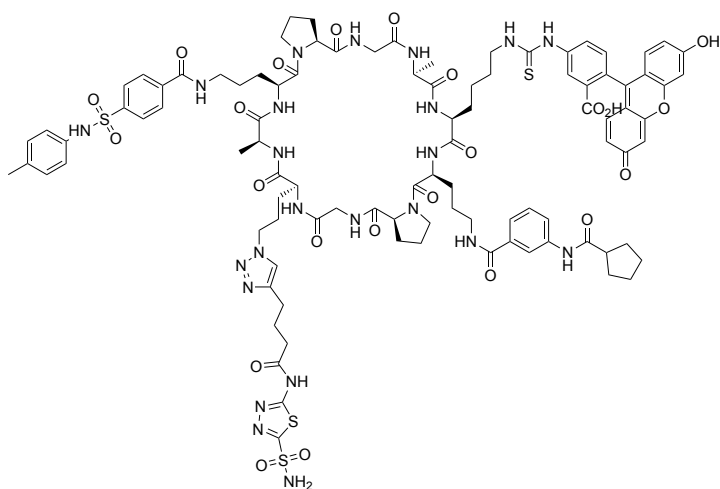

**Supplementary Figure 52 | Structure of the PSA binder ORN-PSA-1.**

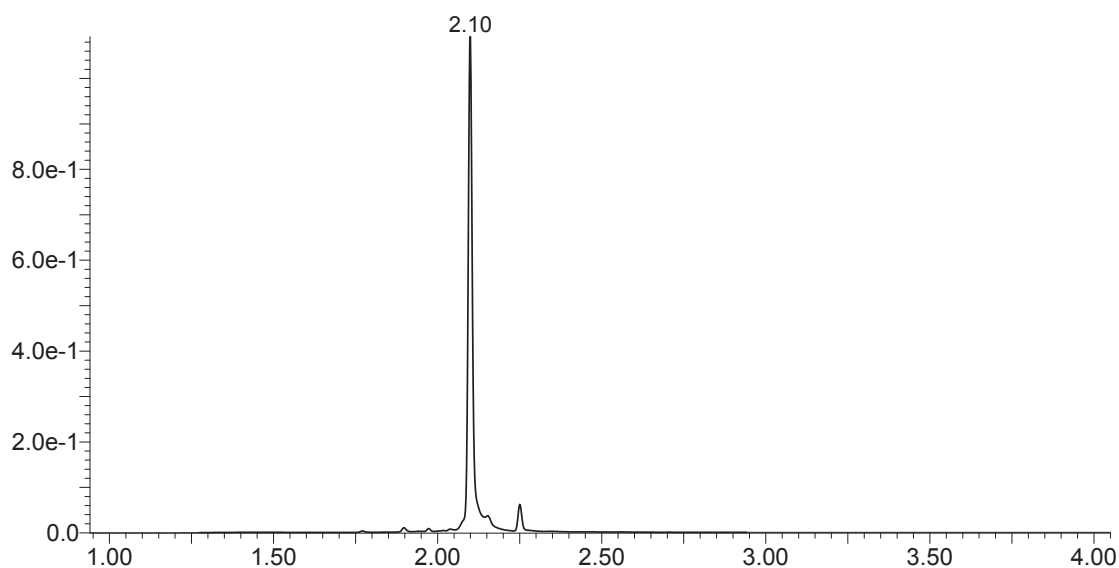

**Supplementary Figure 53 | UPLC chromatogram of ORN-PSA-1.** UPLC analyses were performed on a BEH C18 2.1 × 50 mm column at a flow rate of 0.6 mL/min with gradient: 5 % B (0 to 0.5 minutes), 5 % to 100 % B (0.5 to 4 minutes), 100 % B (4 to 6 minutes), (A= 0.1 % formic acid in water, B= CH<sub>3</sub>CN with 0.1 % formic acid), at 40 °C. Detection by absorbance at 260 nm.

**ORN-PSA-1 synthesis:** The linear decapeptide was assembled on Fmoc-Gly-2-chlorotrylchloride® Tenta gel-resin (0.1 mmol, loading of 0.17 mmol/g) using the general procedure with following sequence: Fmoc-*L*-Pro-OH, Fmoc-*L*-Orn(Dde)-OH (2 equiv., Iris, Catalog: FAA1365), Dde-off, DE-1-BB205, Fmoc-*L*-Ala-OH, Fmoc-*L*-Orn(N<sub>3</sub>)-OH(2 equiv., Iris, Catalog: FAA6620), DE-3-BB17; CuI, 10 %; TBTA, 10 % in 6 mL of THF : DCM = 4 : 1 overnight at 25 °C), Fmoc-Gly-OH, Fmoc-

*L*-Pro-OH, Fmoc-*L*-Orn(Dde)-OH, Dde-off, DE-2-BB182, Fmoc-*L*-Lys(Boc)-OH, Fmoc-*L*-Ala-OH. The peptide was released from the resin using cleavage solution of TFE/AcOH/DCM (2:1:7). Linear protected peptide was obtained as a white solid powder after precipitation, washing with diethyl ether, dissolved by CH<sub>3</sub>CN/H<sub>2</sub>O (1:1) and lyophilized. The linear decapeptide (5 mM) was dissolved in DMF and the pH was adjusted to 9 by addition of DIPEA. PyBOP (1.0 equiv.) was added and the solution stirred at 25 °C for 1 h. Solvent was removed under reduced pressure and the residue dissolved in CH<sub>3</sub>CN/H<sub>2</sub>O (1:1) and reverse-phase HPLC purification was performed. The desired cyclodecapeptide was recovered as a white powder after lyophilization. To the cyclodecapeptide was added 1 mL H<sub>2</sub>O and 20 mL TFA and the solution stirred at room temperature for 1 hour. Solvent was removed under reduced pressure and the residue dissolved in CH<sub>3</sub>CN/H<sub>2</sub>O (1:1). The desired cyclodecapeptide **ORN-PSA-1-amino** was recovered as a white powder after lyophilization. **ORN-PSA-1-amino** (0.5 M) was dissolved in DMF and DIPEA was added (5.0 equiv.). FITC (1.2 equiv.) was added and the solution stirred at 25 °C for 1 h. Solvent was removed under reduced pressure and the residue dissolved in CH<sub>3</sub>CN/H<sub>2</sub>O (1:1) and reverse-phase HPLC purification was performed. The desired PSA binder **ORN-PSA-1** was recovered as a yellow powder after lyophilization.

**HRMS (m/z, C<sub>97</sub>H<sub>116</sub>N<sub>23</sub>O<sub>23</sub>S<sub>4</sub>, ESI):** calculated [M+H]<sup>+</sup>: 2098.7497; found: 2098.7439.

**Fluorescence polarization measurement with PSA binder:** Freshly dissolved fluorescein labeled macrocycles (5 μL, final concentration 50 nM, final DMSO content adjusted to 1% in PBS) were incubated at 22 °C for 10 min in a black 384-well plate in PBS (pH 7.4) with increasing concentrations of PSA to a final volume of 10 μL. The fluorescence anisotropy was measured on a Spectra Max Paradigm multimode plate reader. Experiments were performed in triplicate and the mean anisotropy values fitted to equation (3) using KaleidaGraph 4.1.3.

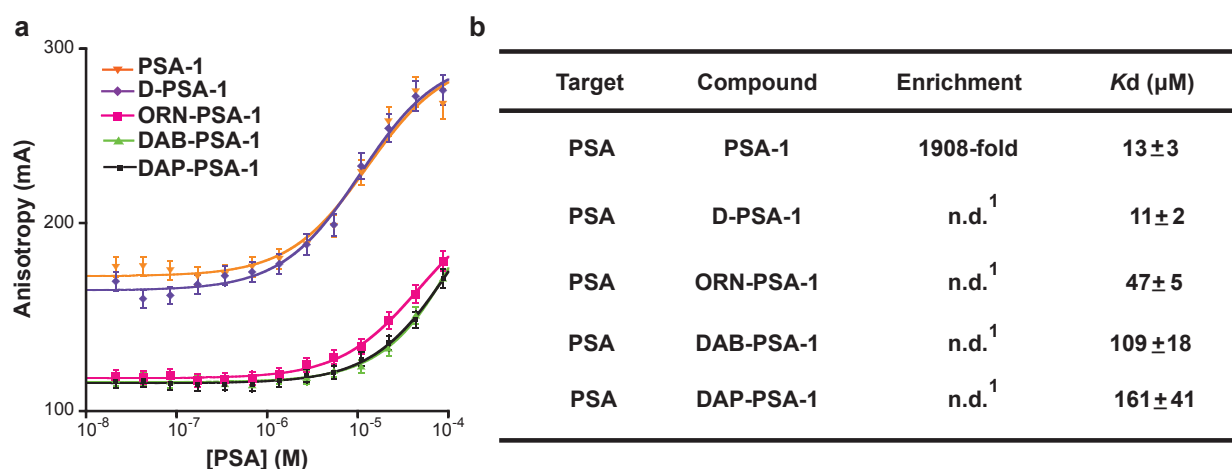

**Supplementary Figure 54 | Binder validation of selected cyclic peptides against PSA.** a, fluorescence polarization measurements of

selected fluorescently-labeled synthetic cyclic peptides against PSA. Error bars indicate the standard deviation of three measurements. **b**, Enrichments and dissociation constants of synthesized cyclic peptides, chemical structures and corresponding identification numbers (**ID**) of the three diversity elements. For calculation of enrichment see Supplementary Table 7. **n.d.** = not determined.<sup>1</sup> = not included in the library.

**(e) Affinity determination of L19-TNF binders by fluorescence polarization measurement.**

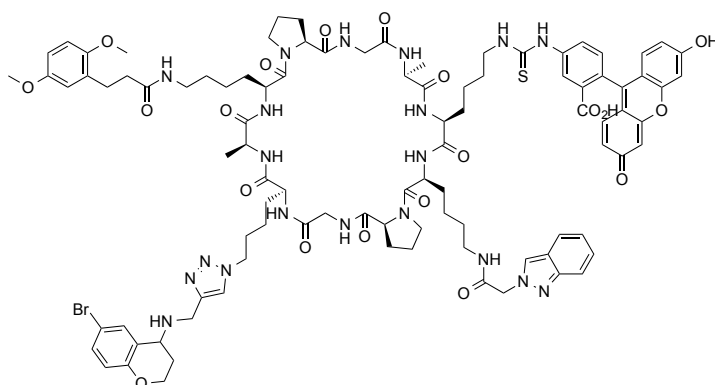

**Supplementary Figure 55 | Structure of the L19-TNF binder TNF-1.**

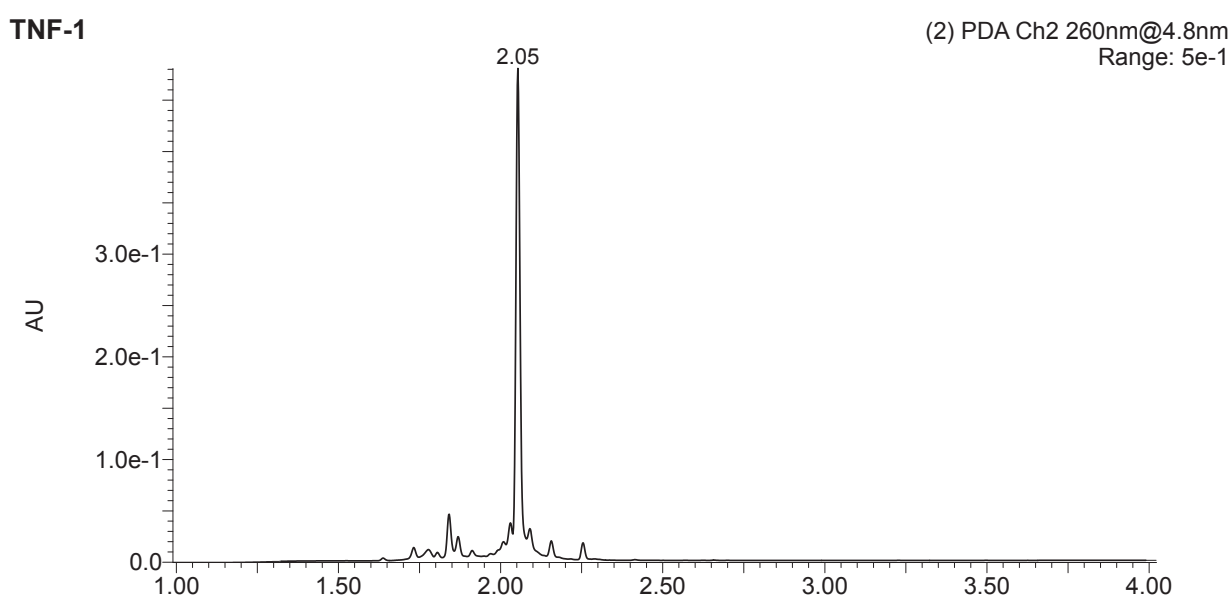

**Supplementary Figure 56 | UPLC chromatogram of TNF-1.** UPLC analyses were performed on a BEH C18 2.1 × 50 mm column at a flow rate of 0.6 mL/min with gradient: 5 % B (0 to 0.5 minutes), 5 % to 100 % B (0.5 to 4 minutes), 100 % B (4 to 6 minutes), (A= 0.1 % formic acid in water, B= CH<sub>3</sub>CN with 0.1 % formic acid), at 40 °C. Detection by absorbance at 260 nm.

**TNF-1 synthesis:** The linear decapeptide was assembled on Fmoc-Gly-2-chlorotrylchloride® Tenta gel-resin (0.1 mmol, loading of 0.17 mmol/g) using the general procedure with following sequence: Fmoc-*L*-Pro-OH, Fmoc-*L*-Lys(Dde)-OH, Dde-off, DE-1-BB20 (2 equiv., SigmaAldrich, Catalog: 575658), Fmoc-*L*-Ala-OH, Fmoc-*L*-Lys(N<sub>3</sub>)-OH, DE-3-BB106 (2 equiv.,



Enamine, Catalog: EN300-75317); CuI, 10 %; TBTA, 10 % in 6 mL of THF : DCM = 4 : 1 overnight at 25 °C), Fmoc-Gly-OH, Fmoc-L-Pro-OH, Fmoc-L-Lys(Dde)-OH, Dde-off, DE-2-BB361 (2 equiv., Enamine, Catalog: EN300-71681), Fmoc-L-Lys(Boc)-OH, Fmoc-L-Ala-OH. The peptide was released from the resin using cleavage solution of TFE/AcOH/DCM (2:1:7). Linear protected peptide was obtained as a white solid powder after precipitation, washing with diethyl ether, dissolved by CH<sub>3</sub>CN/H<sub>2</sub>O (1:1) and lyophilized. The linear decapeptide (5 mM) was dissolved in DMF and the pH was adjusted to 9 by addition of DIPEA. PyBOP (1.0 equiv.) was added and the solution stirred at 25 °C for 1 h. Solvent was removed under reduced pressure and the residue dissolved in CH<sub>3</sub>CN/H<sub>2</sub>O (1:1) and reverse-phase HPLC purification was performed. The desired cyclodecapeptide was recovered as a white powder after lyophilization. To the cyclodecapeptide was added 1 mL H<sub>2</sub>O and 20 mL TFA and the solution stirred at room temperature for 1 hour. Solvent was removed under reduced pressure and the residue dissolved in CH<sub>3</sub>CN/H<sub>2</sub>O (1:1). The desired cyclodecapeptide **TNF-1-amino** was recovered as a white powder after lyophilization. **TNF-1-amino** (0.5 M) was dissolved in DMF and DIPEA was added (5.0 equiv.). FITC (1.2 equiv.) was added and the solution stirred at 25 °C for 1 h. Solvent was removed under reduced pressure and the residue dissolved in CH<sub>3</sub>CN/H<sub>2</sub>O (1:1) and reverse-phase HPLC purification was performed. The desired L19-TNF binder **TNF-1** was recovered as a yellow powder after lyophilization. **HRMS (m/z, C<sub>97</sub>H<sub>118</sub>BrN<sub>20</sub>O<sub>20</sub>S, ESI):** calculated [M+H]<sup>+</sup>: 1993.7735; found: 1993.7762.

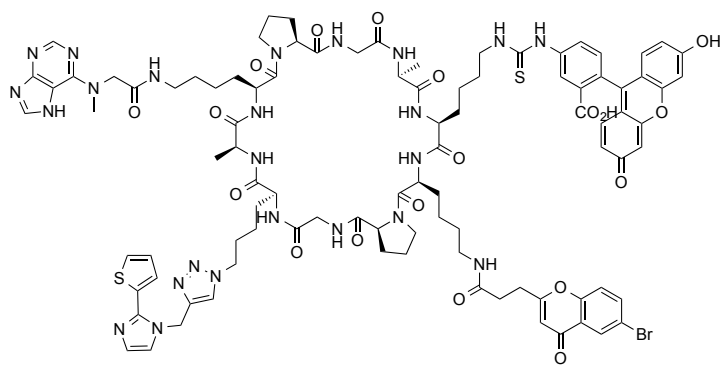

**Supplementary Figure 57 | Structure of the L19-TNF binder TNF-2.**

**TNF-2**(2) PDA Ch2 260nm@4.8nm  
Range: 2e-1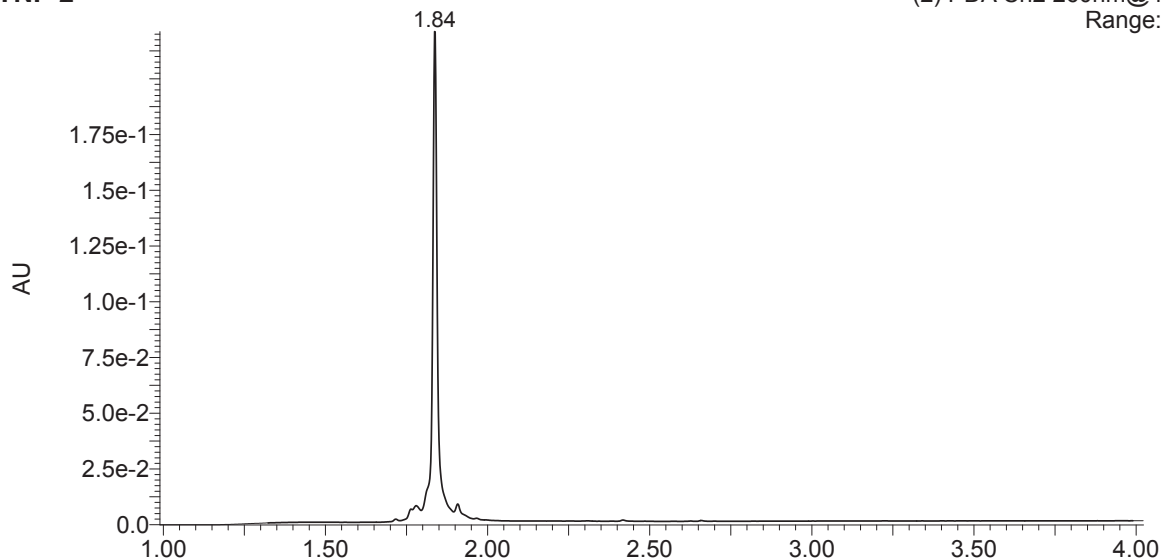

**Supplementary Figure 58 | UPLC chromatogram of TNF-2.** UPLC analyses were performed on a BEH C18 2.1 × 50 mm column at a flow rate of 0.6 mL/min with gradient: 5 % B (0 to 0.5 minutes), 5 % to 100 % B (0.5 to 4 minutes), 100 % B (4 to 6 minutes), (A= 0.1 % formic acid in water, B= CH<sub>3</sub>CN with 0.1 % formic acid), at 40 °C. Detection by absorbance at 260 nm.

**TNF-2 synthesis:** The linear decapeptide was assembled on Fmoc-Gly-2-chlorotriylchloride® Tenta gel-resin (0.1 mmol, loading of 0.17 mmol/g) using the general procedure with following sequence: Fmoc-*L*-Pro-OH, Fmoc-*L*-Lys(Dde)-OH, Dde-off, DE-1-BB170 (2 equiv., Enamine, Catalog: EN300-31422), Fmoc-*L*-Ala-OH, Fmoc-*L*-Lys(N<sub>3</sub>)-OH, DE-3-BB54 (2 equiv., Enamine, Catalog: EN300-73177); CuI, 10%; TBTA, 10% in 6 mL of THF : DCM = 4 : 1 overnight at 25 °C), Fmoc-Gly-OH, Fmoc-*L*-Pro-OH, Fmoc-*L*-Lys(Dde)-OH, Dde-off, DE-2-BB65 (2 equiv., Aurora Building Blocks, Catalog: A00.670.978), Fmoc-*L*-Lys(Boc)-OH, Fmoc-*L*-Ala-OH. The peptide was released from the resin using cleavage solution of TFE/AcOH/DCM (2:1:7). Linear protected peptide was obtained as a white solid powder after precipitation, washing with diethyl ether, dissolved by CH<sub>3</sub>CN/H<sub>2</sub>O (1:1) and lyophilized. The linear decapeptide (5 mM) was dissolved in DMF and the pH was adjusted to 9 by addition of DIPEA. PyBOP (1.0 equiv.) was added and the solution stirred at 25 °C for 1 h. Solvent was removed under reduced pressure and the residue dissolved in CH<sub>3</sub>CN/H<sub>2</sub>O (1:1) and reverse-phase HPLC purification was performed. The desired cyclodecapeptide was recovered as a white powder after lyophilization. To the cyclodecapeptide was added 1 mL H<sub>2</sub>O and 20 mL TFA and the solution stirred at room temperature for 1 hour. Solvent was removed under reduced pressure and the residue dissolved in CH<sub>3</sub>CN/H<sub>2</sub>O (1:1). The desired cyclodecapeptide **TNF-2-amino** (0.5 M) was dissolved in DMF and DIPEA was added (5.0 equiv.). FITC (1.2 equiv.) was added and the solution stirred at 25 °C for 1 h. Solvent was removed under reduced pressure and the residue dissolved in CH<sub>3</sub>CN/H<sub>2</sub>O (1:1) and reverse-phase HPLC purification was performed.

The desired L19-TNF binder **TNF-2** was recovered as a yellow powder after lyophilization. **HRMS (m/z, C<sub>95</sub>H<sub>110</sub>BrN<sub>24</sub>O<sub>19</sub>S<sub>2</sub>, ESI):** calculated [M+H]<sup>+</sup>: 2033.7004; found: 2033.7035.

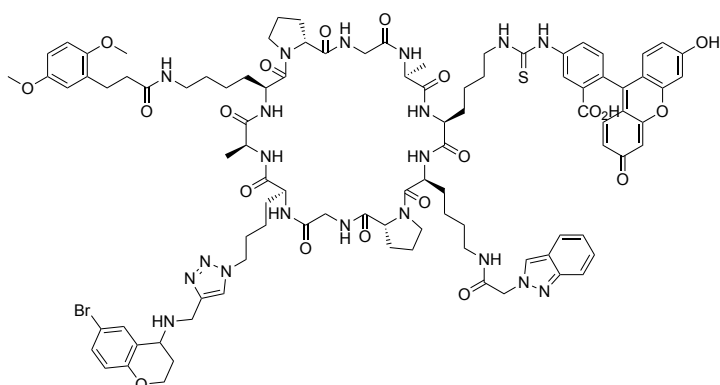

**Supplementary Figure 59 | Structure of the L19-TNF binder D-TNF-1.**

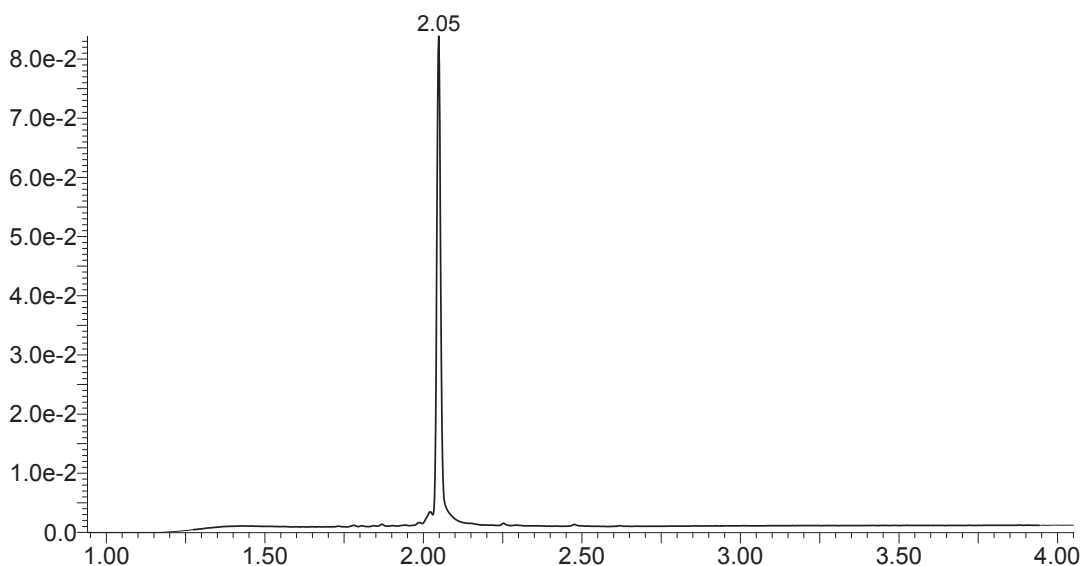

**Supplementary Figure 60 | UPLC chromatogram of D-TNF-1.** UPLC analyses were performed on a BEH C18 2.1 × 50 mm column at a flow rate of 0.6 mL/min with gradient: 5 % B (0 to 0.5 minutes), 5 % to 100 % B (0.5 to 4 minutes), 100 % B (4 to 6 minutes), (A= 0.1 % formic acid in water, B= CH<sub>3</sub>CN with 0.1 % formic acid), at 40 °C. Detection by absorbance at 260 nm.

**D-TNF-1 synthesis:** The linear decapeptide was assembled on Fmoc-Gly-2-chlorotrylchloride® Tenta gel-resin (0.1 mmol, loading of 0.17 mmol/g) using the general procedure with following sequence: Fmoc-*D*-Pro-OH, Fmoc-*L*-Lys(Dde)-OH, Dde-off, DE-1-BB20, Fmoc-*L*-Ala-OH, Fmoc-*L*-Lys(N<sub>3</sub>)-OH, DE-3-BB106; CuI, 10 %; TBTA, 10 % in 6 mL of THF : DCM = 4 : 1 overnight at 25 °C), Fmoc-Gly-OH, Fmoc-*D*-Pro-OH, Fmoc-*L*-Lys(Dde)-OH, Dde-off, DE-2-BB361, Fmoc-*L*-Lys(Boc)-OH, Fmoc-*L*-Ala-OH. The peptide was released from the resin using cleavage solution of TFE/AcOH/DCM (2:1:7). Linear protected peptide was obtained as a white solid powder after precipitation, washing with diethyl ether, dissolved by

CH<sub>3</sub>CN/H<sub>2</sub>O (1:1) and lyophilized. The linear decapeptide (5 mM) was dissolved in DMF and the pH was adjusted to 9 by addition of DIPEA. PyBOP (1.0 equiv.) was added and the solution stirred at 25 °C for 1 h. Solvent was removed under reduced pressure and the residue dissolved in CH<sub>3</sub>CN/H<sub>2</sub>O (1:1) and reverse-phase HPLC purification was performed. The desired cyclodecapeptide was recovered as a white powder after lyophilization. To the cyclodecapeptide was added 1 mL H<sub>2</sub>O and 20 mL TFA and the solution stirred at room temperature for 1 hour. Solvent was removed under reduced pressure and the residue dissolved in CH<sub>3</sub>CN/H<sub>2</sub>O (1:1). The desired cyclodecapeptide **D-TNF-1-amino** was recovered as a white powder after lyophilization. **D-TNF-1-amino** (0.5 M) was dissolved in DMF and DIPEA was added (5.0 equiv.). FITC (1.2 equiv.) was added and the solution stirred at 25 °C for 1 h. Solvent was removed under reduced pressure and the residue dissolved in CH<sub>3</sub>CN/H<sub>2</sub>O (1:1) and reverse-phase HPLC purification was performed. The desired L19-TNF binder **D-TNF-1** was recovered as a yellow powder after lyophilization. **HRMS (m/z, C<sub>97</sub>H<sub>118</sub>BrN<sub>20</sub>O<sub>20</sub>S, ESI):** calculated [M+H]<sup>+</sup>: 1993.7735; found: 1993.7607.

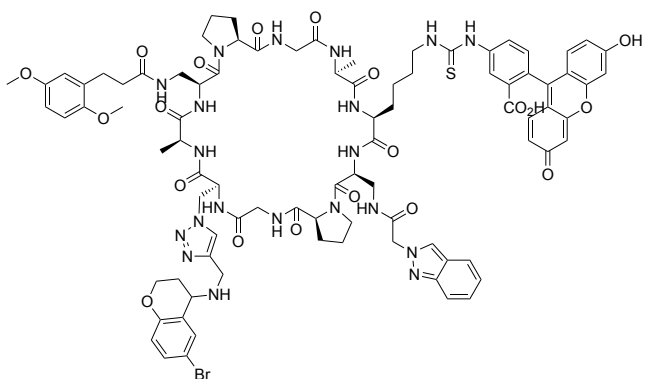

Supplementary Figure 61 | Structure of the L19-TNF binder DAP-TNF-1.

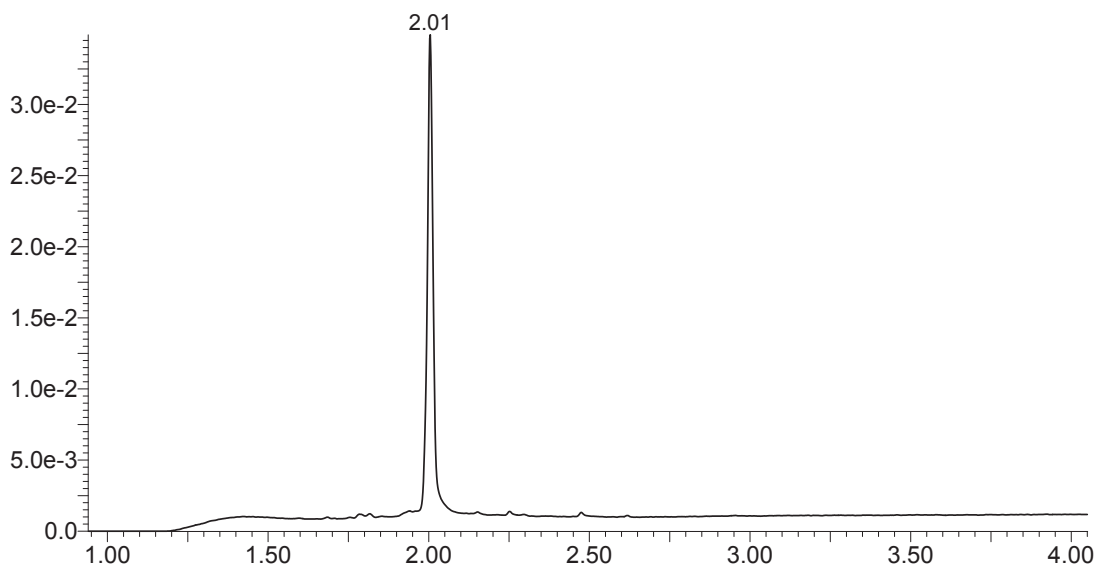

**Supplementary Figure 62 | UPLC chromatogram of DAP-TNF-1.** UPLC analyses were performed on a BEH C18 2.1 × 50 mm column at a flow rate of 0.6 mL/min with gradient: 5 % B (0 to 0.5 minutes), 5 % to 100 % B (0.5 to 4 minutes), 100 % B (4 to 6 minutes), (A= 0.1 % formic acid in water, B= CH<sub>3</sub>CN with 0.1 % formic acid), at 40 °C. Detection by absorbance at 260 nm.

**DAP-TNF-1 synthesis:** The linear decapeptide was assembled on Fmoc-Gly-2-chlorotriylchloride® Tenta gel-resin (0.1 mmol, loading of 0.17 mmol/g) using the general procedure with following sequence: Fmoc-*L*-Pro-OH, Fmoc-*L*-Dap(Dde)-OH, Dde-off, DE-1-BB20, Fmoc-*L*-Ala-OH, Fmoc-*L*-Dap(N<sub>3</sub>)-OH, DE-3-BB106; CuI, 10 %; TBTA, 10 % in 6 mL of THF : DCM = 4 : 1 overnight at 25 °C), Fmoc-Gly-OH, Fmoc-*L*-Pro-OH, Fmoc-*L*-Dap(Dde)-OH, Dde-off, DE-2-BB361, Fmoc-*L*-Lys(Boc)-OH, Fmoc-*L*-Ala-OH. The peptide was released from the resin using cleavage solution of TFE/AcOH/DCM (2:1:7). Linear protected peptide was obtained as a white solid powder after precipitation, washing with diethyl ether, dissolved by CH<sub>3</sub>CN/H<sub>2</sub>O (1:1) and lyophilized. The linear decapeptide (5 mM) was dissolved in DMF and the pH was adjusted to 9 by addition of DIPEA. PyBOP (1.0 equiv.) was added and the solution stirred at 25 °C for 1 h. Solvent was removed under reduced pressure and the residue dissolved in CH<sub>3</sub>CN/H<sub>2</sub>O (1:1) and reverse-phase HPLC purification was performed. The desired cyclodecapeptide was recovered as a white powder after lyophilization. To the cyclodecapeptide was added 1 mL H<sub>2</sub>O and 20 mL TFA and the solution stirred at room temperature for 1 hour. Solvent was removed under reduced pressure and the residue dissolved in CH<sub>3</sub>CN/H<sub>2</sub>O (1:1). The desired cyclodecapeptide **DAP-TNF-1-amino** was recovered as a white powder after lyophilization. **DAP-TNF-1-amino** (0.5 M) was dissolved in DMF and DIPEA was added (5.0 equiv.). FITC (1.2 equiv.) was added and the solution stirred at 25 °C for 1 h. Solvent was removed under reduced pressure and the residue dissolved in CH<sub>3</sub>CN/H<sub>2</sub>O (1:1) and reverse-phase HPLC purification was performed. The desired L19-TNF binder **DAP-TNF-1** was recovered as a yellow powder after lyophilization. **HRMS (m/z, C<sub>88</sub>H<sub>100</sub>BrN<sub>20</sub>O<sub>20</sub>S, ESI):** calculated [M+H]<sup>+</sup>: 1867.6327; found: 1867.6407.

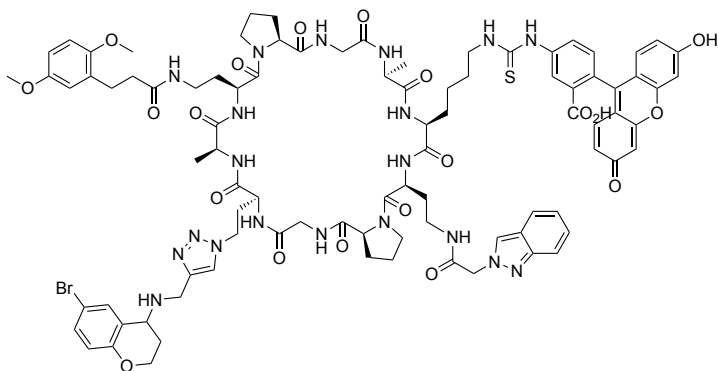

**Supplementary Figure 63 | Structure of the L19-TNF binder DAB-TNF-1.**

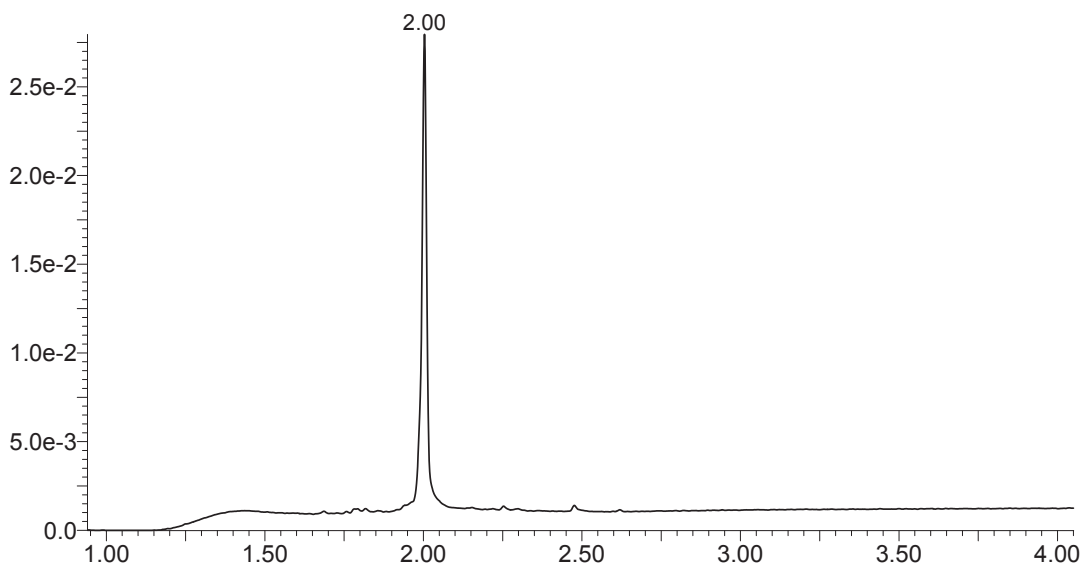

**Supplementary Figure 64 | UPLC chromatogram of DAB-TNF-1.** UPLC analyses were performed on a BEH C18 2.1 × 50 mm column at a flow rate of 0.6 mL/min with gradient: 5 % B (0 to 0.5 minutes), 5 % to 100 % B (0.5 to 4 minutes), 100 % B (4 to 6 minutes), (A= 0.1 % formic acid in water, B= CH<sub>3</sub>CN with 0.1 % formic acid), at 40 °C. Detection by absorbance at 260 nm.

**DAB-TNF-1 synthesis:** The linear decapeptide was assembled on Fmoc-Gly-2-chlorotriylchloride® Tenta gel-resin (0.1 mmol, loading of 0.17 mmol/g) using the general procedure with following sequence: Fmoc-*L*-Pro-OH, Fmoc-*L*-Dab(Dde)-OH (2 equiv., Iris, Catalog: FAA1365), Dde-off, DE-1-BB20, Fmoc-*L*-Ala-OH, Fmoc-*L*-Dab(N<sub>3</sub>)-OH(2 equiv., Iris, Catalog: FAA6620), DE-3-BB106; CuI, 10 %; TBTA, 10 % in 6 mL of THF : DCM = 4 : 1 overnight at 25 °C), Fmoc-Gly-OH, Fmoc-*L*-Pro-OH, Fmoc-*L*-Dab(Dde)-OH, Dde-off, DE-2-BB361, Fmoc-*L*-Lys(Boc)-OH, Fmoc-*L*-Ala-OH. The peptide was released from the resin using cleavage solution of TFE/AcOH/DCM (2:1:7). Linear protected peptide was obtained as a white solid powder after precipitation, washing with diethyl ether, dissolved by CH<sub>3</sub>CN/H<sub>2</sub>O (1:1) and lyophilized. The linear decapeptide (5 mM) was dissolved in DMF and the pH was adjusted to 9 by addition of DIPEA. PyBOP (1.0 equiv.) was added and the solution stirred at 25 °C for 1 h. Solvent was removed under reduced pressure and the residue dissolved in CH<sub>3</sub>CN/H<sub>2</sub>O (1:1) and reverse-phase HPLC purification was performed. The desired cyclodecapeptide was recovered as a white powder after lyophilization. To the cyclodecapeptide was added 1 mL H<sub>2</sub>O and 20 mL TFA and the solution stirred at room temperature for 1 hour. Solvent was removed under reduced pressure and the residue dissolved in CH<sub>3</sub>CN/H<sub>2</sub>O (1:1). The desired cyclodecapeptide **DAB-TNF-1-amino** was recovered as a white powder after lyophilization. **DAB-TNF-1-amino** (0.5 M) was dissolved in DMF and DIPEA was added (5.0 equiv.). FITC (1.2 equiv.) was added and the solution stirred at 25 °C for 1 h. Solvent was removed under reduced pressure and the residue dissolved in CH<sub>3</sub>CN/H<sub>2</sub>O (1:1) and reverse-phase HPLC

purification was performed. The desired L19-TNF binder **DAB-TNF-1** was recovered as a yellow powder after lyophilization.

**HRMS (m/z, C<sub>91</sub>H<sub>106</sub>BrN<sub>20</sub>O<sub>20</sub>S, ESI):** calculated [M+H]<sup>+</sup>: 1909.6763; found: 1909.6758.

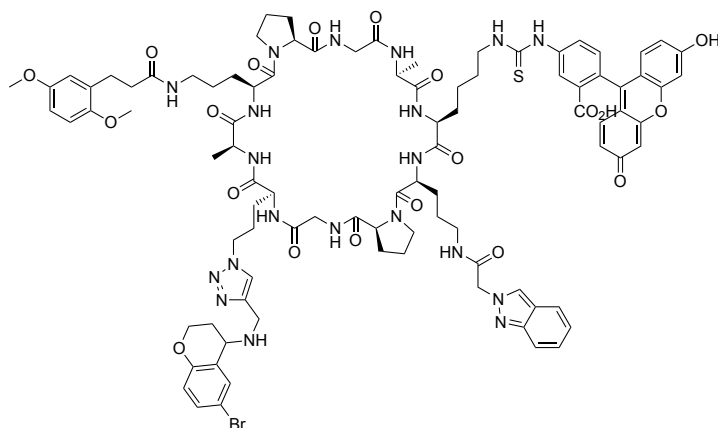

**Supplementary Figure 65 | Structure of the L19-TNF binder ORN-TNF-1.**

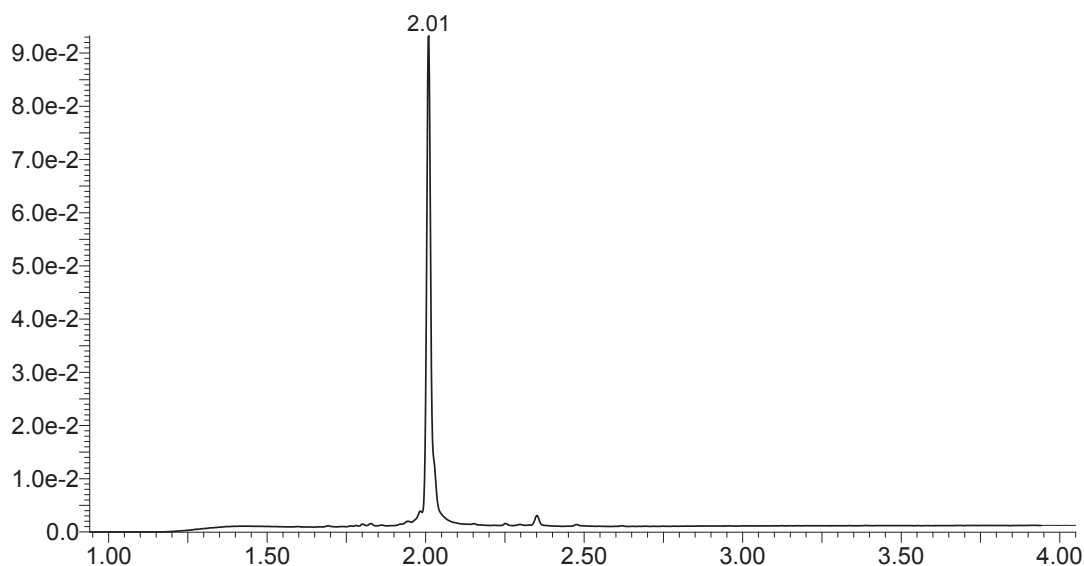

**Supplementary Figure 66 | UPLC chromatogram of ORN-TNF-1.** UPLC analyses were performed on a BEH C18 2.1 × 50 mm column at a flow rate of 0.6 mL/min with gradient: 5 % B (0 to 0.5 minutes), 5 % to 100 % B (0.5 to 4 minutes), 100 % B (4 to 6 minutes), (A= 0.1 % formic acid in water, B= CH<sub>3</sub>CN with 0.1 % formic acid), at 40 °C. Detection by absorbance at 260 nm.

**ORN-TNF-1 synthesis:** The linear decapeptide was assembled on Fmoc-Gly-2-chlorotriylchloride® Tenta gel-resin (0.1 mmol, loading of 0.17 mmol/g) using the general procedure with following sequence: Fmoc-*L*-Pro-OH, Fmoc-*L*-Orn(Dde)-OH (2 equiv., Iris, Catalog: FAA1365), Dde-off, DE-1-BB20, Fmoc-*L*-Ala-OH, Fmoc-*L*-Orn(N<sub>3</sub>)-OH(2 equiv., Iris, Catalog: FAA6620), DE-3-BB106; CuI, 10 %; TBTA, 10 % in 6 mL of THF : DCM = 4 : 1 overnight at 25 °C), Fmoc-Gly-OH, Fmoc-*L*-Pro-OH, Fmoc-*L*-Orn(Dde)-OH, Dde-off, DE-2-BB361, Fmoc-*L*-Lys(Boc)-OH, Fmoc-*L*-Ala-OH. The peptide was released

from the resin using cleavage solution of TFE/AcOH/DCM (2:1:7). Linear protected peptide was obtained as a white solid powder after precipitation, washing with diethyl ether, dissolved by CH<sub>3</sub>CN/H<sub>2</sub>O (1:1) and lyophilized. The linear decapeptide (5 mM) was dissolved in DMF and the pH was adjusted to 9 by addition of DIPEA. PyBOP (1.0 equiv.) was added and the solution stirred at 25 °C for 1 h. Solvent was removed under reduced pressure and the residue dissolved in CH<sub>3</sub>CN/H<sub>2</sub>O (1:1) and reverse-phase HPLC purification was performed. The desired cyclodecapeptide was recovered as a white powder after lyophilization. To the cyclodecapeptide was added 1 mL H<sub>2</sub>O and 20 mL TFA and the solution stirred at room temperature for 1 hour. Solvent was removed under reduced pressure and the residue dissolved in CH<sub>3</sub>CN/H<sub>2</sub>O (1:1). The desired cyclodecapeptide **ORN-TNF-1-amino** was recovered as a white powder after lyophilization. **ORN-TNF-1-amino** (0.5 M) was dissolved in DMF and DIPEA was added (5.0 equiv.). FITC (1.2 equiv.) was added and the solution stirred at 25 °C for 1 h. Solvent was removed under reduced pressure and the residue dissolved in CH<sub>3</sub>CN/H<sub>2</sub>O (1:1) and reverse-phase HPLC purification was performed. The desired L19-TNF binder **ORN-TNF-1** was recovered as a yellow powder after lyophilization. **HRMS (m/z, C<sub>94</sub>H<sub>112</sub>BrN<sub>20</sub>O<sub>20</sub>S, ESI):** calculated [M+H]<sup>+</sup>: 1951.7266; found: 1951.7267.

**Fluorescence polarization measurement with L19-TNF binder:** Freshly dissolved fluorescein labeled macrocycles (7.5 μL, final concentration 50 nM, final DMSO content adjusted to 2% in PBS) were incubated at 22 °C for 10 min in a black 384-well plate in PBS (pH 7.4) with increasing concentrations of L19-TNF to a final volume of 15 μL. The fluorescence anisotropy was measured on a Spectra Max Paradigm multimode plate reader. Experiments were performed in triplicate and the mean anisotropy values fitted to equation (3) using KaleidaGraph 4.1.3.

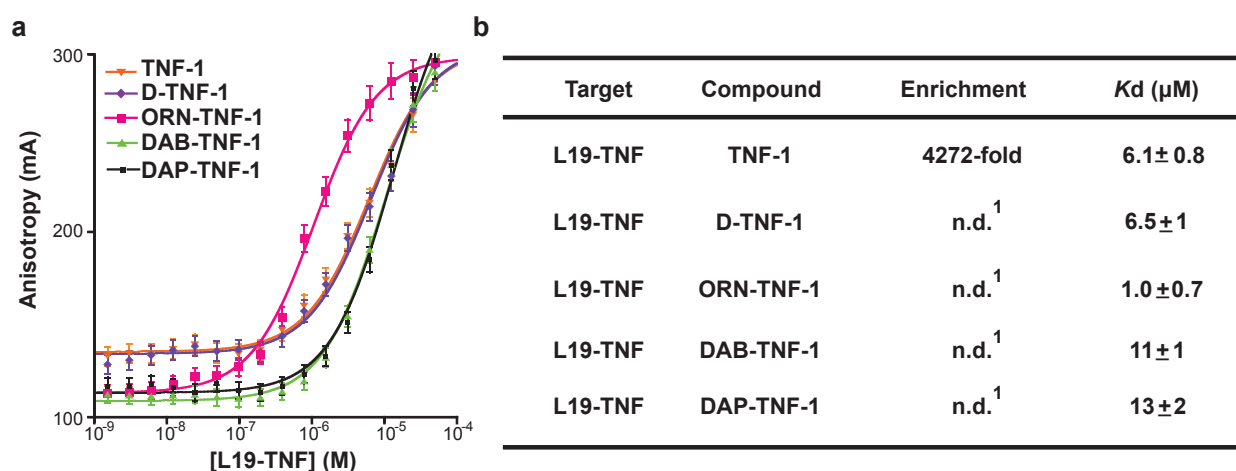

**Supplementary Figure 67 | Binder validation of selected cyclic peptides against L19-TNF.** a, fluorescence polarization measurements of selected fluorescently-labeled synthetic cyclic peptides against PSA. Error bars indicate the standard deviation of three measurements. b,



Enrichments and dissociation constants of synthesized cyclic peptides, chemical structures and corresponding identification numbers (**ID**) of the three diversity elements. For calculation of enrichment see Supplementary Table 7. **n.d.** = not determined.<sup>1</sup> = not included in the library.

**(f) Affinity determination of TNF binders by fluorescence polarization measurements.**

**Fluorescence polarization measurements with TNF binder:** Freshly dissolved fluorescein labeled macrocycles (7.5  $\mu$ L, final concentration 50 nM, final DMSO content adjusted to 2% in PBS) were incubated at 22 °C for 10 min in a black 384-well plate in PBS (pH 7.4) with increasing concentrations of TNF to a final volume of 15  $\mu$ L. The fluorescence anisotropy was measured on a Spectra Max Paradigm multimode plate reader. Experiments were performed in triplicate and the mean anisotropy values fitted to equation (3) using KaleidaGraph 4.1.3.

## 6. Immunofluorescence Performance of Selected PSA Binder.

**Immunofluorescence staining of PSA-1 and SC-2 on OCT-embedded snap frozen sections:** OCT-embedded frozen sections were defrosted and fixed in acetone (- 20 °C, 10 min). The sections were blocked with 20 % FCS (fetal calf serum, Invitrogen) in PBS (pH = 7.4) for 30 min. Sections were then washed (PBS, 5 min) before staining cell nuclei with DAPI (SigmaAldrich, Catalog: D9542). After two additional rounds of washing, **PSA-1** (100 µL, 0.5 µM in PBS with 5 % DMSO) or **SC-2** (100 µL, 0.5 µM in PBS with 5 % DMSO, as control) were then added to sections and incubated at room temperature for 2 h under dark. For detection, rabbit anti-FITC antibody (1:1000, Bio-Rad, Catalog: 4510-7804, 1h) was added to sections followed by goat anti-rabbit antibody Alexa 488 (1:500, Invitrogen, Catalog: A11008, 1h). After additional washing steps (PBS, 5 min), sections were dried at room temperature under dark and mounted with DAKO fluorescent mounting medium (SigmaAldrich, Catalog: M1289). Slides were analyzed with Axioskop2 mot plus microscope (Zeiss).

**Immunofluorescence staining of anti-PSA antibody to OCT-embedded snap frozen sections:** OCT-embedded frozen sections were defrosted and fixed in acetone (- 20 °C, 10 min). The sections were blocked with 20 % FCS (fetal calf serum, Invitrogen) in PBS (pH = 7.4) for 30 min. Sections were then washed (PBS, 5 min) before staining cell nuclei with DAPI. After two additional rounds of washing, Mouse anti-PSA antibody (1: 25, DAKO, Catalog: M0750, PBS with 2 % BSA) was then added to sections and incubated at room temperature for 2 h under dark. For detection, goat anti-mouse antibody Alexa 488 (1:5000, Invitrogen, Catalog: A11029, 1h) was added to sections. After additional washing steps (PBS, 5 min), sections were dried at room temperature under dark and mounted with DAKO fluorescent mounting medium. Slides were analyzed with Axioskop2 mot plus microscope.

## 7. *In vivo* Performance of CAIX Binder.

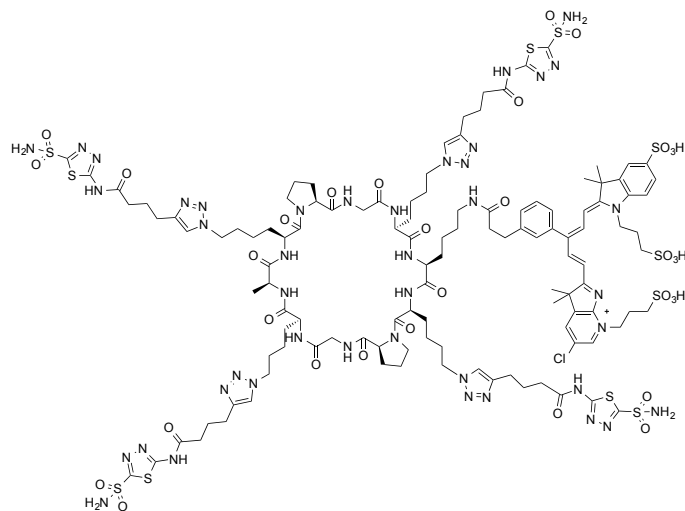

Supplementary Figure 68 | Structure of the CAIX binder IRDye conjugate CAIX-IRDye.

CAIX\_IRDye

(2) PDA Ch2 260nm@4.8nm  
Range: 4e-1

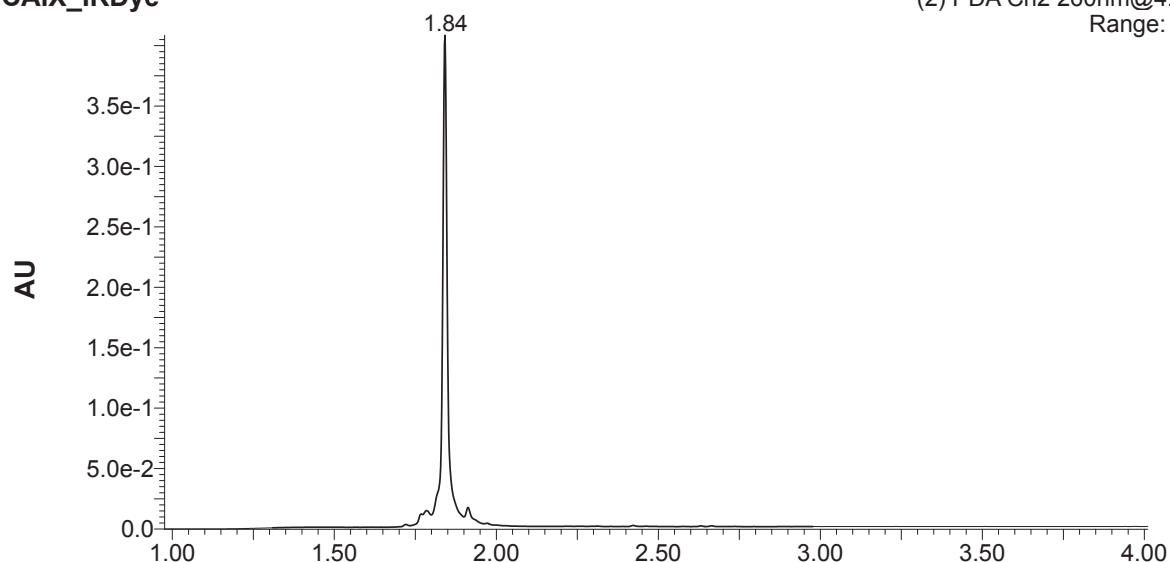

Supplementary Figure 69 | UPLC chromatogram of CAIX-IRDye. UPLC analyses were performed on a BEH C18 2.1 × 50 mm column at a flow rate of 0.6 mL/min with gradient: 5 % B (0 to 0.5 minutes), 5 % to 100 % B (0.5 to 4 minutes), 100 % B (4 to 6 minutes), (A= 0.1 % formic acid in water, B= CH<sub>3</sub>CN with 0.1 % formic acid), at 40 °C. Detection by absorbance at 260 nm.

**CAIX-IRDye conjugate synthesis:** The linear decapeptide was assembled on Fmoc-Gly-2-chlorotriylchloride® Tenta gel-resin (0.1 mmol, loading of 0.17 mmol/g) using the general procedure with following sequence: Fmoc-*L*-Pro-OH, Fmoc-*L*-Lys(N<sub>3</sub>)-OH, Fmoc-*L*-Ala-OH, Fmoc-*L*-Lys(N<sub>3</sub>)-OH, Fmoc-Gly-OH, Fmoc-*L*-Pro-OH, Fmoc-*L*-Lys(N<sub>3</sub>)-OH, Fmoc-*L*-Lys(Boc)-OH, Fmoc-*L*-Lys(N<sub>3</sub>)-OH, DE-3-BB17 (8 equiv., *N*-(5-sulfamoyl-1,3,4-thiadiazol-2-yl)hex-5-ynamide; CuI, 10 %; TBTA, 10 % in 6 mL of THF : DCM = 4 : 1 overnight at 25 °C). The peptide was released from the resin using cleavage

solution of TFE/AcOH/DCM (2:1:7). Linear protected peptide was obtained as a white solid powder after precipitation, washing with diethyl ether, dissolved by CH<sub>3</sub>CN/H<sub>2</sub>O (1:1) and lyophilized. The linear decapeptide (5 mM) was dissolved in DMF and the pH was adjusted to 9 by addition of DIPEA. PyBOP (1.0 equiv.) was added and the solution stirred at 25 °C for 1 h. Solvent was removed under reduced pressure and the residue dissolved in CH<sub>3</sub>CN/H<sub>2</sub>O (1:1) and reverse-phase HPLC purification was performed. The desired cyclodecapeptide was recovered as a white powder after lyophilization. To the cyclodecapeptide was added 1 mL H<sub>2</sub>O and 20 mL TFA and the solution stirred at room temperature for 1 hour. Solvent was removed under reduced pressure and the residue dissolved in CH<sub>3</sub>CN/H<sub>2</sub>O (1:1). The desired cyclodecapeptide **CAIX-IRDye-amino** was recovered as a white powder after lyophilization. **CAIX-IRDye-amino** (0.5 M) was dissolved in DMF and DIPEA was added (5.0 equiv.). IRDye@680 RD NHS (0.9 equiv., LI-COR, Catalog: P/N 929-70050) was added and the solution stirred at 25 °C for 1 h. Solvent was removed under reduced pressure and the residue dissolved in CH<sub>3</sub>CN/H<sub>2</sub>O (1:1) and reverse-phase HPLC purification was performed. The desired CAIX binder **CAIX-IRDye** was recovered as a purple powder after lyophilization. **HRMS (*m/z*, C<sub>118</sub>H<sub>160</sub>ClN<sub>42</sub>O<sub>32</sub>S<sub>11</sub><sup>+</sup>, ESI):** calculated [M+H]<sup>2+</sup>: 1531.9398 found: 1532.4447.

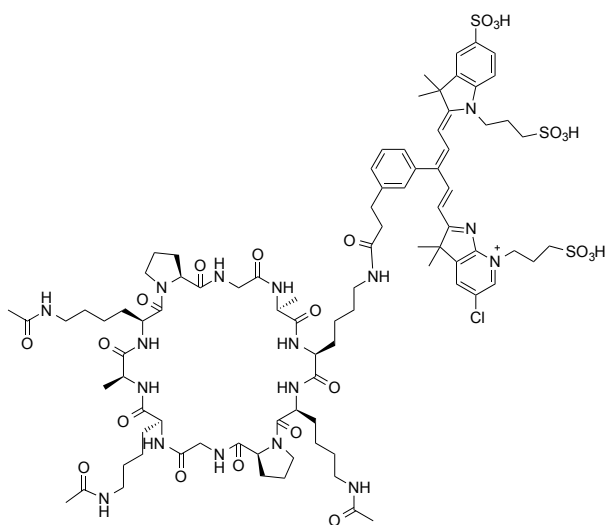

**Supplementary Figure 70 | Structure of the scaffold control IRDye conjugate SC-IRDye.**

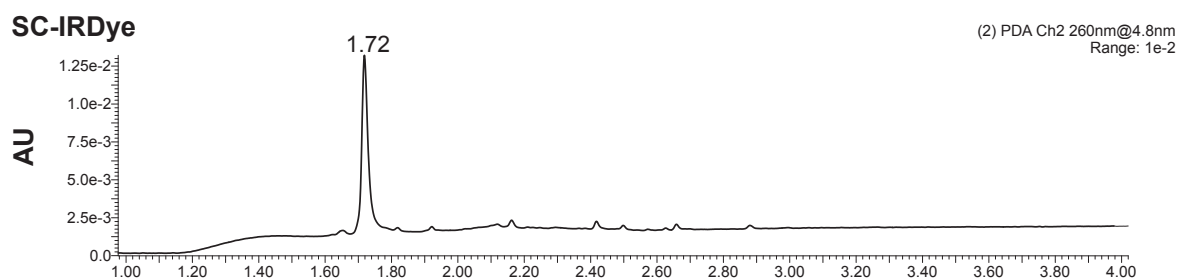

**Supplementary Figure 71 | UPLC chromatogram of SC-IRDye.** UPLC analyses were performed on a BEH C18 2.1 × 50 mm column at a flow rate of 0.6 mL/min with gradient: 5 % B (0 to 0.5 minutes), 5 % to 100 % B (0.5 to 4 minutes), 100 % B (4 to 6 minutes), (A= 0.1 % formic acid in water, B= CH<sub>3</sub>CN with 0.1 % formic acid), at 40 °C. Detection by absorbance at 260 nm.

**Scaffold control IRDye conjugate SC-IRDye synthesis:** SC-1-amino (0.5 M) was dissolved in DMF and DIPEA was added (5.0 equiv.). IRDye@680 RD NHS (0.9 equiv., LI-COR, Catalog: P/N 929-70050) was added and the solution stirred at 25 °C for 1 h. Solvent was removed under reduced pressure and the residue dissolved in CH<sub>3</sub>CN/H<sub>2</sub>O (1:1) and reverse-phase HPLC purification was performed. The desired SC-IRDye was recovered as a purple powder after lyophilization. **HRMS (m/z, C<sub>89</sub>H<sub>127</sub>CIN<sub>17</sub>O<sub>23</sub>S<sub>3</sub><sup>+</sup>, ESI):** calculated [M]<sup>+</sup>: 1932.8136, found: 1932.8158.

**Cell Cultures:** The human renal cell carcinoma cell line SKRC-52 was kindly provided by Professor E. Oosterwijk (Radboud University Nijmegen Medical Centre, Nijmegen, The Netherlands) and tested for CAIX expression by immunofluorescence. Cells were cultured in adhesion in RPMI medium (Invitrogen) supplemented with fetal calf serum (10%, FCS, Invitrogen) and Antibiotic-Antimycotic (1%, AA, Invitrogen) at 37 °C and 5% CO<sub>2</sub>. For passaging, cells were detached using Trypsin-EDTA 0.05% (Invitrogen) when reaching 90% confluence and re-seeded at a dilution of 1:6.

**Animal Studies:** All animal experiments were conducted in accordance with Swiss animal welfare laws and regulations under the license number 27/2015 granted by the Veterinäramt des Kantons Zürich.

**Implantation of Subcutaneous SKRC-52 Tumors:** SKRC-52 cells were grown to 80% confluence and detached with Trypsin-EDTA 0.05% (Life Technologies). Cells were washed with Hank's Balanced Salt Solution (HBSS, pH 7.4) once, counted and re-suspended in HBSS to a final concentration of  $3.4 \times 10^7$  cells/ml. Aliquots of  $5 \times 10^6$  cells (120 µl of a suspension) were injected subcutaneously in the right flank of female athymic BALB/c nu/nu mice (6-8 weeks of age, Janvier).

**IVIS Imaging:** Female BALB/c nude mice bearing subcutaneous SKRC-52 tumors were injected intravenously with compound CAIX-IRDye or SC-IRDye (3 nmol), dissolved in sterile PBS, containing 10% of DMSO to increase the solubility. Mice were anesthetized with isoflurane and fluorescence images acquired on an IVIS Spectrum imaging system (Xenogen, exposure 1s, binning factor 8, excitation at 675 nm, emission filter at 720 nm, f number 2, field of view 13.1). Images were taken after 5 min, 1 h, 3 h and 7 h after compounds administration. Food and water was given ad libitum during that period. At 24 h time point, animals were sacrificed by cervical dislocation and pictures of organs were taken under the IVIS camera (Xenogen, exposure 1s, binning factor 8, excitation at 675 nm, emission filter at 720 nm, f number 2, field of view 13.1).

## 8. Performance of Chemical Probes Developed from Selected CaM binder.

### (a) Synthesis of CaM specific probe and scaffold control probe.

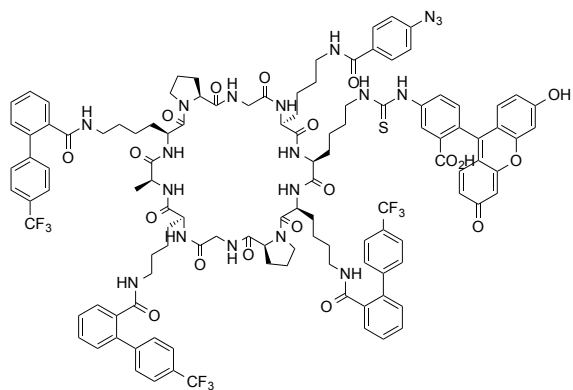

Supplementary Figure 72 | Structure of the CaM specific probe CaM-PC.

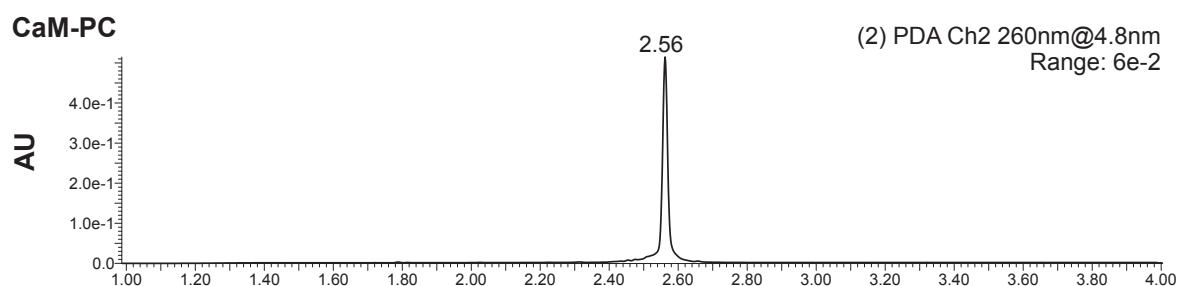

Supplementary Figure 73 | UPLC chromatogram of CaM-PC. UPLC analyses were performed on a BEH C18 2.1 × 50 mm column at a flow rate of 0.6 mL/min with gradient: 5 % B (0 to 0.5 minutes), 5 % to 100 % B (0.5 to 4 minutes), 100 % B (4 to 6 minutes), (A= 0.1 % formic acid in water, B= CH<sub>3</sub>CN with 0.1 % formic acid), at 40 °C. Detection by absorbance at 260 nm.

**CaM specific probe CaM-PC synthesis:** The linear decapeptide was assembled on Fmoc-Gly-2-chlorotriylchloride® Tenta gel-resin (0.1 mmol, loading of 0.17 mmol/g) using the general procedure with following sequence: Fmoc-*L*-Pro-OH, Fmoc-*L*-Lys(Dde)-OH, Dde-off, DE-1-BB241 (2 equiv., SigmaAldrich, Catalog: 346357), Fmoc-*L*-Ala-OH, , Fmoc-*L*-Lys(Dde)-OH, Dde-off, DE-1-BB241 (2 equiv., SigmaAldrich, Catalog: 346357), Fmoc-Gly-OH, Fmoc-*L*-Pro-OH, Fmoc-*L*-Lys(Dde)-OH, Dde-off, DE-2-BB314 (2 equiv., SigmaAldrich, Catalog: 346357), Fmoc-*L*-Lys(Boc)-OH, Fmoc-*L*- Fmoc-*L*-Lys(Dde)-OH, Dde-off, 4-azidobenzoic acid (2 equiv., TCI, Catalog: A0930),. The peptide was released from the resin using cleavage solution of TFE/AcOH/DCM (2:1:7). Linear protected peptide was obtained as a white solid powder after

precipitation, washing with diethyl ether, dissolved by CH<sub>3</sub>CN/H<sub>2</sub>O (1:1) and lyophilized. The linear decapeptide (5 mM) was dissolved in DMF and the pH was adjusted to 9 by addition of DIPEA. PyBOP (1.0 equiv.) was added and the solution stirred at 25 °C for 1 h. Solvent was removed under reduced pressure and the residue dissolved in CH<sub>3</sub>CN/H<sub>2</sub>O (1:1) and reverse-phase HPLC purification was performed. The desired cyclodecapeptide was recovered as a white powder after lyophilization. To the cyclodecapeptide was added 1 mL H<sub>2</sub>O and 20 mL TFA and the solution stirred at room temperature for 1 hour. Solvent was removed under reduced pressure and the residue dissolved in CH<sub>3</sub>CN/H<sub>2</sub>O (1:1). The desired cyclodecapeptide **CaM-PC-amino** was recovered as a white powder after lyophilization. **CaM-PC-amino** (0.5 M) was dissolved in DMF and DIPEA was added (5.0 equiv.). FITC (1.2 equiv., TCI) was added and the solution stirred at 25 °C for 1 h. Solvent was removed under reduced pressure and the residue dissolved in CH<sub>3</sub>CN/H<sub>2</sub>O (1:1) and reverse-phase HPLC purification was performed. The desired CaM binder **CaM-PC** was recovered as a white powder after lyophilization. **HRMS (*m/z*, C<sub>117</sub>H<sub>121</sub>F<sub>9</sub>N<sub>19</sub>O<sub>19</sub>S, ESI):** calculated [M+H]<sup>+</sup>: 2298.8663; found: 2298.8625.

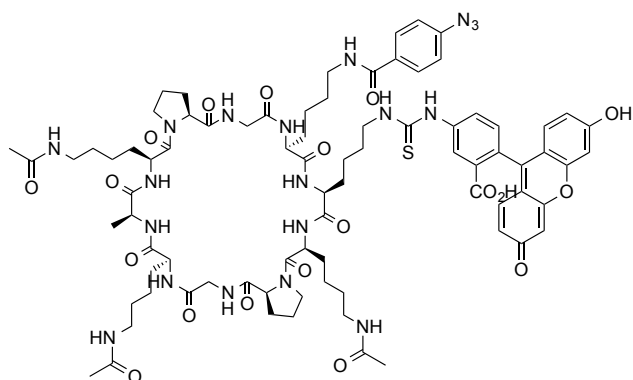

**Supplementary Figure 74 | Structure of the scaffold control probe SC-PC.**

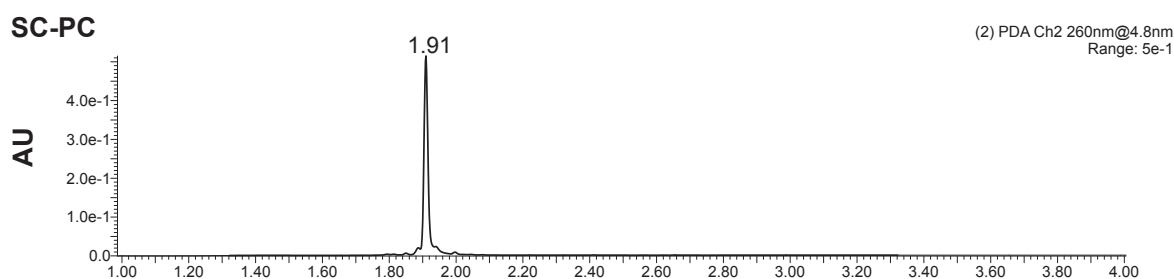

**Supplementary Figure 75 | UPLC chromatogram of SC-PC.** UPLC analyses were performed on a BEH C18 2.1 × 50 mm column at a flow rate of 0.6 mL/min with gradient: 5 % B (0 to 0.5 minutes), 5 % to 100 % B (0.5 to 4 minutes), 100 % B (4 to 6 minutes), (A= 0.1 % formic acid in water, B= CH<sub>3</sub>CN with 0.1 % formic acid), at 40 °C. Detection by absorbance at 260 nm.

**Scaffold control probe SC-PC synthesis:** The linear decapeptide was assembled on Fmoc-Gly-2-chlorotritylchloride® Tenta gel-resin (0.1 mmol, loading of 0.17 mmol/g) using the general procedure with following sequence: Fmoc-*L*-Pro-OH, Fmoc-*L*-Lys(Ac)-OH (2 equiv., Senn, Catalog: 101317), Fmoc-*L*-Ala-OH, Fmoc-*L*-Lys(Ac)-OH, Fmoc-Gly-OH, Fmoc-*L*-Pro-OH, Fmoc-*L*-Lys(Ac)-OH, Fmoc-*L*-Lys(Boc)-OH, Fmoc-*L*- Fmoc-*L*-Lys(Dde)-OH, Dde-off, 4-azidobenzoic acid (2 equiv., TCI, Catalog: A0930),. The peptide was released from the resin using cleavage solution of TFE/AcOH/DCM (2:1:7). Linear protected peptide was obtained as a white solid powder after precipitation, washing with diethyl ether, dissolved by CH<sub>3</sub>CN/H<sub>2</sub>O (1:1) and lyophilized. The linear decapeptide (5 mM) was dissolved in DMF and the pH was adjusted to 9 by addition of DIPEA. PyBOP (1.0 equiv.) was added and the solution stirred at 25 °C for 1 h. Solvent was removed under reduced pressure and the residue dissolved in CH<sub>3</sub>CN/H<sub>2</sub>O (1:1) and reverse-phase HPLC purification was performed. The desired cyclodecapeptide was recovered as a white powder after lyophilization. To the cyclodecapeptide was added 1 mL H<sub>2</sub>O and 20 mL TFA and the solution stirred at room temperature for 1 hour. Solvent was removed under reduced pressure and the residue dissolved in CH<sub>3</sub>CN/H<sub>2</sub>O (1:1). The desired cyclodecapeptide **SC-PC-amino** was recovered as a white powder after lyophilization. **SC-PC-amino** (0.5 M) was dissolved in DMF and DIPEA was added (5.0 equiv.). FITC (1.2 equiv., TCI) was added and the solution stirred at 25 °C for 1 h. Solvent was removed under reduced pressure and the residue dissolved in CH<sub>3</sub>CN/H<sub>2</sub>O (1:1) and reverse-phase HPLC purification was performed. The desired CaM binder **SC-PC** was recovered as a white powder after lyophilization. **HRMS (*m/z*, C<sub>81</sub>H<sub>106</sub>N<sub>19</sub>O<sub>19</sub>S, ESI):** calculated [M+H]<sup>+</sup>: 1680.7633; found: 1680.7703.

**(b) CaM labelling experiments.**

In a 96-well plate, HSA (15 μM) spiked with CaM (3 μM) in DPBS (with 10 % DMSO) was incubated with the probe (**CaM-PC** or **SC-PC**) at 10 μM for 10 min at 0 °C (on ice) with gentle shaking at 300 μL final volume<sup>11</sup>. The samples were irradiated under 365 nm at 0 °C (on ice) for 15 min. Protein samples were purified by Vivaspin 500 centrifugal concentrators (Sigma, Catalog: Z614025) and mixed with 5 × SDS loading buffer, boiled at 95 °C for 5 min, and separated by SDS-PAGE (12%). The gel was washed with methanol in water (50 %) for 30 min and visualized for in-gel fluorescence with a Bio-Rad Chemidoc image system. The gel was stained with Coomassie Brilliant Blue for 10 min and destained before visualizing with a Bio-Rad Chemidoc image system.



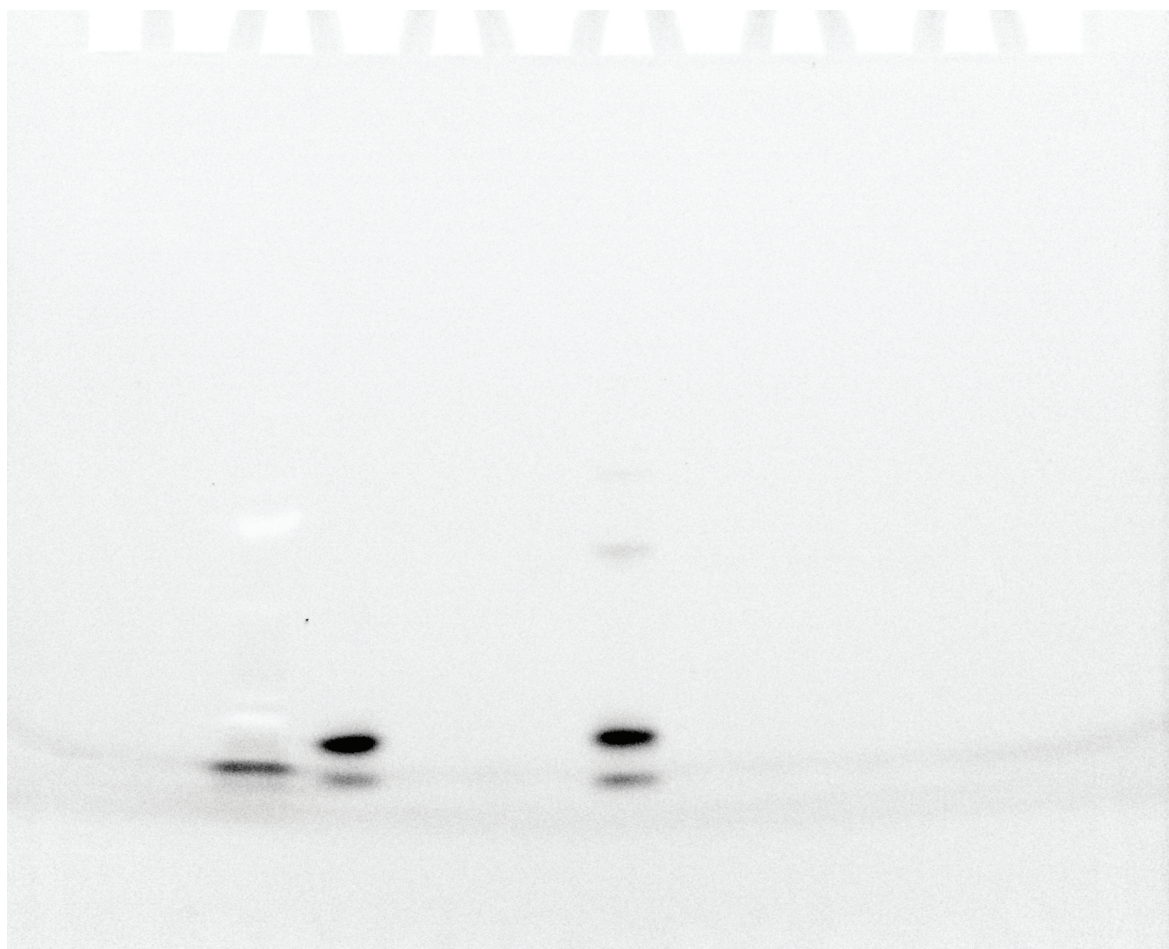

| marker    | 1 | 2 | 3 | 4 | 5 | 6 | 7 |
|-----------|---|---|---|---|---|---|---|
| CaM       | + | + | - | + | + | + | + |
| HSA       | - | - | + | + | + | + | + |
| CaM-PC    | + | + | + | + | + | - | + |
| SC-PC     | - | - | - | - | - | + | - |
| <i>hν</i> | + | - | + | + | - | + | + |

**Supplementary Figure 76 | Full gel imaging with FITC detection.** left lane, marker; lane 1, CaM (3  $\mu$ M)/CaM-PC (10  $\mu$ M), *hν*; lane 2, same as lane 1, no *hν*; lane 3, HSA (15  $\mu$ M)/CaM-PC (10  $\mu$ M), *hν*; lane 4, CaM (3  $\mu$ M)/HSA (15  $\mu$ M)/CaM-PC (10  $\mu$ M), *hν*; lane 5: same as lane 4, no *hν*; lane 6, same as lane 4 with scaffold control SC-PC instead of CaM-PC; lane 7, same as lane 4, with addition of soluble competitor CaM-3-amino (100  $\mu$ M).

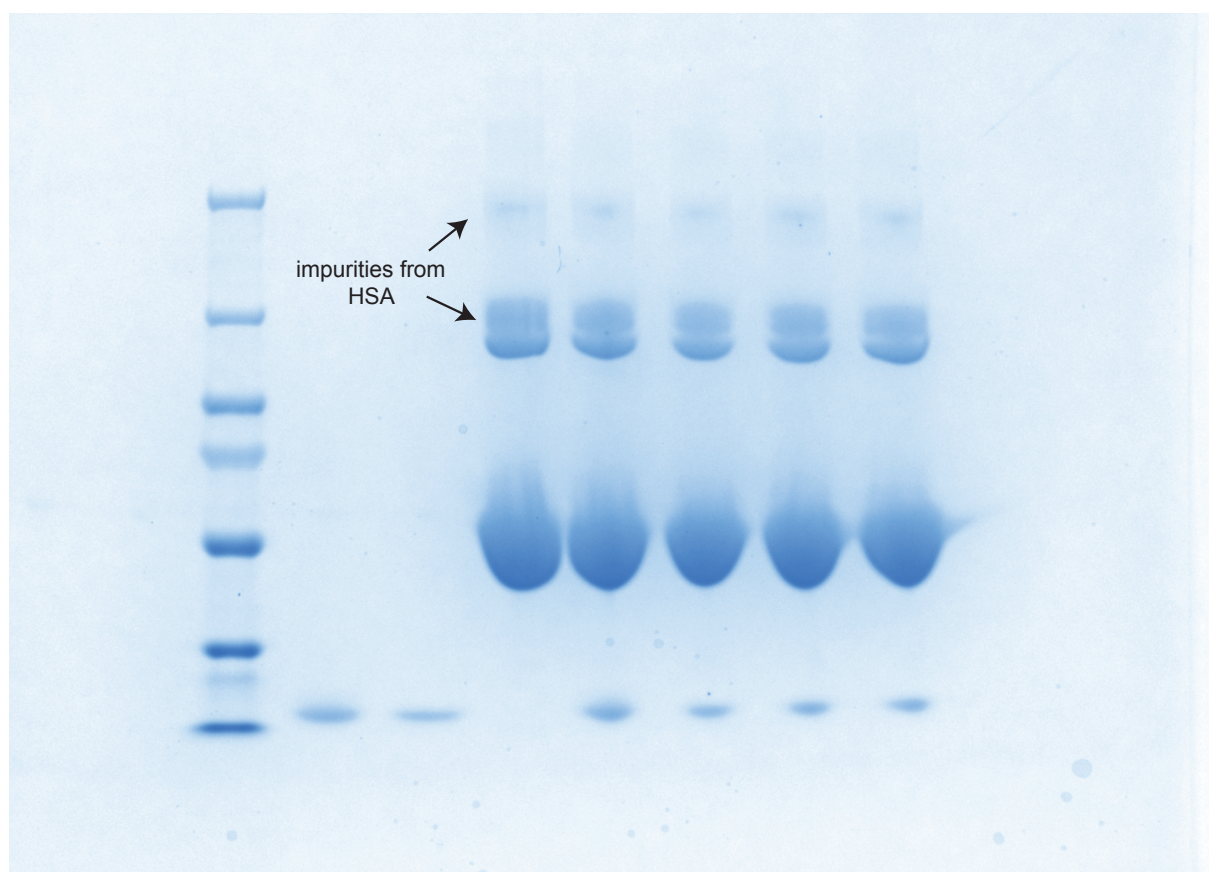

| marker    | 1 | 2 | 3 | 4 | 5 | 6 | 7 |
|-----------|---|---|---|---|---|---|---|
| CaM       | + | + | - | + | + | + | + |
| HSA       | - | - | + | + | + | + | + |
| CaM-PC    | + | + | + | + | + | - | + |
| SC-PC     | - | - | - | - | - | + | - |
| <i>hν</i> | + | - | + | + | - | + | + |

**Supplementary Figure 77 | Full gel imaging with Coomassie Brilliant Blue detection.** left lane, marker; lane 1, CaM (3  $\mu\text{M}$ )/CaM-PC (10  $\mu\text{M}$ ), *hν*; lane 2, same as lane 1, no *hν*; lane 3, HSA (15  $\mu\text{M}$ )/CaM-PC (10  $\mu\text{M}$ ), *hν*; lane 4, CaM (3  $\mu\text{M}$ )/HSA (15  $\mu\text{M}$ )/CaM-PC (10  $\mu\text{M}$ ), *hν*; lane 5: same as lane 4, no *hν*; lane 6, same as lane 4 with scaffold control SC-PC instead of CaM-PC; lane 7, same as lane 4, with addition of soluble competitor CaM-3-amino (100  $\mu\text{M}$ ).

**(c) Mass spectrometry analysis of covalent adduct of CaM-probe to CaM.**

In a 96-well plate, CaM (10  $\mu\text{M}$ ) in DPBS (with 10 % DMSO) was incubated with the probe (CaM-PC) at 10  $\mu\text{M}$  for 10 min at 0  $^{\circ}\text{C}$  (on ice) with gentle shaking at 300  $\mu\text{L}$  final volume. The samples were irradiated under 365 nm at 0  $^{\circ}\text{C}$  (on ice) for 15 min. Protein samples were purified by Vivaspin 500 centrifugal concentrators and dissolved by 100  $\mu\text{L}$  PBS. 10  $\mu\text{L}$  of the dissolved samples were injected into a Xevo G2-XS Q-TOF with electrospray ionization source. In detail, data were acquired for 0.5 sec scan time in continuum mode over  $m/z$  range from 500 to 4000 Da (desolvation gas temperature = 500  $^{\circ}\text{C}$ ,

desolvation gas flow rate = 1000 L/h, capillary voltage = 3 kV, sampling cone voltage = 25 V). MaxEnt 1 software was used to deconvolute the multiple charge states.

## 9. References.

1. Galibert, M., Renaudet, O., Dumy, P. & Boturyn, D. Access to Biomolecular Assemblies through One-Pot Triple Orthogonal Chemoselective Ligations. *Angew. Chem. Int. Ed.* **50**, 1901-1904 (2011).
2. Li, Y. *et al.* Optimized Reaction Conditions for Amide Bond Formation in DNA-Encoded Combinatorial Libraries. *ACS Comb. Sci.* **18**, 438-443 (2016).
3. Li, Y., Zhao, P., Zhang, M., Zhao, X. & Li, X. Multistep DNA-templated synthesis using a universal template. *J. Am. Chem. Soc.* **135**, 17727-17730 (2013).
4. Franzini, R. M. *et al.* Systematic evaluation and optimization of modification reactions of oligonucleotides with amines and carboxylic acids for the synthesis of DNA-encoded chemical libraries. *Bioconjug. Chem.* **25**, 1453-1461 (2014).
5. Clark, M. A. *et al.* Design, synthesis and selection of DNA-encoded small-molecule libraries. *Nat. Chem. Biol.* **5**, 647-654 (2009).
6. Franzini, R. M. *et al.* Identification of structure-activity relationships from screening a structurally compact DNA-encoded chemical library. *Angew. Chem. Int. Ed.* **54**, 3927-3931 (2015).
7. Halin, C. *et al.* Synergistic Therapeutic Effects of a Tumor Targeting Antibody Fragment, Fused to Interleukin 12 and to Tumor Necrosis Factor  $\alpha$ . *Cancer Res.* **63**, 3202-3210 (2003).
8. Li, Y., Zimmermann, G., Scheuermann, J. & Neri, D. Quantitative PCR is a Valuable Tool to Monitor the Performance of DNA-Encoded Chemical Library Selections. *ChemBioChem* **18**, 848-852 (2017).
9. Decurtins, W. *et al.* Automated screening for small organic ligands using DNA-encoded chemical libraries. *Nat. Protoc.* **11**, 764-780 (2016).
10. Krall, N. *et al.* A Small-Molecule Drug Conjugate for the Treatment of Carbonic Anhydrase IX Expressing Tumors. *Angew. Chem. Int. Ed.* **53**, 4231-4235 (2014).
11. Zhao, P. *et al.* Selection of DNA-encoded small molecule libraries against unmodified and non-immobilized protein targets. *Angew. Chem. Int. Ed.* **53**, 10056-10059 (2014).
